# Supplementary material for: Gibberellin delays metabolic shift during tomato ripening by inducing auxin signaling
Source: Front Plant Sci. 2022 Nov 14;13:1045761. doi: 10.3389/fpls.2022.1045761 (PMC9703062; doi:10.3389/fpls.2022.1045761)
Supplement: Supplementary file 3 [file Table_3.xlsx]

## Sheet: DEG_CON_GA_FC_cutoff
Table S3. DEGs in response to gibberellin treatment on day 1
genes	Gene INTERPROSCAN	NCBI_gene_ID	Gene define	logFC	logCPM	LR	PValue	FDR	CT-1d-Control-3	CT-1d-Control-2	CT-1d-GA-3	CT-1d-Control-1	CT-1d-GA-2	CT-1d-GA-1
Solyc03g005580.2.1	IPR006045		cruciferin 3	-8.76742	4.82515	894.159	1.82662e-196	4.61074e-192	5.97418	5.9838	-2.46527	5.44589	-2.44613	-4.4652
Solyc09g090150.3.1	IPR006045		RmlC-like cupins superfamily protein	-8.98105	6.55814	672.621	2.68913e-148	3.39394e-144	7.97086	7.28163	-0.437305	7.30075	-1.63195	-3.09929
Solyc11g072310.2.1	IPR005123	544200	2-oxoglutarate (2OG) and Fe(II)-dependent oxygenase superfamily protein	-5.62509	3.60151	652.993	4.99227e-144	4.2005e-140	4.70567	4.33508	-0.615387	4.63638	-1.22765	-1.31351
Solyc03g097440.3.1	IPR020904	101262295	hydroxysteroid dehydrogenase 1	-2.77652	6.12592	647.031	9.88143e-143	6.23568e-139	6.89056	7.02089	4.20536	6.87057	4.15547	4.09703
Solyc06g036290.3.1	IPR003594		heat shock protein 90.1	2.8231	7.56997	608.218	2.73055e-134	1.37849e-130	5.43633	5.69015	8.36279	5.52953	8.29956	8.46778
Solyc09g025210.3.1	IPR011051	101258989	RmlC-like cupins superfamily protein	-9.19479	6.56086	546.452	7.44546e-121	3.1323e-117	7.94211	7.65032	-0.713414	6.89179	-2.44613	-2.15967
Solyc02g088630.3.1	IPR029044		galacturonosyltransferase 13	2.71523	5.29807	529.389	3.83664e-117	1.38349e-113	3.32017	3.2612	6.09868	3.52364	6.01289	6.15471
Solyc09g072560.3.1	IPR022379	101252924	RmlC-like cupins superfamily protein	-9.08581	7.08766	468.935	5.46466e-104	1.72424e-100	8.56631	8.09739	-0.278809	7.33764	-1.35025	-1.59541
Solyc12g008430.2.1	IPR001891		NADP-malic enzyme 4	-2.88003	5.1825	396.945	2.54658e-88	7.14232e-85	6.11412	5.77075	2.97388	6.08244	3.03902	3.31267
Solyc01g104950.3.1	IPR001764	543515	beta-D-xylosidase 4	-2.14441	5.36628	394.759	7.6187e-88	1.92311e-84	6.12715	6.02663	4.03091	6.05604	3.9105	3.83716
Solyc10g009430.3.1	IPR009721	101263851	O-acyltransferase (WSD1-like) family protein	-2.40683	4.44199	383.255	2.43341e-85	5.58401e-82	5.05844	5.28542	2.84205	5.21836	2.71904	2.79425
Solyc08g061130.3.1	IPR004827	543733	Basic-leucine zipper (bZIP) transcription factor family protein	2.09682	5.43346	380.43	1.00289e-84	2.10957e-81	4.05886	4.01408	6.2281	4.01777	6.08564	6.06291
Solyc01g010490.3.1	IPR001128	101254820	cytochrome P450, family 83, subfamily B, polypeptide 1	-2.16596	5.20863	377.362	4.67033e-84	9.06835e-81	5.94596	5.85345	3.70066	5.94956	3.88355	3.65696
Solyc02g070020.1.1	IPR002213	101257330	UDP-Glycosyltransferase superfamily protein	-1.73451	9.46903	328.445	2.09611e-73	3.77928e-70	10.083	10.0806	8.41845	10.1059	8.3587	8.28613
Solyc06g076700.1.1	IPR008004	101261240	Protein of unknown function (DUF740)	-2.27652	4.31882	323.852	2.09808e-72	3.53065e-69	5.07535	4.90561	2.86771	5.14217	2.77876	2.66213
Solyc10g038080.2.1	IPR001381	101258500	dehydroquinate dehydratase, putative / shikimate dehydrogenase, putative	-2.55948	3.59943	319.882	1.53673e-71	2.42438e-68	4.43665	4.24444	1.68953	4.41722	1.95268	1.76626
Solyc06g008870.2.1	IPR013094		alpha/beta-Hydrolases superfamily protein	-1.74414	5.89566	311.265	1.15779e-69	1.71911e-66	6.48698	6.54825	4.82323	6.51748	4.75884	4.73975
Solyc04g011520.3.1	IPR017441	101260038	Protein kinase superfamily protein	-1.76024	5.76657	308.37	4.94587e-69	6.93576e-66	6.3568	6.43197	4.68578	6.38714	4.58154	4.62961
Solyc04g012140.1.1				-2.41289	6.84176	307.172	9.02291e-69	1.19872e-65	7.63081	7.59668	5.3163	7.5506	5.32121	4.85815
Solyc02g092790.3.1			arabinogalactan protein 18	1.98593	6.89298	302.949	7.50491e-68	9.47194e-65	5.42582	5.66987	7.68109	5.6361	7.48345	7.52948
Solyc02g090360.3.1	IPR011707	101252344	SKU5 similar 17	2.22439	6.93201	302.662	8.66536e-68	1.04158e-64	5.27737	5.36473	7.57479	5.61498	7.56337	7.80204
Solyc10g047030.3.1	IPR001764		beta-D-xylosidase 4	-1.84748	4.8019	302.22	1.08186e-67	1.24129e-64	5.41125	5.51536	3.64735	5.40956	3.56101	3.59009
Solyc02g014430.3.1	IPR002259	101261275	Major facilitator superfamily protein	-4.08685	2.68781	301.643	1.44485e-67	1.58569e-64	3.46578	3.84568	-0.932039	3.45874	-0.129682	-0.539529
Solyc08g080540.3.1	IPR011991	101267632	winged-helix DNA-binding transcription factor family protein	1.98311	4.65319	295.184	3.68959e-66	3.88052e-63	3.39212	3.19597	5.33788	3.41543	5.23721	5.38866
Solyc04g074840.3.1	IPR002528	101243781	MATE efflux family protein	-1.59624	7.49996	278.442	1.64095e-62	1.65684e-59	8.03255	8.11647	6.53272	8.11161	6.48801	6.45224
Solyc12g088980.2.1	IPR015943	101267878	Transducin/WD40 repeat-like superfamily protein	2.05476	4.23799	274.984	9.30421e-62	9.03295e-59	2.75841	2.86774	4.99795	2.95953	4.79725	4.95766
Solyc09g082340.2.1	IPR014710		cupin family protein	-7.83599	7.86752	274.695	1.07569e-61	1.00565e-58	9.43914	8.48913	1.48373	8.416	1.31002	-0.20668
Solyc09g082720.3.1	IPR023210		NAD(P)-linked oxidoreductase superfamily protein	-1.7977	6.77279	273.805	1.68125e-61	1.51565e-58	7.45979	7.43578	5.73397	7.32339	5.60103	5.48612
Solyc01g091910.4.1	IPR000008		phospholipase D beta 1	2.2483	4.23088	268.34	2.61008e-60	2.27185e-57	2.59917	2.56086	4.85136	2.90489	4.89663	5.08301
Solyc09g083445.1.1	IPR000864		Serine protease inhibitor, potato inhibitor I-type family protein	-2.33502	4.21251	257.385	6.37515e-58	5.36405e-55	4.95808	4.84094	2.90947	5.03653	2.41468	2.48942
Solyc02g087210.3.1	IPR000058	101243659	zinc finger (AN1-like) family protein	2.04673	6.50371	255.607	1.55638e-57	1.26729e-54	5.12167	5.12121	7.33341	5.18435	6.93248	7.27192
Solyc06g030470.3.1	IPR010369		Domain of unknown function (DUF966)	-1.70854	6.0814	245.391	2.62569e-55	2.07118e-52	6.65499	6.75259	4.83412	6.67781	5.00844	5.10264
Solyc08g007845.1.1	IPR002528		MATE efflux family protein	-1.56203	8.55728	245.318	2.72369e-55	2.08337e-52	9.14301	9.11996	7.64446	9.14576	7.61625	7.4554
Solyc02g065280.3.1	IPR029058	101260990	methyl esterase 1	-1.97487	6.02119	239.364	5.41308e-54	4.01873e-51	6.68173	6.63016	4.65664	6.76476	4.52162	4.94433
Solyc01g095140.3.1	IPR013783	544031	Late embryogenesis abundant protein	2.31395	6.80241	235.577	3.62367e-53	2.61339e-50	5.23736	5.10709	7.66259	5.31581	7.19303	7.70194
Solyc02g063360.3.1	IPR000008		Calcium-dependent lipid-binding (CaLB domain) family protein	1.71607	8.20865	235.173	4.43775e-53	3.1116e-50	7.16586	7.06311	8.96771	7.09536	8.65881	8.83171
Solyc01g104740.3.1	IPR013729	544168	multiprotein bridging factor 1C	1.73542	4.85786	228.028	1.60511e-51	1.09503e-48	3.91598	3.65984	5.50249	3.62431	5.43347	5.48612
Solyc10g085030.1.1	IPR006917	101250355	SOUL heme-binding family protein	2.31015	2.96443	221.105	5.19159e-50	3.44858e-47	1.16915	1.4889	3.66696	1.44346	3.69492	3.68126
Solyc09g009220.3.1	IPR025486			-2.42019	3.34322	215.869	7.20114e-49	4.6608e-46	4.08914	4.02163	2.02966	4.15285	1.44518	1.50101
Solyc03g116630.3.1		101253674		-1.61864	6.85868	203.82	3.06429e-46	1.93372e-43	7.57722	7.3924	5.95749	7.37581	5.82825	5.70337
Solyc08g069065.1.1	IPR002659		Galactosyltransferase family protein	-1.43025	7.64041	203.402	3.77896e-46	2.32655e-43	8.28089	8.13898	6.82013	8.1294	6.7365	6.70521
Solyc08g021820.3.1	IPR000270	101055553	indole-3-acetic acid inducible 29	2.15568	3.63294	200.009	2.07871e-45	1.2493e-42	2.26372	1.93505	4.33055	2.2892	4.1639	4.47836
Solyc07g052990.1.1				1.678	5.28398	197.046	9.21437e-45	5.40905e-42	4.38605	4.09144	5.98997	4.13516	5.78885	5.87995
Solyc11g008250.2.1	IPR027417	101265790	P-loop containing nucleoside triphosphate hydrolases superfamily protein	-1.51281	4.96017	196.475	1.22761e-44	7.04259e-42	5.59014	5.4911	4.03469	5.49064	4.10095	3.89371
Solyc09g074270.3.1	IPR029058	100736493	alpha/beta-Hydrolases superfamily protein	-1.42604	7.2726	194.112	4.02526e-44	2.2579e-41	7.76271	7.88232	6.4996	7.79951	6.31096	6.35301
Solyc06g072430.2.1	IPR000048		BCL-2-associated athanogene 5	1.57617	6.10113	192.471	9.18404e-44	5.03964e-41	5.2177	4.93188	6.70211	5.151	6.58895	6.75041
Solyc04g072760.3.1	IPR018045		sulfate transporter 1;3	-1.45025	5.54674	191.174	1.76204e-43	9.46326e-41	6.14248	6.05634	4.73074	6.08551	4.52381	4.6767
Solyc01g103030.3.1	IPR020846		Major facilitator superfamily protein	-2.48069	2.58576	190.018	3.15089e-43	1.65697e-40	3.2264	3.31134	0.674548	3.46348	0.916915	0.95437
Solyc05g005560.4.1	IPR004873		polygalacturonase 2	1.6162	5.79618	189.144	4.88832e-43	2.51818e-40	4.64127	4.83881	6.52803	4.82292	6.37161	6.24713
Solyc10g086690.2.1	IPR025749		Arabidopsis Inositol phosphorylceramide synthase 1	2.34686	5.45597	188.732	6.01275e-43	3.03548e-40	3.71917	3.73982	5.83712	4.05274	6.23237	6.44398
Solyc11g044910.2.1	IPR001764	101055558	beta-xylosidase 1	-1.68058	4.33574	185.054	3.81902e-42	1.89019e-39	4.91365	4.82808	3.11623	5.06951	3.31091	3.33837
Solyc07g062670.1.1				-1.71151	8.86367	184.344	5.45815e-42	2.64951e-39	9.55767	9.45126	7.99757	9.42489	7.68468	7.58902
Solyc07g056670.3.1	IPR026992	100037505	Arabidopsis thaliana gibberellin 2-oxidase 1	1.97709	9.59189	183.642	7.76674e-42	3.69902e-39	8.2878	8.01612	10.2096	8.5168	10.1371	10.4322
Solyc11g066510.2.1	IPR011016	101265001	RING/U-box superfamily protein	-2.31923	3.01289	181.605	2.16257e-41	1.01088e-38	3.80683	3.64525	1.68953	3.76516	1.48158	1.05697
Solyc02g086490.3.1	IPR000136	101258512	Oleosin family protein	-7.91266	3.28097	180.698	3.41199e-41	1.56592e-38	5.01177	4.02539	-2.85513	3.24993	-4.4948	-3.62629
Solyc09g082980.3.1	IPR006502	101261455	Protein of unknown function (DUF506)	1.45517	4.82606	178.63	9.65287e-41	4.35103e-38	3.86244	4.00268	5.41964	3.88645	5.2688	5.42508
Solyc04g063350.3.1	IPR029061	101254378	Thiamin diphosphate-binding fold (THDP-binding) superfamily protein	-1.42827	6.35905	177.069	2.1151e-40	9.3017e-38	7.00793	6.78566	5.45533	6.9049	5.40532	5.55786
Solyc11g072320.2.1	IPR001005		Sas10/U3 ribonucleoprotein (Utp) family protein	-1.61925	4.98025	177.049	2.13731e-40	9.3017e-38	5.59601	5.40425	3.81495	5.69867	4.03206	3.99734
Solyc07g047680.2.1	IPR001810		F-box family protein	-3.05523	1.73485	175.312	5.11668e-40	2.18907e-37	2.69856	2.46445	-0.437305	2.47882	-0.653501	-0.397051
Solyc04g078750.3.1	IPR004864	101250111		1.40221	4.71386	174.139	9.22849e-40	3.88243e-37	3.88563	3.8156	5.33635	3.82892	5.209	5.1899
Solyc01g099190.3.1	IPR001024		lipoxygenase 1	-1.49844	12.1436	173.97	1.00516e-39	4.1594e-37	12.5737	12.6404	11.1388	12.8861	11.2383	11.2444
Solyc10g080690.2.1	IPR016035	101268154	patatin-like protein 6	3.18333	1.94966	171.947	2.77936e-39	1.13156e-36	-0.260943	-0.54021	2.8592	-0.44954	2.497	2.90843
Solyc02g092490.3.1	IPR016181	101259010	Acyl-CoA N-acyltransferases (NAT) superfamily protein	1.38711	5.61044	171.901	2.84365e-39	1.13935e-36	4.67937	4.71623	6.13434	4.85749	6.06929	6.2149
Solyc01g098740.3.1	IPR008271	101259886	Protein kinase superfamily protein	-2.47494	2.37419	171.533	3.423e-39	1.35005e-36	3.05287	3.02624	0.674548	3.27169	0.717705	0.559291
Solyc05g053210.3.1	IPR011009		CBL-interacting protein kinase 1	-1.33962	8.31919	170.086	7.08671e-39	2.75204e-36	8.89488	8.72559	7.42265	8.88896	7.57789	7.49191
Solyc08g006410.3.1	IPR002213	101264651	UDP-glucosyltransferase 74F2	-1.27084	5.69267	169.589	9.09698e-39	3.47918e-36	6.2022	6.19131	4.93665	6.17986	4.85908	4.96427
Solyc10g086660.2.1	IPR005512	101250066	RHO guanyl-nucleotide exchange factor 7	-1.32161	6.31223	168.583	1.50892e-38	5.6848e-36	6.85575	6.77677	5.43831	6.84404	5.61339	5.45358
Solyc01g008910.2.1	IPR030008	101256615	scarecrow-like 3	-1.6362	3.60192	168.355	1.69229e-38	6.28188e-36	4.12206	4.24121	2.64845	4.21593	2.54078	2.48942
Solyc07g061950.3.1	IPR000008		Calcium-dependent lipid-binding (CaLB domain) family protein	1.79597	5.74695	167.023	3.30653e-38	1.20961e-35	4.61144	4.40024	6.24858	4.71788	6.2516	6.60664
Solyc09g008830.3.1			sequence-specific DNA binding transcription factors	1.47802	5.5655	165.725	6.35381e-38	2.29118e-35	4.69039	4.71623	6.25264	4.51394	6.09007	6.00794
Solyc02g065260.3.1	IPR012337			-2.20725	5.1322	164.177	1.38376e-37	4.91956e-35	5.96876	5.97993	3.35863	5.55969	3.56101	3.93808
Solyc09g061280.3.1	IPR003175	543785	inhibitor/interactor with cyclin-dependent kinase	1.72419	3.88561	163.786	1.68461e-37	5.90598e-35	2.9685	2.57119	4.56291	2.743	4.51944	4.40001
Solyc01g068080.3.1	IPR016040		NAD(P)-binding Rossmann-fold superfamily protein	-2.04883	3.99828	163.545	1.90179e-37	6.57603e-35	4.85415	4.69278	2.86771	4.47697	2.64875	2.35491
Solyc01g080020.2.1	IPR001461	101255625	Eukaryotic aspartyl protease family protein	-1.47987	3.824	162.314	3.53217e-37	1.18879e-34	4.35315	4.40601	2.90947	4.37262	2.9313	2.85247
Solyc02g068300.3.1	IPR001220	101268542	Concanavalin A-like lectin protein kinase family protein	-2.35601	2.85528	162.32	3.52208e-37	1.18879e-34	3.41355	3.55969	1.21726	3.76899	1.46349	0.980712
Solyc10g084170.1.1	IPR003103	101250069	BCL-2-associated athanogene 5	1.74668	3.89769	162.114	3.90666e-37	1.29753e-34	2.81588	2.76354	4.69536	2.71945	4.35013	4.47605
Solyc02g085600.1.1	IPR005202	101251641	GRAS family transcription factor	1.57278	4.43323	159.109	1.77136e-36	5.80683e-34	3.35936	3.47424	5.1186	3.4729	5.07248	4.82036
Solyc07g062700.3.1	IPR002048	101263533	sodium/calcium exchanger family protein / calcium-binding EF hand family protein	1.52758	8.43427	158.214	2.77843e-36	8.99144e-34	7.37288	7.42586	8.91011	7.61929	8.89904	9.18504
Solyc01g081610.3.1	IPR029018	100529103	beta-hexosaminidase 2	-1.22982	7.6513	157.601	3.783e-36	1.20874e-33	8.10494	8.19597	6.99714	8.11312	6.85915	6.86665
Solyc02g089530.3.1				3.80515	2.71765	156.625	6.18056e-36	1.95012e-33	-0.83766	-0.222301	3.05799	0.221446	3.60704	3.9581
Solyc10g084325.1.1	IPR022398		Subtilisin-like serine endopeptidase family protein	1.44452	5.19266	156.064	8.19657e-36	2.55429e-33	4.33361	4.23797	5.64281	4.30565	5.64883	5.90424
Solyc05g050220.3.1	IPR012900	101252588	G-box binding factor 3	1.81268	4.66375	155.079	1.34554e-35	4.14198e-33	3.37583	3.45764	5.08618	3.6073	5.21712	5.54468
Solyc06g073245.1.1	IPR011992		Calcium-binding EF-hand family protein	1.79422	6.13951	154.081	2.22361e-35	6.76246e-33	4.89662	4.82161	6.87439	5.18722	6.5157	6.89636
Solyc05g024260.3.1	IPR004316	101255592	homolog of Medicago truncatula MTN3	1.28508	8.39652	153.002	3.82762e-35	1.1502e-32	7.52955	7.60707	8.9827	7.70298	8.92022	8.79089
Solyc05g008380.3.1				-1.64144	4.41283	152.413	5.14787e-35	1.52874e-32	5.12654	5.08023	3.2128	4.80251	3.46429	3.40796
Solyc01g009430.3.1		101247149		-1.24757	7.03505	152.201	5.72685e-35	1.6809e-32	7.57157	7.50069	6.38585	7.50884	6.26992	6.17766
Solyc11g072380.2.1	IPR011051	101246214	RmlC-like cupins superfamily protein	-5.48336	3.88206	151.75	7.18671e-35	2.08514e-32	5.58896	4.22168	-0.437305	4.29241	-0.243902	-1.44759
Solyc08g016440.3.1				1.65623	6.41975	151.666	7.49751e-35	2.15059e-32	5.27004	5.20317	7.02258	5.58814	6.86218	7.16182
Solyc10g008470.3.1	IPR006816		ELMO/CED-12 family protein	-1.54602	4.13352	151.553	7.93275e-35	2.24987e-32	4.81441	4.76202	3.14448	4.52531	3.16187	3.17115
Solyc03g093140.3.1	IPR011701	101259222	phosphate starvation-induced gene 3	-1.75403	4.6652	150.747	1.1902e-34	3.33812e-32	5.46997	5.31183	3.71956	5.0539	3.44598	3.42725
Solyc12g099430.2.1	IPR000073	101263888	alpha/beta-Hydrolases superfamily protein	1.40181	5.48474	150.494	1.3517e-34	3.74941e-32	4.54502	4.48186	6.03123	4.80064	6.04289	5.98209
Solyc02g067120.3.1	IPR018971		Protein of unknown function (DUF1997)	1.90203	4.52542	150.176	1.58686e-34	4.35386e-32	3.23846	3.24839	4.87052	3.33505	5.16211	5.43821
Solyc08g079750.3.1	IPR004838	101257494	ACC synthase 10	-1.52486	3.62322	149.792	1.92496e-34	5.22472e-32	4.26452	4.10216	2.62858	4.19046	2.68822	2.67025
Solyc02g086402.1.1			CTP synthase family protein	2.86099	1.98778	149.06	2.78243e-34	7.4717e-32	-0.131137	0.308746	2.59825	-0.522549	2.74921	2.92208
Solyc06g048840.3.1	IPR022377	101252190	Stress induced protein	-8.15095	5.77974	148.413	3.85329e-34	1.02384e-31	7.71442	6.08454	-0.818589	5.66001	-1.11466	-2.71413
Solyc03g083560.1.1	IPR006766	101250380	EXORDIUM like 3	-2.13569	2.72574	148.307	4.06507e-34	1.06886e-31	3.51123	3.34181	1.46144	3.40069	1.40784	0.95437
Solyc07g054790.1.1	IPR022251	101253603	Wound-responsive family protein	1.31008	6.35272	146.662	9.30304e-34	2.4209e-31	5.54351	5.66385	6.95039	5.4423	6.86562	6.76517
Solyc08g080490.3.1	IPR016140	101268495	seed storage albumin 5	-8.57677	7.22957	146.007	1.29363e-33	3.33202e-31	8.92749	7.78005	0.750054	7.58005	-1.00988	-2.15967
Solyc01g081450.3.1		101261656		1.24823	7.24706	145.384	1.77008e-33	4.51316e-31	6.40909	6.46002	7.70619	6.59718	7.68004	7.82744
Solyc04g007000.1.1	IPR001471	101259430	related to ABI3/VP1 1	-1.42729	4.62102	143.565	4.42279e-33	1.1164e-30	5.21159	5.01555	3.85398	5.2461	3.61526	3.73254
Solyc09g011160.3.1	IPR009091		Regulator of chromosome condensation (RCC1) family protein	1.92812	3.62619	142.271	8.48319e-33	2.12013e-30	2.33285	2.41944	4.04971	2.29983	4.20257	4.53279
Solyc08g079090.3.1	IPR001117		Cupredoxin superfamily protein	2.38704	4.18096	139.968	2.70586e-32	6.69621e-30	2.33285	2.24984	4.66642	2.91183	4.83466	5.20255
Solyc06g066800.2.1	IPR029044	101245769	Nucleotide-diphospho-sugar transferases superfamily protein	1.6126	5.03574	139.246	3.89227e-32	9.53872e-30	4.11554	3.87515	5.63412	4.03058	5.38745	5.81738
Solyc01g067890.3.1	IPR009014		Deoxyxylulose-5-phosphate synthase	-1.22485	8.78912	138.096	6.94446e-32	1.66168e-29	9.16233	9.27999	8.13066	9.37512	8.04729	7.96862
Solyc08g080380.3.1	IPR001128	101245278	cytochrome P450, family 76, subfamily C, polypeptide 4	-1.53991	3.47258	138.086	6.97796e-32	1.66168e-29	4.07239	4.02163	2.63855	4.02419	2.50586	2.35491
Solyc12g098130.1.1		104645225		-9.04688	2.98151	138.099	6.93288e-32	1.66168e-29	4.86001	2.78144	-6.7078	3.47759	-6.7078	-3.62629
Solyc11g066890.1.1	IPR002912	101247693	arogenate dehydratase 6	1.20748	7.61979	137.985	7.34336e-32	1.73235e-29	6.94401	6.75372	8.13419	6.96997	8.05014	8.11479
Solyc10g024420.2.1	IPR003593		multidrug resistance-associated protein 9	-1.44725	9.44185	137.386	9.92914e-32	2.32066e-29	9.96192	9.91101	8.30176	10.094	8.65358	8.64835
Solyc07g041750.3.1	IPR019378	101254314	O-fucosyltransferase family protein	1.36826	5.64499	136.946	1.23891e-31	2.86905e-29	4.75478	4.73012	5.9987	4.91219	6.20949	6.28528
Solyc08g080480.3.1	IPR016140	101268783	seed storage albumin 1	-7.0932	5.3246	136.911	1.2609e-31	2.89341e-29	7.12543	5.83214	-0.00608918	5.39476	-0.734687	-2.41043
Solyc03g005940.3.1	IPR010686	101246315	Protein of unknown function (DUF1264)	-7.31858	3.39308	136.601	1.47387e-31	3.35165e-29	5.29912	3.58539	-2.46527	3.47759	-3.13381	-3.09929
Solyc09g098120.3.1	IPR010686	101262752	Protein of unknown function (DUF1264)	-5.55722	4.36487	136.402	1.62983e-31	3.67324e-29	6.1968	4.67613	-0.136014	4.46285	-0.304592	-0.20668
Solyc02g077670.3.1	IPR001623	101262478	DNAJ heat shock family protein	1.19385	7.32743	135.001	3.29939e-31	7.35513e-29	6.69711	6.56191	7.90201	6.56561	7.71605	7.7865
Solyc07g064790.3.1				-10.6371	1.94509	134.988	3.32179e-31	7.35513e-29	3.78232	2.10101	-6.7078	2.26771	-6.7078	-6.7078
Solyc08g007240.3.1	IPR015797		nudix hydrolase homolog 8	-2.72054	2.69305	134.374	4.52592e-31	9.9342e-29	3.18338	3.87098	0.890153	3.30372	0.68686	0.724282
Solyc05g005170.3.1	IPR000743	101246713	Pectin lyase-like superfamily protein	-5.19447	0.392729	133.269	7.89537e-31	1.71806e-28	1.40143	1.51052	-4.25303	0.944669	-3.13381	-4.4652
Solyc09g011740.3.1	IPR025749		Arabidopsis Inositol phosphorylceramide synthase 2	1.24373	6.11011	132.676	1.0643e-30	2.29615e-28	5.31914	5.36027	6.68056	5.38855	6.44199	6.66618
Solyc02g031960.3.1	IPR007524	101250752	Pectate lyase family protein	1.33663	4.11242	132.351	1.25376e-30	2.68199e-28	3.25042	3.37755	4.67371	3.2334	4.66502	4.52833
Solyc06g060090.3.1	IPR001623	101265552	Chaperone DnaJ-domain superfamily protein	1.3792	6.31994	131.865	1.60149e-30	3.39704e-28	5.44417	5.30721	6.73384	5.63715	6.84001	6.96353
Solyc02g082690.3.1	IPR017986	101257625	Transducin/WD40 repeat-like superfamily protein	-1.36283	7.72052	131.823	1.63594e-30	3.4412e-28	8.28198	8.11228	6.68718	8.3355	6.99401	6.94984
Solyc07g049140.3.1	IPR009632	543980		-1.52266	12.7592	131.487	1.93706e-30	4.04092e-28	13.4394	13.3212	12.0396	13.2158	11.7478	11.5938
Solyc09g065660.3.1	IPR027725		heat shock transcription factor A6B	2.65073	2.13566	131.415	2.00897e-30	4.15659e-28	0.385108	0.15249	2.54625	0.176024	3.00191	3.05199
Solyc12g088460.2.1	IPR017972		cytochrome P450, family 81, subfamily D, polypeptide 3	1.40802	5.62046	131.063	2.39918e-30	4.92359e-28	4.81441	4.59497	6.24939	4.82292	5.96308	6.24033
Solyc10g055760.2.1	IPR003441	101267943	NAC domain containing protein 36	1.33439	5.98136	128.431	9.03194e-30	1.83858e-27	5.06353	5.02684	6.46431	5.37103	6.5091	6.51836
Solyc08g082210.3.1	IPR001471		Integrase-type DNA-binding superfamily protein	1.54502	5.73409	127.026	1.83329e-29	3.70206e-27	4.86001	4.77324	6.54204	4.64474	6.08268	6.25928
Solyc00g005094.1.1				-1.60526	5.29491	126.844	2.0101e-29	4.0269e-27	5.90114	6.06549	4.22534	5.65692	4.47499	4.10902
Solyc03g098480.1.1				1.21155	5.00253	126.422	2.48541e-29	4.93991e-27	4.40222	4.16145	5.4791	4.23266	5.52241	5.4394
Solyc03g118050.3.1				-6.16474	1.32138	125.989	3.09255e-29	6.0986e-27	2.93183	1.69179	-3.391	1.87155	-4.4948	-3.62629
Solyc04g081550.3.1	IPR017949	101265231	Pathogenesis-related thaumatin superfamily protein	-1.28603	4.57391	125.684	3.60608e-29	7.02817e-27	5.14908	4.92183	3.71956	5.14217	3.80674	3.83716
Solyc03g019820.3.1	IPR023271	101251154	beta-tonoplast intrinsic protein	-5.54898	5.02901	125.676	3.61961e-29	7.02817e-27	6.79017	5.71945	0.92315	4.8321	0.374835	-0.0924281
Solyc08g081850.1.1	IPR010605	101256997	Protein of unknown function (DUF1191)	-2.89542	1.46046	125.189	4.62728e-29	8.91616e-27	2.35517	2.2239	-0.713414	2.1784	-0.129682	-1.31351
Solyc02g071760.3.1	IPR010686		Protein of unknown function (DUF1264)	-6.62453	2.20938	124.998	5.09476e-29	9.74257e-27	4.00692	2.55046	-3.391	2.42159	-3.13381	-3.62629
Solyc08g078510.3.1	IPR004182	101259275	GRAM domain family protein	1.22376	7.69585	123.869	8.99951e-29	1.70801e-26	6.93755	6.92603	8.03862	7.00692	8.14662	8.34118
Solyc11g013500.1.1		104644498		1.50732	3.51553	122.842	1.51001e-28	2.84446e-26	2.56127	2.51881	4.22534	2.60415	3.99162	3.98438
Solyc06g076690.3.1	IPR006683		Thioesterase superfamily protein	-1.29762	6.71246	121.842	2.49999e-28	4.67442e-26	7.22804	7.27966	6.10857	7.1474	5.89133	5.74431
Solyc10g080840.1.1	IPR001128	101246390	cytochrome P450, family 96, subfamily A, polypeptide 1	-1.19011	9.5125	121.651	2.75209e-28	5.07067e-26	10.1077	9.83339	8.86624	10.0098	8.79045	8.73432
Solyc01g090460.3.1	IPR017970	544105	homeobox-leucine zipper protein 4	-3.73989	0.611047	121.656	2.74569e-28	5.07067e-26	1.67429	1.25274	-1.90594	1.40461	-2.44613	-2.41043
Solyc04g079420.3.1	IPR032675	101264419	ADR1-like 1	1.11708	5.33152	121.498	2.97373e-28	5.43934e-26	4.57624	4.69514	5.72931	4.71788	5.79067	5.82194
Solyc12g098900.2.1		101250584	Late embryogenesis abundant protein (LEA) family protein	-4.84776	3.85346	120.404	5.16133e-28	9.37283e-26	5.62156	4.01786	0.0547338	4.1876	0.121637	-0.330763
Solyc04g072895.1.1	IPR001680		Transducin/WD40 repeat-like superfamily protein	-1.3754	7.25705	117.981	1.75093e-27	3.15693e-25	7.73584	7.97418	6.23714	7.62748	6.51515	6.46454
Solyc10g078780.2.1	IPR005513	101250176	Late Embryogenesis Abundant 4-5	-7.48554	1.94103	117.938	1.78912e-27	3.2029e-25	3.76575	2.30036	-4.25303	2.07083	-3.65943	-6.7078
Solyc09g091430.3.1	IPR011050	101254639	Pectin lyase-like superfamily protein	1.02513	7.03417	117.911	1.81306e-27	3.2229e-25	6.37603	6.45027	7.43414	6.46651	7.43787	7.49677
Solyc07g008290.3.1	IPR019378		O-fucosyltransferase family protein	-7.20308	2.77493	116.99	2.88461e-27	5.09184e-25	4.64581	3.10652	-3.391	2.81144	-2.44613	-6.7078
Solyc06g060340.3.1	IPR023329	101260830	Chlorophyll A-B binding family protein	1.44441	5.9565	116.125	4.46222e-27	7.82189e-25	4.80024	5.19651	6.66296	5.14806	6.4022	6.43031
Solyc09g015070.3.1	IPR023210	101267438	NAD(P)-linked oxidoreductase superfamily protein	-6.62511	2.0254	115.981	4.79882e-27	8.35392e-25	3.7782	2.12924	-2.46527	2.54285	-3.65943	-6.7078
Solyc11g013310.2.1	IPR013057	100736478	like AUX1 3	1.49003	4.42271	115.878	5.05437e-27	8.73852e-25	3.2264	3.57002	5.0493	3.63274	5.0605	4.80938
Solyc07g055930.3.1	IPR029044	101256305	galacturonosyltransferase 15	-1.13003	4.84269	115.824	5.19487e-27	8.92033e-25	5.31914	5.23923	4.2645	5.33014	4.07736	4.1589
Solyc10g007600.3.1	IPR012133	100134875	Aldolase-type TIM barrel family protein	-1.10359	8.11376	115.746	5.40274e-27	9.21459e-25	8.49458	8.6618	7.51517	8.52489	7.35538	7.50047
Solyc10g081950.2.1			Late embryogenesis abundant (LEA) hydroxyproline-rich glycoprotein family	3.41091	0.563306	115.412	6.39426e-27	1.08325e-24	-2.58463	-2.17479	1.39243	-1.57869	1.28964	1.36763
Solyc04g079430.3.1	IPR006043		Xanthine/uracil permease family protein	1.14578	6.12988	114.885	8.34091e-27	1.40361e-24	5.44417	5.38242	6.44668	5.50334	6.64217	6.67024
Solyc11g072110.2.1	IPR005123		2-oxoglutarate (2OG) and Fe(II)-dependent oxygenase superfamily protein	1.21208	4.28733	114.858	8.45341e-27	1.41312e-24	3.48109	3.49066	4.82104	3.67008	4.7079	4.76081
Solyc03g123540.3.1	IPR008978	101248279	HSP20-like chaperones superfamily protein	1.38511	3.71228	114.443	1.04226e-26	1.73084e-24	2.99006	2.88439	4.23523	2.66295	4.18336	4.28316
Solyc01g098570.2.1	IPR021410		Protein of unknown function (DUF3049)	1.28107	5.76939	113.473	1.70017e-26	2.80494e-24	5.12004	4.76652	6.35897	5.0539	6.25686	6.18971
Solyc03g006960.3.1	IPR000222		Protein phosphatase 2C family protein	1.47304	5.28978	113.053	2.10084e-26	3.44346e-24	4.14787	4.36803	5.63661	4.56108	5.90228	5.9657
Solyc06g036110.1.1	IPR000008	101263030	Calcium-dependent lipid-binding (CaLB domain) family protein	1.23153	7.01004	112.404	2.91431e-26	4.746e-24	6.23868	6.19466	7.66045	6.3582	7.32877	7.48417
Solyc03g118130.3.1	IPR024935	101245339	Rubredoxin-like superfamily protein	1.08855	5.11321	112.006	3.56313e-26	5.76542e-24	4.47539	4.43457	5.61026	4.48397	5.45422	5.59244
Solyc09g082100.3.1	IPR007011		Seed maturation protein	-6.93689	2.88204	111.946	3.67115e-26	5.90237e-24	4.75688	2.98821	-2.15867	3.12403	-2.74938	-6.7078
Solyc01g098850.3.1	IPR016040	101262257	NAD(P)-binding Rossmann-fold superfamily protein	-6.54667	4.41765	111.873	3.80994e-26	6.08673e-24	6.29967	4.62501	-0.437305	4.54331	-1.00988	-2.71413
Solyc02g084117.1.1				3.26694	0.933033	111.542	4.50067e-26	7.14503e-24	-2.27936	-1.52028	1.81789	-1.06092	1.48158	1.85438
Solyc02g081030.3.1	IPR032880		ERD (early-responsive to dehydration stress) family protein	1.19253	6.45568	111.064	5.73034e-26	9.04033e-24	5.69012	5.68896	6.83971	5.83002	6.84132	7.09519
Solyc07g032385.1.1	IPR002885		protein kinase family protein	1.57355	6.56378	110.915	6.17549e-26	9.68209e-24	5.52393	5.3558	7.01112	5.79665	7.01201	7.37792
Solyc02g084130.3.1				3.66861	1.34498	110.833	6.43819e-26	1.00317e-23	-2.02753	-1.70728	1.78237	-0.956059	2.0407	2.57836
Solyc11g067250.2.1	IPR001357	101267967	NAD+ ADP-ribosyltransferases;NAD+ ADP-ribosyltransferases	-7.61768	2.07582	109.548	1.23084e-25	1.90607e-23	3.93464	1.91897	-4.25303	2.54285	-3.65943	-6.7078
Solyc01g006825.1.1	IPR000782		FASCICLIN-like arabinogalactan protein 17 precursor	1.37915	5.51918	109.504	1.25864e-25	1.93722e-23	4.74636	4.46534	6.09958	4.7704	5.83969	6.18122
Solyc02g065240.3.1	IPR029058		methyl esterase 1	-1.19346	7.46773	109.444	1.29748e-25	1.98491e-23	7.93657	8.00925	6.82941	7.88359	6.54502	6.8578
Solyc11g020720.1.1			Hydrolase-like protein family	-1.24857	3.84247	109.313	1.38602e-25	2.10759e-23	4.31094	4.29826	3.13042	4.38015	3.15625	2.95567
Solyc05g053630.1.1				-7.68207	2.51203	109.285	1.4054e-25	2.12425e-23	4.35315	3.24194	-3.391	2.0458	-6.7078	-3.62629
Solyc09g010210.3.1	IPR008928	543996	glycosyl hydrolase 9B1	-1.10755	10.1241	108.392	2.20539e-25	3.3136e-23	10.6913	10.4902	9.35712	10.5329	9.47615	9.55909
Solyc04g079660.2.1	IPR001128		cytochrome P450, family 82, subfamily C, polypeptide 4	-3.19983	1.27795	108.031	2.64597e-25	3.9288e-23	2.44117	1.71059	-1.33833	2.0458	-0.9122	-1.07779
Solyc01g098860.3.1		101262564	Glycoprotein membrane precursor GPI-anchored	-7.26803	1.73686	108.037	2.63857e-25	3.9288e-23	3.54075	2.2879	-3.391	1.67333	-4.4948	-6.7078
Solyc09g092500.1.1	IPR002213		UDP-Glycosyltransferase superfamily protein	-1.24312	9.69142	107.687	3.14717e-25	4.64566e-23	10.2078	10.2212	9.13505	10.1176	8.92084	8.73625
Solyc04g039730.3.1	IPR013320	101258453	NSP-interacting kinase 3	-1.21535	4.65113	106.755	5.03859e-25	7.39443e-23	5.13302	5.0212	3.79281	5.23229	4.05941	3.87978
Solyc05g014280.3.1	IPR002068		heat shock protein 21	1.4054	4.34301	106.459	5.84788e-25	8.5325e-23	3.48616	3.33576	4.92855	3.57266	4.6471	5.02407
Solyc10g017960.2.1	IPR025886	101248523	phloem protein 2-A13	-1.31629	4.16397	106.334	6.22962e-25	9.03724e-23	4.62069	4.71623	3.54507	4.67974	3.37035	3.13643
Solyc08g082870.3.1	IPR002347	101244694	NAD(P)-binding Rossmann-fold superfamily protein	-1.00625	5.3447	105.888	7.80137e-25	1.12527e-22	5.76186	5.80833	4.77434	5.70867	4.74205	4.74553
Solyc03g095780.2.1	IPR023393		Polyketide cyclase/dehydrase and lipid transport superfamily protein	2.70158	1.10788	105.845	7.97306e-25	1.1435e-22	-1.05595	-1.07168	1.90306	-0.522549	1.69812	1.9239
Solyc07g053165.1.1	IPR011009		protein kinase family protein	1.02512	5.35963	105.812	8.10862e-25	1.15637e-22	4.69477	4.83023	5.80207	4.73755	5.73992	5.79714
Solyc09g005120.3.1	IPR001623	101256620	DNAJ heat shock N-terminal domain-containing protein	1.19224	4.5501	105.688	8.63215e-25	1.22412e-22	3.87794	3.75801	4.90397	3.84714	4.98168	5.16283
Solyc04g064610.3.1	IPR004316	101258946	Nodulin MtN3 family protein	-1.168	4.28407	105.226	1.08987e-24	1.5369e-22	4.73151	4.82593	3.48556	4.68987	3.69492	3.55107
Solyc08g006800.2.1				-6.70569	2.10376	105.198	1.10508e-24	1.54969e-22	3.93834	2.33713	-2.46527	2.31038	-3.65943	-6.7078
Solyc10g011740.3.1	IPR000608	101260872	ubiquitin-conjugating enzyme 28	1.04314	6.52825	105.108	1.15669e-24	1.6131e-22	5.84506	5.96923	7.05597	5.92231	6.92919	6.87808
Solyc02g062770.2.1				-6.27699	1.42606	105.049	1.19135e-24	1.6523e-22	3.1261	1.44466	-4.25303	2.05837	-4.4948	-3.09929
Solyc00g157087.1.1	IPR003465			-5.72425	0.623851	104.862	1.30933e-24	1.80602e-22	2.10151	0.970203	-2.85513	1.32361	-4.4948	-6.7078
Solyc06g066550.3.1	IPR011685	101251594	LETM1-like protein	-1.2005	5.37349	104.467	1.5987e-24	2.19317e-22	5.83318	5.93566	4.44574	5.78062	4.69633	4.78343
Solyc11g064850.2.1		101260693		-1.19451	6.06365	103.97	2.05431e-24	2.80297e-22	6.6762	6.32239	5.33941	6.5961	5.34239	5.35381
Solyc08g069060.3.1	IPR025298		Galactosyltransferase family protein	-1.28991	3.67854	103.654	2.40952e-24	3.26995e-22	4.19505	4.21511	3.03553	4.12324	2.88449	2.7413
Solyc01g028805.1.1	IPR001128		cytochrome P450, family 716, subfamily A, polypeptide 1	-1.29283	3.37597	103.48	2.63077e-24	3.55111e-22	3.90845	3.86259	2.57768	3.85437	2.51467	2.65397
Solyc08g007820.1.1	IPR001471	104648613	C-repeat-binding factor 4	1.29763	6.53325	103.281	2.90902e-24	3.88516e-22	5.67023	5.62225	7.14302	5.91456	6.83298	7.12281
Solyc06g062670.3.1	IPR007087	101244006	indeterminate(ID)-domain 11	-1.28445	3.67122	102.935	3.46336e-24	4.60116e-22	4.13502	4.10216	2.95805	4.26285	2.93786	2.75663
Solyc12g096930.2.1	IPR007736	101244941	seed gene 1	-6.37004	2.33345	102.894	3.53594e-24	4.673e-22	4.16377	2.65123	-1.90594	2.46	-3.65943	-4.4652
Solyc06g053620.3.1	IPR008271		phosphoenolpyruvate carboxylase kinase 1	-1.36934	6.11383	102.879	3.56177e-24	4.68262e-22	6.67842	6.85121	5.27376	6.35056	5.30225	5.23847
Solyc07g044890.1.1				-6.32431	0.809492	102.245	4.90624e-24	6.41675e-22	2.40952	1.44466	-6.7078	1.07411	-6.7078	-3.09929
Solyc09g082690.3.1	IPR022796	101257109	Chlorophyll A-B binding family protein	1.15691	8.90789	102.169	5.09755e-24	6.63259e-22	8.17897	8.32799	9.49399	8.13461	9.19458	9.4144
Solyc02g084167.1.1				3.33445	1.60291	101.704	6.44576e-24	8.30122e-22	-2.02753	-0.295455	2.04473	-0.858309	2.35707	2.74899
Solyc07g005330.3.1	IPR017853	100191128	O-Glycosyl hydrolases family 17 protein	1.22405	6.21223	101.672	6.55111e-24	8.39407e-22	5.3721	5.42716	6.62273	5.60645	6.57217	6.87545
Solyc04g072250.3.1	IPR008978	101261225	HSP20-like chaperones superfamily protein	-6.00872	3.98687	101.112	8.6942e-24	1.10838e-21	5.86853	4.31372	-0.615387	3.93498	-0.653501	-2.41043
Solyc06g064650.3.1	IPR002347		hydroxysteroid dehydrogenase 5	-6.34416	1.20374	101.089	8.79422e-24	1.1155e-21	2.92438	1.63386	-3.391	1.44346	-3.65943	-6.7078
Solyc06g072130.3.1	IPR023271	101250514	beta-tonoplast intrinsic protein	-6.291	3.01966	100.957	9.40014e-24	1.18639e-21	4.82044	3.68383	-2.15867	2.78899	-1.48423	-4.4652
Solyc04g008110.3.1	IPR006189	101262506	CHASE domain containing histidine kinase protein	-1.02774	6.12735	100.91	9.62611e-24	1.20887e-21	6.55365	6.50918	5.39633	6.588	5.59896	5.56332
Solyc12g010920.2.1	IPR000136	101259407	Oleosin family protein	-7.08232	4.64426	100.248	1.34447e-23	1.67178e-21	6.50206	4.75524	-1.33833	4.96155	-0.576642	-4.4652
Solyc12g087950.1.1	IPR005175	101248856	Predicted AT-hook DNA-binding family protein	1.52198	3.80005	100.224	1.36089e-23	1.6839e-21	2.9685	2.77252	4.5991	2.76618	4.15829	4.29371
Solyc05g009420.1.1		101255885		1.09262	6.84865	99.196	2.28709e-23	2.81614e-21	6.22738	6.09799	7.43342	6.26908	7.18166	7.25245
Solyc07g049670.3.1	IPR023213		HXXXD-type acyl-transferase family protein	1.00144	4.99477	99.124	2.37175e-23	2.90619e-21	4.37517	4.45702	5.44968	4.38265	5.42181	5.34623
Solyc04g064710.3.1	IPR016040	101261114	alcohol dehydrogenase 1	-6.84711	1.67494	98.3314	3.53905e-23	4.29484e-21	3.52606	1.74748	-6.7078	1.95459	-3.65943	-3.62629
Solyc02g071060.3.1	IPR030182	101263078	Drug/metabolite transporter superfamily protein	-2.48443	1.33915	98.1992	3.78339e-23	4.5694e-21	1.99179	2.31272	-0.615387	1.89976	-0.367947	-0.267388
Solyc05g055910.3.1	IPR002902		Plant protein of unknown function (DUF946)	-1.39657	3.61886	97.9091	4.38039e-23	5.26523e-21	4.22869	3.98348	2.63855	4.21873	2.9313	2.66213
Solyc03g112040.1.1	IPR002401	101247511	cytochrome P450, family 71, subfamily A, polypeptide 25	1.2508	3.44413	97.5732	5.19006e-23	6.20889e-21	2.72451	2.70848	3.98867	2.59555	3.89709	3.89371
Solyc07g053290.3.1	IPR011598	101260837	basic helix-loop-helix (bHLH) DNA-binding superfamily protein	-1.90653	1.9925	97.1119	6.55186e-23	7.80103e-21	2.77507	2.58144	0.750054	2.53387	0.68686	0.755131
Solyc02g093290.3.1	IPR007229	101264576	nicotinate phosphoribosyltransferase 2	-1.00062	8.73517	97.0204	6.86154e-23	8.13141e-21	9.20808	9.17748	8.22527	9.06104	8.04197	8.17574
Solyc03g044790.3.1	IPR029058	544264	methyl esterase 3	-1.50232	3.24872	96.8261	7.56936e-23	8.92831e-21	3.76575	3.76702	2.132	3.87938	2.169	2.561
Solyc10g008880.3.1		101251820	vascular plant one zinc finger protein	1.12061	5.38053	96.1353	1.07296e-22	1.25388e-20	4.55228	4.7139	5.8892	4.85028	5.7305	5.87118
Solyc01g100830.2.1	IPR029044	544174	galactinol synthase 1	-6.92672	2.49945	96.0671	1.11057e-22	1.29185e-20	4.38334	3.01871	-3.391	2.20125	-2.44613	-6.7078
Solyc07g007710.3.1	IPR003614		low-molecular-weight cysteine-rich 69	-6.39336	2.00105	95.8743	1.22417e-22	1.41745e-20	3.85462	2.40797	-2.46527	1.92744	-3.65943	-4.4652
Solyc06g075990.3.1	IPR029068	101251387	dessication-induced 1VOC superfamily protein	-5.28019	2.12614	95.5843	1.41727e-22	1.62612e-20	3.86633	2.73627	-1.90594	2.05837	-1.79654	-3.09929
Solyc02g086650.3.1	IPR004853	101255257	phosphoenolpyruvate (pep)/phosphate translocator 2	1.99775	2.30499	94.6701	2.24909e-22	2.56885e-20	1.0094	0.696051	2.7253	1.1228	2.9313	3.16542
Solyc09g090800.2.1	IPR008390	101267061	AWPM-19-like family protein	-6.41587	3.72044	93.5932	3.8751e-22	4.38633e-20	5.63872	4.02163	-1.5039	3.59008	-1.00988	-3.62629
Solyc09g008200.3.1	IPR006121		Heavy metal transport/detoxification superfamily protein	-1.0867	8.05785	93.5229	4.01526e-22	4.5247e-20	8.58959	8.50133	7.579	8.40605	7.34892	7.29997
Solyc08g082990.3.1	IPR004813		oligopeptide transporter 7	-1.41295	5.49386	92.8566	5.62254e-22	6.30774e-20	5.97418	6.23661	4.85564	5.86175	4.56679	4.40488
Solyc07g053750.1.1	IPR000571	101249100	Zinc finger C-x8-C-x5-C-x3-H type family protein	-6.59602	1.7405	92.3611	7.2219e-22	8.06616e-20	3.62125	1.69179	-3.391	2.02032	-3.65943	-4.4652
Solyc11g069960.2.1	IPR032675	101246212	leucine-rich repeat transmembrane protein kinase family protein	3.02007	0.961937	92.1399	8.07591e-22	8.94088e-20	-1.31325	-1.70728	1.5903	-0.956059	1.48158	2.04119
Solyc02g092000.3.1	IPR029063	101245514		1.06626	4.84636	91.9697	8.80131e-22	9.70142e-20	4.23773	4.12337	5.22993	4.27097	5.18988	5.40699
Solyc04g078110.1.1	IPR010259		Subtilase family protein	-1.80274	1.97316	91.4367	1.1522e-21	1.26452e-19	2.56127	2.57119	0.674548	2.63804	0.717705	0.95437
Solyc05g053160.3.1	IPR008390	101245363	AWPM-19-like family protein	-6.52975	2.1245	91.3432	1.20792e-21	1.31992e-19	4.02095	2.33713	-2.85513	2.14342	-2.74938	-6.7078
Solyc01g111440.3.1	IPR009686	101263355	Senescence/dehydration-associated protein-related	1.10758	7.34772	91.1306	1.34494e-21	1.46332e-19	6.70419	6.59581	7.70353	6.76284	7.6842	7.98315
Solyc05g051240.1.1	IPR001969	101261332	Eukaryotic aspartyl protease family protein	1.02808	8.40925	91.0872	1.3748e-21	1.48939e-19	7.74353	7.69909	8.82291	7.95886	8.90177	8.77204
Solyc10g086570.3.1	IPR001305	778362		-2.06496	1.93362	91.0418	1.40666e-21	1.51093e-19	2.55163	2.85088	0.63526	2.3921	0.521895	0.487621
Solyc04g014680.3.1		101263804	Ubiquitin-specific protease family C19-related protein	1.14593	3.99096	90.8166	1.57629e-21	1.68596e-19	3.23244	3.31748	4.54182	3.34534	4.47047	4.31716
Solyc07g064410.1.1	IPR019547	101252202	fatty acid desaturase A	2.78566	0.812151	90.5772	1.779e-21	1.89475e-19	-1.17887	-0.835146	1.74594	-1.74347	1.46349	1.42631
Solyc08g066250.3.1	IPR002129		Pyridoxal phosphate (PLP)-dependent transferases superfamily protein	-1.79088	8.49774	90.4924	1.85692e-21	1.96943e-19	8.99158	9.51833	7.11384	8.78205	7.36545	7.51406
Solyc03g093560.1.1	IPR001471		Integrase-type DNA-binding superfamily protein	-1.09763	7.35395	90.4833	1.86544e-21	1.97019e-19	7.92752	7.78726	6.85528	7.67519	6.64519	6.5955
Solyc09g005610.3.1	IPR025422		transcription factor-related	-9.08152	0.432815	90.1417	2.21697e-21	2.3317e-19	2.17865	0.733307	-6.7078	0.677646	-6.7078	-6.7078
Solyc06g076750.3.1	IPR000109	101260946	peptide transporter 1	-1.00538	7.12646	89.7872	2.65208e-21	2.77775e-19	7.52586	7.55827	6.62084	7.54391	6.61222	6.36556
Solyc03g115230.3.1	IPR003593	101254583	heat shock protein 101	1.12629	9.31455	89.1476	3.66427e-21	3.80632e-19	8.69728	8.4971	9.60213	8.72677	9.75852	9.93124
Solyc05g007900.2.1			RING/U-box superfamily protein	1.28121	4.916	89.1555	3.64964e-21	3.80632e-19	4.35037	4.02539	5.5937	3.99833	5.34115	5.29336
Solyc09g090760.3.1	IPR004324		Major facilitator superfamily protein	1.07239	4.67968	88.9516	4.04596e-21	4.18558e-19	4.01044	3.93634	5.03427	4.16453	5.07695	5.222
Solyc02g032910.2.1				-1.52701	3.14691	88.8909	4.17189e-21	4.29824e-19	3.57444	3.87098	2.25373	3.67008	1.92652	2.34481
Solyc08g077330.3.1	IPR009009	101258887	expansin-like B1	1.30058	3.43536	88.1265	6.13998e-21	6.24941e-19	2.54193	2.48644	3.96113	2.83355	3.96294	3.87276
Solyc12g099500.2.1				1.19272	6.32144	87.7418	7.45813e-21	7.56056e-19	5.52516	5.46918	6.96581	5.79383	6.68426	6.72385
Solyc03g097430.1.1	IPR025520	104646508		-3.14016	1.13304	87.719	7.54459e-21	7.61762e-19	2.11466	1.96668	-0.278809	1.73727	-2.19569	-1.59541
Solyc08g068350.3.1		101260663		1.26456	3.39348	87.2635	9.49846e-21	9.55219e-19	2.58979	2.67057	4.01952	2.5869	3.83515	3.77831
Solyc06g050760.1.1	IPR032710	101265932	senescence associated gene 20	1.26655	7.76305	86.9466	1.1149e-20	1.11676e-18	6.91565	7.05669	8.53661	7.00773	8.12378	8.07771
Solyc11g005150.2.1	IPR032675		leucine-rich repeat/extensin 1	1.54953	3.69918	86.7971	1.20244e-20	1.19969e-18	2.49243	2.76354	3.9651	2.86251	4.31274	4.46443
Solyc05g007160.3.1	IPR009057	101260045	Duplicated homeodomain-like superfamily protein	1.3385	3.83223	86.6994	1.26336e-20	1.2555e-18	2.6898	3.1485	4.25156	3.13	4.40801	4.36043
Solyc07g064820.1.1	IPR000719		mitogen-activated protein kinase kinase kinase 15	1.31101	3.24514	86.5263	1.3789e-20	1.36494e-18	2.33285	2.44212	3.68631	2.51576	3.65962	3.87276
Solyc09g005570.3.1	IPR032795	101249483		1.52076	3.12649	86.4418	1.43909e-20	1.41897e-18	2.04769	2.11519	3.52371	2.29983	3.5863	3.89717
Solyc02g014670.2.1		101263358		-7.41506	0.609495	86.2835	1.55902e-20	1.53124e-18	2.36621	1.03131	-6.7078	0.709876	-4.4948	-6.7078
Solyc03g096040.3.1	IPR013766	101260517	1-cysteine peroxiredoxin 1	-6.14998	3.98972	86.2229	1.60754e-20	1.57277e-18	5.73976	4.34414	-2.46527	4.33178	-0.0238458	-2.71413
Solyc07g062130.3.1	IPR005888	101249663	rhamnose biosynthesis 1	1.19751	5.41866	86.1984	1.6276e-20	1.58625e-18	4.67937	4.53029	5.84791	4.85749	5.74554	6.0683
Solyc02g089010.2.1	IPR013320		chitin elicitor receptor kinase 1	1.76679	4.05954	86.0548	1.75015e-20	1.69913e-18	2.81588	3.04858	4.1885	2.86251	4.85735	4.88106
Solyc02g085910.3.1	IPR004883	101244335	LOB domain-containing protein 41	1.11577	6.19473	85.8354	1.95551e-20	1.88401e-18	5.53742	5.6383	6.82941	5.40587	6.54609	6.54343
Solyc01g057770.3.1	IPR003020		HCO3- transporter family	1.39444	5.11387	85.5883	2.21584e-20	2.1267e-18	4.02792	4.14426	5.56524	4.52757	5.51804	5.83102
Solyc05g013410.3.1	IPR001810	101265542	F-box family protein	1.97013	1.49919	85.3814	2.46021e-20	2.34342e-18	0.0979475	0.258518	2.10349	0.129126	2.05285	2.21768
Solyc08g068790.2.1	IPR000182		Acyl-CoA N-acyltransferases (NAT) superfamily protein	-1.05744	4.74937	85.3268	2.52908e-20	2.39996e-18	5.24635	5.07661	4.03846	5.21275	4.04123	4.2752
Solyc06g074670.3.1	IPR016040		UDP-D-apiose/UDP-D-xylose synthase 2	1.38077	5.22955	85.2094	2.68378e-20	2.53723e-18	4.24073	4.30756	5.57954	4.55887	5.61953	6.02702
Solyc08g079160.3.1	IPR001096		beta vacuolar processing enzyme	-6.05856	1.82959	84.9086	3.12476e-20	2.93216e-18	3.67991	2.31272	-3.391	1.62344	-2.44613	-4.4652
Solyc04g074490.3.1	IPR011009	101261810	transferases, transferring glycosyl groups	1.0892	6.16288	84.7584	3.37151e-20	3.15199e-18	5.45713	5.47606	6.46711	5.60965	6.53531	6.79191
Solyc09g008205.1.1	IPR029044		Nucleotide-diphospho-sugar transferases superfamily protein	-6.88077	1.98355	84.481	3.87918e-20	3.61322e-18	3.8507	2.49731	-6.7078	1.73727	-2.44613	-6.7078
Solyc04g072470.3.1	IPR003614		Scorpion toxin-like knottin superfamily protein	-6.96867	5.88332	84.2177	4.43186e-20	4.087e-18	7.67058	6.62459	0.466445	5.61605	0.374835	-2.71413
Solyc05g008220.3.1	IPR025322			-1.25099	4.39978	83.8696	5.285e-20	4.85105e-18	5.11023	4.80639	3.75207	4.72578	3.51785	3.64466
Solyc03g119320.1.1		101259728		-1.27851	3.33715	83.4751	6.4523e-20	5.90105e-18	3.9567	3.78043	2.65828	3.74975	2.40523	2.59551
Solyc07g042540.3.1				1.89221	2.79035	83.3284	6.9494e-20	6.33273e-18	1.76045	1.27817	3.12334	1.51817	3.37035	3.71303
Solyc07g062310.3.1	IPR006943		Plant protein of unknown function (DUF641)	2.173	1.42104	82.6826	9.63443e-20	8.74792e-18	-0.0703665	-0.453928	2.05965	0.176024	1.92652	2.25053
Solyc02g083310.3.1	IPR003729	101247280	Wound-responsive family protein	-1.05318	4.00493	82.3503	1.13987e-19	1.02759e-17	4.51806	4.37982	3.30331	4.39757	3.46883	3.3586
Solyc01g008220.3.1	IPR011993	101257001		2.59992	0.850475	81.9719	1.38034e-19	1.23994e-17	-0.83766	-1.70728	1.4158	-0.766764	1.48158	1.75104
Solyc04g081420.3.1				1.12049	4.93073	81.9509	1.39513e-19	1.24879e-17	4.18884	4.22495	5.16589	4.35998	5.43695	5.51344
Solyc04g074270.3.1	IPR001611	101256969	Outer arm dynein light chain 1 protein	1.0138	6.6488	81.7606	1.53608e-19	1.36527e-17	5.95238	5.97993	7.00342	6.21256	7.0217	7.17043
Solyc11g043110.2.1	IPR001087		GDSL-like Lipase/Acylhydrolase superfamily protein	-6.74055	-0.0151799	81.5878	1.67645e-19	1.48481e-17	1.52474	0.657807	-4.25303	0.176024	-6.7078	-6.7078
Solyc07g056510.3.1	IPR010987		glutathione S-transferase TAU 25	1.22351	7.5643	81.5418	1.71596e-19	1.51449e-17	6.87035	6.76614	7.95183	6.83904	7.82829	8.32119
Solyc03g116910.3.1	IPR016040	778359	cinnamoyl coa reductase 1	1.64861	2.50169	81.2784	1.96053e-19	1.71832e-17	1.62001	1.39902	3.00504	1.25973	3.25943	2.94902
Solyc08g006360.2.1	IPR002213		UDP-glucosyl transferase 74D1	-1.04204	3.8272	81.1197	2.1245e-19	1.8556e-17	4.24073	4.18517	3.19939	4.32139	3.18964	3.2382
Solyc04g015140.2.1				-1.37792	3.24462	80.9768	2.2838e-19	1.98785e-17	3.78232	3.91623	2.56728	3.59008	2.31734	2.28264
Solyc05g005280.3.1	IPR012317		similar to RCD one 2	2.75561	0.972096	80.0827	3.59056e-19	3.09327e-17	-1.31325	-1.20629	2.05965	-0.680684	1.49944	1.53696
Solyc07g052270.3.1	IPR002347	101249837	hydroxysteroid dehydrogenase 1	-8.46607	-0.152077	79.8183	4.10475e-19	3.52422e-17	1.37981	0.696051	-6.7078	-0.189651	-6.7078	-6.7078
Solyc02g090370.3.1	IPR003388		Reticulan like protein B13	-6.45583	1.85133	79.396	5.08297e-19	4.3493e-17	3.79054	1.88626	-2.85513	1.87155	-3.13381	-6.7078
Solyc04g049960.3.1	IPR000612	101250793	Low temperature and salt responsive protein family	-6.35451	0.842211	79.231	5.52552e-19	4.712e-17	2.62696	1.30316	-4.25303	0.802458	-3.65943	-6.7078
Solyc02g085590.3.1	IPR011051	101256744	RmlC-like cupins superfamily protein	-4.22689	4.05755	79.0767	5.97442e-19	5.07765e-17	5.83517	4.35613	1.24362	4.10215	0.717705	0.112059
Solyc02g062550.3.1	IPR003593	101244925	cytochrome BC1 synthesis	1.8398	3.2952	78.8612	6.66317e-19	5.64401e-17	1.67429	1.93505	3.73823	2.50661	3.89709	4.112
Solyc02g084840.3.1	IPR030513		dehydrin xero 1	-5.89291	5.2356	78.4704	8.12077e-19	6.85567e-17	7.16428	5.43849	0.750054	5.14806	0.747903	-1.31351
Solyc10g081720.2.1	IPR000782	101244241	FASCICLIN-like arabinogalactan protein 17 precursor	-1.13132	7.58594	78.2618	9.02497e-19	7.56838e-17	8.19705	7.81577	7.0116	8.08977	6.74822	6.9627
Solyc01g109890.3.1	IPR001623	101248245	DNAJ heat shock N-terminal domain-containing protein	1.15672	5.80762	77.9385	1.063e-18	8.85556e-17	5.11514	4.99076	6.10857	5.22534	6.17379	6.49799
Solyc01g108730.2.1	IPR029058		methyl esterase 1	-2.97754	0.690704	77.1551	1.58049e-18	1.30803e-16	1.21869	1.8528	-2.15867	1.28134	-1.22765	-1.31351
Solyc09g005080.1.1	IPR032675		receptor like protein 6	1.05358	4.65187	76.9113	1.78813e-18	1.47023e-16	3.87794	3.97961	4.98629	4.199	5.07397	5.17144
Solyc06g034040.1.1	IPR000136	101250895	oleosin 1	-7.04541	4.73877	76.6644	2.02627e-18	1.65525e-16	6.59411	5.15077	-0.615387	4.74535	-0.820715	-6.7078
Solyc06g053625.1.1	IPR017441		phosphoenolpyruvate carboxylase kinase 2	-1.25653	5.07995	76.5452	2.15229e-18	1.75252e-16	5.65569	5.47331	3.9651	5.58597	4.41038	4.51262
Solyc02g062100.3.1	IPR009686	101253155	Senescence/dehydration-associated protein-related	1.22201	4.13344	76.4801	2.2244e-18	1.80542e-16	3.15184	3.31134	4.60674	3.6536	4.57313	4.65437
Solyc08g061490.3.1		101265566		-1.34322	2.83925	76.3308	2.39917e-18	1.94102e-16	3.48616	3.29896	1.90306	3.2554	2.06489	2.04119
Solyc05g053350.3.1		101248580		-6.42645	2.19364	75.9282	2.94169e-18	2.34981e-16	3.99985	3.06328	-2.85513	1.4625	-2.44613	-6.7078
Solyc08g078210.3.1	IPR015797		nudix hydrolase homolog 8	-1.26129	3.00849	75.8247	3.10005e-18	2.4685e-16	3.52606	3.54405	2.05965	3.4203	2.31734	2.30366
Solyc11g068960.2.1	IPR011598	101248073	transcription factor-related	-1.31033	3.02172	75.782	3.16772e-18	2.51446e-16	3.53097	3.44647	1.98348	3.59008	2.36683	2.25053
Solyc05g049980.3.1	IPR011050		Pectin lyase-like superfamily protein	-1.16436	3.78719	75.7719	3.18393e-18	2.51939e-16	4.35592	4.27002	3.19939	4.11424	3.14494	2.90155
Solyc03g123460.3.1	IPR007650		Protein of unknown function (DUF581)	-1.20175	3.45177	75.6565	3.37562e-18	2.66273e-16	3.92347	3.84993	2.91768	3.99179	2.68822	2.55225
Solyc01g095080.3.1	IPR015421	606304	1-amino-cyclopropane-1-carboxylate synthase 2	1.09885	10.7042	75.2364	4.17604e-18	3.25345e-16	10.1165	9.80126	11.0625	10.2087	11.1162	11.2674
Solyc12g099900.1.1	IPR005202	101253266	scarecrow-like 3	-1.67782	2.41578	75.1479	4.3674e-18	3.39206e-16	3.1582	3.00354	1.5903	2.85532	1.3695	1.00658
Solyc06g048865.1.1				1.45578	2.65886	74.961	4.80098e-18	3.71737e-16	1.5636	1.59391	3.2128	1.99439	3.18964	3.17115
Solyc03g119740.3.1	IPR017884	101260117	Duplicated homeodomain-like superfamily protein	1.0354	4.82528	74.717	5.43262e-18	4.1808e-16	4.21044	4.22495	5.43831	4.20183	5.194	5.0921
Solyc01g009660.2.1			CAP160 protein	-6.6627	1.14796	74.4865	6.10546e-18	4.68432e-16	3.0113	0.769626	-4.25303	1.62344	-3.65943	-6.7078
Solyc10g017980.1.1	IPR001002		basic chitinase	-1.326	9.67016	74.4655	6.17075e-18	4.72006e-16	10.3713	10.2637	9.0746	9.87719	8.66883	8.80639
Solyc02g077970.3.1		104645830	Late embryogenesis abundant protein (LEA) family protein	-5.18475	2.93854	73.9248	8.11523e-18	6.17002e-16	4.89662	2.69909	-0.932039	3.05043	-1.22765	-1.76013
Solyc09g082330.2.1	IPR006045		cupin family protein	-8.51482	-0.1028	73.8973	8.22902e-18	6.23775e-16	1.58265	0.404242	-6.7078	-0.0753848	-6.7078	-6.7078
Solyc01g104320.3.1	IPR006843		Plastid-lipid associated protein PAP / fibrillin family protein	-1.0997	4.45558	73.5074	1.00259e-17	7.57705e-16	4.84825	5.03619	3.5817	4.80811	3.93696	3.85151
Solyc06g060840.1.1	IPR000136	101249653	oleosin3	-1.86367	8.35018	73.2176	1.16114e-17	8.74909e-16	9.20559	9.07521	7.58352	8.66543	6.92548	6.7647
Solyc07g005820.3.1	IPR029048		heat shock protein 70B	-5.84449	3.50213	73.0464	1.2664e-17	9.4856e-16	5.35973	3.75349	-0.713414	3.60301	-0.9122	-4.4652
Solyc03g093540.1.1	IPR016177	101267005	Integrase-type DNA-binding superfamily protein	-1.26359	3.90108	73.0332	1.27486e-17	9.52068e-16	4.57624	4.13037	3.13747	4.43661	3.00191	3.24365
Solyc01g098520.3.1			MUTL protein homolog 3	2.41917	1.37442	72.8584	1.39293e-17	1.03718e-15	-0.0703665	-0.729991	1.67022	-0.313751	2.37653	2.06601
Solyc02g070000.3.1	IPR001611		Leucine-rich receptor-like protein kinase family protein	-1.54287	2.12976	72.746	1.47455e-17	1.09473e-15	2.75841	2.57119	1.26951	2.71945	1.09193	1.08152
Solyc01g099920.3.1	IPR009489		PAR1 protein	-1.56931	5.64922	72.6347	1.5601e-17	1.15484e-15	6.58469	6.19466	4.81446	5.80413	4.63099	4.52162
Solyc02g063350.1.1	IPR011992	101252553	calmodulin like 23	1.80008	2.41294	72.3455	1.80636e-17	1.32163e-15	1.31295	1.22685	3.32816	1.14654	2.7114	2.9885
Solyc02g091250.1.1		104645999		1.30819	4.77807	72.2635	1.88298e-17	1.37371e-15	3.67104	4.03661	5.24632	4.17322	5.09321	5.48497
Solyc10g075150.2.1	IPR000528		lipid transfer protein 12	-2.10586	4.7608	72.1567	1.98771e-17	1.44177e-15	5.8212	5.63338	3.44069	4.68987	3.35572	3.25987
Solyc01g087460.2.1	IPR015655		Protein phosphatase 2C family protein	-8.73822	0.103029	72.0682	2.07887e-17	1.49928e-15	1.87304	0.618522	-6.7078	-0.0753848	-6.7078	-6.7078
Solyc08g005725.1.1	IPR001128		cytochrome P450, family 71, subfamily B, polypeptide 34	1.44433	2.48126	71.8093	2.37032e-17	1.7046e-15	1.5443	1.37565	3.03553	1.73727	3.0752	2.90843
Solyc07g066400.1.1		101257489		-6.97624	0.199835	71.5509	2.70192e-17	1.93755e-15	1.9484	0.308746	-6.7078	0.504722	-4.4948	-6.7078
Solyc02g068620.1.1				-5.04637	4.26807	71.3407	3.00564e-17	2.14924e-15	6.17892	4.73012	0.169188	3.7263	-0.576642	0.692759
Solyc10g086180.2.1	IPR024083	101243656	PHE ammonia lyase 1	-1.22792	6.7808	71.2901	3.08372e-17	2.19885e-15	7.3831	7.04192	6.21483	7.35207	5.7558	6.10991
Solyc11g012130.2.1	IPR003245	101253552	Cupredoxin superfamily protein	-1.46954	3.53498	71.2001	3.22764e-17	2.28213e-15	3.97844	4.22495	2.88456	4.04012	2.69599	2.19536
Solyc07g063770.3.1	IPR001480	104648558	S-locus lectin protein kinase family protein	1.73997	1.6912	71.1253	3.35247e-17	2.35719e-15	0.295591	0.44972	2.25373	0.802458	2.25562	2.31406
Solyc00g174340.2.1	IPR014044		basic pathogenesis-related protein 1	-2.8454	2.21657	71.1306	3.34344e-17	2.35719e-15	3.05968	3.50688	0.223182	2.2459	-0.185662	0.450405
Solyc01g079660.2.1	IPR008480	101247750		1.24694	6.04418	70.6415	4.28412e-17	2.99556e-15	5.07535	5.25372	6.60122	5.50219	6.27252	6.69829
Solyc02g089515.1.1				1.72987	3.39434	70.5749	4.43108e-17	3.08976e-15	2.16607	2.7178	3.8454	1.7985	4.05941	4.0819
Solyc12g010540.1.1	IPR016040	101251855	UDP-D-glucuronate 4-epimerase 1	1.1967	5.99616	70.4494	4.72225e-17	3.28372e-15	5.0482	5.16448	6.42525	5.55969	6.39207	6.59016
Solyc10g017970.1.1	IPR018371		basic chitinase	-1.27996	11.2516	70.2938	5.10977e-17	3.53404e-15	11.9523	11.7668	10.6933	11.5088	10.2122	10.4768
Solyc02g085150.3.1	IPR017884		RAD-like 6	-5.84642	1.23415	70.2936	5.11023e-17	3.53404e-15	3.0999	1.63386	-4.25303	0.997847	-2.74938	-4.4652
Solyc08g077060.3.1	IPR005735	101265355	lsd one like 1	1.26403	3.15366	69.6179	7.19817e-17	4.95085e-15	2.33285	2.60173	3.68631	2.16683	3.67148	3.55107
Solyc02g063520.3.1	IPR003106		Homeobox-leucine zipper protein family	1.12452	3.99137	69.5817	7.33151e-17	5.02886e-15	3.39212	3.04117	4.52042	3.4682	4.38177	4.41458
Solyc07g051840.3.1			WRKY DNA-binding protein 31	-1.05955	4.11283	69.017	9.76159e-17	6.63286e-15	4.54015	4.40601	3.31579	4.66953	3.59463	3.51998
Solyc11g012870.2.1	IPR018392	101245017	lysm domain GPI-anchored protein 1 precursor	-1.06735	4.17777	69.0143	9.77508e-17	6.63286e-15	4.45486	4.76202	3.67667	4.6003	3.52222	3.42725
Solyc07g054830.3.1	IPR001206		diacylglycerol kinase 5	1.05542	5.04856	68.9885	9.90413e-17	6.69683e-15	4.21655	4.44864	5.34398	4.57864	5.46335	5.61258
Solyc07g055910.3.1				1.83926	1.60618	68.9782	9.95554e-17	6.70128e-15	0.149954	0.206478	2.04473	0.677646	2.2661	2.29319
Solyc11g056680.1.1	IPR032675		Leucine-rich repeat (LRR) family protein	1.00613	6.28661	68.8602	1.05695e-16	7.09562e-15	5.55802	5.78523	6.8896	5.73534	6.57375	6.62398
Solyc02g080520.3.1				-1.69783	1.84744	68.8001	1.08966e-16	7.2958e-15	2.2987	2.45333	0.420964	2.55177	0.806468	0.927537
Solyc01g067650.2.1		101265958		-6.24883	0.250571	68.5727	1.22283e-16	8.16575e-15	1.96301	0.769626	-6.7078	0.221446	-3.65943	-6.7078
Solyc04g064530.1.1				-1.10186	3.29569	68.2212	1.46142e-16	9.73332e-15	3.68873	3.73982	2.76224	3.77662	2.64073	2.49857
Solyc03g006490.3.1	IPR029055	544312	Aluminium induced protein with YGL and LRDR motifs	-1.08577	5.21078	67.6739	1.92902e-16	1.27134e-14	5.63645	5.65296	4.84277	5.66516	4.40091	4.41699
Solyc01g091060.1.1	IPR000070		Plant invertase/pectin methylesterase inhibitor superfamily	-4.55008	1.06718	67.6631	1.93959e-16	1.27498e-14	2.79153	1.06092	-2.46527	1.4625	-2.44613	-2.71413
Solyc03g025810.3.1	IPR012418		CAP160 protein	-3.15995	2.2047	67.1458	2.52157e-16	1.64469e-14	3.71486	2.32498	-0.615387	2.69551	0.167044	-0.0385254
Solyc05g009820.3.1	IPR002495		galacturonosyltransferase-like 4	1.56417	2.01556	66.6944	3.17034e-16	2.05194e-14	1.11784	0.970203	2.70647	0.917326	2.42406	2.561
Solyc01g108220.3.1				2.65351	1.93524	66.4155	3.65222e-16	2.34578e-14	-0.330506	-0.0227691	2.04473	0.349714	2.59992	3.16542
Solyc12g098615.1.1	IPR027214		PHYTOCYSTATIN 2	-6.76098	0.0109081	66.1815	4.11254e-16	2.63474e-14	1.74362	0.206478	-4.25303	0.221446	-6.7078	-6.7078
Solyc01g007940.3.1	IPR015422		alanine-2-oxoglutarate aminotransferase 2	-6.17679	1.03139	65.7855	5.02771e-16	3.20478e-14	2.94661	1.17363	-4.25303	0.917326	-3.13381	-6.7078
Solyc06g065050.2.1	IPR025423	101255207	late embryogenesis abundant domain-containing protein / LEA domain-containing protein	-4.89382	1.59798	65.7286	5.17488e-16	3.29029e-14	3.41886	2.08669	-1.69096	1.30263	-2.74938	-2.71413
Solyc06g009890.2.1				1.43445	2.73914	65.7172	5.20489e-16	3.30105e-14	1.88843	2.05761	3.30331	1.51817	3.12207	3.36361
Solyc09g092110.3.1	IPR009856	101268227	CCR-like	-1.59848	2.69237	65.7087	5.22742e-16	3.30703e-14	3.0113	3.54405	1.80024	3.21105	1.77345	1.42631
Solyc01g098770.1.1	IPR032799	101262571	Eukaryotic aspartyl protease family protein	-5.62898	1.85507	65.6115	5.4918e-16	3.4656e-14	3.78643	1.61402	-2.85513	2.05837	-1.98235	-4.4652
Solyc02g084330.3.1				1.95715	1.63308	65.5235	5.74242e-16	3.60572e-14	-0.194581	0.657807	2.20089	0.349714	2.46099	2.0904
Solyc07g064170.3.1	IPR006501		methylesterase PCR A	1.01413	11.483	65.3129	6.39001e-16	4.0024e-14	10.7571	10.7431	11.828	11.1308	11.9206	11.9563
Solyc11g066330.1.1	IPR020846	101260898	Major facilitator superfamily protein	-1.1026	3.39945	64.7771	8.38696e-16	5.21437e-14	3.78643	3.87931	2.86771	3.85437	2.80772	2.52566
Solyc06g061110.2.1	IPR005513	101243796	Late embryogenesis abundant protein, group 1 protein	-5.60677	1.56036	64.6385	8.99797e-16	5.58051e-14	3.44512	1.83577	-2.85513	1.42417	-2.19569	-6.7078
Solyc03g114800.1.1	IPR027417	101261603	sulfotransferase 2A	1.50728	2.41595	64.5844	9.24862e-16	5.7219e-14	1.60145	1.17363	3.12334	1.53625	2.77876	2.9623
Solyc04g050750.1.1	IPR001471	101260337	Integrase-type DNA-binding superfamily protein	-8.26394	-0.330562	64.4753	9.77503e-16	6.03279e-14	1.37981	-0.0227691	-6.7078	-0.250367	-6.7078	-6.7078
Solyc02g077430.3.1	IPR002921		alpha/beta-Hydrolases superfamily protein	-5.58402	-1.03997	64.4441	9.93116e-16	6.1142e-14	-0.561911	0.0380471	-6.7078	-0.313751	-6.7078	-4.4652
Solyc10g017540.3.1	IPR005516		Remorin family protein	-8.47229	-0.135485	64.2757	1.08174e-15	6.64363e-14	1.65642	-0.152679	-6.7078	0.0806514	-6.7078	-6.7078
Solyc12g008800.2.1	IPR017930	101267581	myb-like transcription factor family protein	-2.36459	0.572057	64.0168	1.23365e-15	7.55818e-14	1.4644	1.22685	-1.69096	1.07411	-1.00988	-0.7837
Solyc06g073830.1.1	IPR002048		calmodulin-like 38	1.59329	3.14679	63.8238	1.36059e-15	8.31575e-14	2.04769	1.88626	3.89198	2.3921	3.34588	3.86571
Solyc03g083960.3.1	IPR006379		Haloacid dehalogenase-like hydrolase (HAD) superfamily protein	2.21855	1.29907	63.7745	1.39509e-15	8.50599e-14	-0.260943	-0.453928	1.63081	-0.0753848	1.84505	2.31406
Solyc09g005060.2.1	IPR005247		PEBP (phosphatidylethanolamine-binding protein) family protein	-6.76355	0.764346	63.5553	1.5593e-15	9.48432e-14	2.61776	0.096403	-4.25303	1.34429	-4.4948	-6.7078
Solyc09g005560.3.1	IPR027775		Homeodomain-like superfamily protein	1.06616	4.68817	63.4854	1.61563e-15	9.77978e-14	4.03485	4.15803	5.1503	3.96533	4.87456	5.30383
Solyc02g086310.1.1	IPR033872		Bifunctional inhibitor/lipid-transfer protein/seed storage 2S albumin superfamily protein	-3.78713	3.97275	63.4676	1.63024e-15	9.8446e-14	5.4865	5.02872	1.48373	3.39079	1.16088	0.450405
Solyc09g065470.3.1	IPR014710		cupin family protein	-6.8619	5.85632	63.4235	1.66717e-15	1.00436e-13	7.70684	6.16854	0.750054	5.99359	0.295273	-3.62629
Solyc01g018020.2.1	IPR009014	101251315	Transketolase	-4.91689	0.158831	63.3749	1.70884e-15	1.02701e-13	1.76045	0.357284	-2.85513	0.576397	-4.4948	-4.4652
Solyc04g055030.2.1	IPR017900	101252979	succinate dehydrogenase 2-3	-9.08771	0.434907	63.2419	1.82817e-15	1.09612e-13	2.42015	0.536588	-6.7078	0.0304913	-6.7078	-6.7078
Solyc01g087020.2.1				1.22115	6.25578	63.222	1.8467e-15	1.10461e-13	5.52147	5.48974	7.0583	5.54301	6.6651	6.42432
Solyc01g102610.3.1	IPR013130	101246763	ferric reduction oxidase 7	1.36455	2.37911	63.1405	1.92471e-15	1.14855e-13	1.42273	1.59391	2.77133	1.53625	2.84312	3.01423
Solyc07g055470.3.1	IPR001128		cytochrome P450, family 72, subfamily A, polypeptide 15	-1.90147	1.37074	62.2441	3.03417e-15	1.78945e-13	1.97747	2.15692	0.325459	1.85723	0.295273	-0.397051
Solyc02g077980.2.1				-4.89032	1.6032	62.0072	3.42207e-15	2.00883e-13	3.42942	2.01286	-1.5039	1.40461	-2.44613	-3.62629
Solyc05g013207.1.1	IPR016039	101262214	3-ketoacyl-CoA synthase 11	1.37068	2.45096	61.8742	3.66107e-15	2.14415e-13	1.5443	1.59391	3.12334	1.62344	2.95738	2.77932
Solyc10g086520.2.1	IPR007117		Barwin-like endoglucanases superfamily protein	1.19993	3.06585	61.8395	3.72615e-15	2.17721e-13	2.07485	2.37298	3.59711	2.50661	3.46883	3.52446
Solyc10g079870.2.1	IPR016164	100874536	cytokinin oxidase/dehydrogenase 1	1.06312	3.32248	61.6754	4.05004e-15	2.35556e-13	2.85558	2.59162	3.79281	2.5869	3.72939	3.71695
Solyc01g102490.3.1	IPR016040		Pyridine nucleotide-disulphide oxidoreductase family protein	1.04529	4.87249	61.6697	4.06178e-15	2.35695e-13	4.25564	4.35912	5.03992	4.13812	5.45537	5.3626
Solyc07g052550.2.1	IPR019794		Peroxidase superfamily protein	1.60593	2.33362	61.5925	4.22435e-15	2.44567e-13	1.42273	1.08993	2.94203	1.34429	2.59992	3.1128
Solyc06g068690.3.1	IPR000120		Amidase family protein	-6.08801	0.112365	61.5529	4.31014e-15	2.48962e-13	1.82586	0.733307	-4.25303	-0.131387	-6.7078	-4.4652
Solyc01g088390.3.1	IPR019128	101267349	zinc ion binding	1.41134	3.16203	61.4027	4.65174e-15	2.67469e-13	2.23992	2.27532	3.41772	2.31038	3.57371	3.99734
Solyc06g005770.1.1	IPR000528	101256678	Bifunctional inhibitor/lipid-transfer protein/seed storage 2S albumin superfamily protein	-7.95731	-0.623305	61.2955	4.91195e-15	2.8179e-13	0.549024	0.696051	-6.7078	-0.956059	-6.7078	-6.7078
Solyc04g082140.3.1	IPR008972	778302	SKU5 similar 5	1.49416	2.10554	61.2784	4.95484e-15	2.83606e-13	1.28996	1.08993	2.64845	1.04914	2.77876	2.47096
Solyc03g058330.3.1		101249614	Late Embryogenesis Abundant 4-5	-5.63499	0.802386	61.0517	5.55955e-15	3.17498e-13	2.6898	0.83963	-4.25303	0.802458	-3.13381	-4.4652
Solyc07g052480.3.1	IPR015813		isocitrate lyase	-2.49655	5.41413	60.8924	6.02815e-15	3.42689e-13	6.8533	5.76626	4.03469	5.55969	3.50464	3.43203
Solyc02g071580.3.1	IPR000209		subtilase family protein	-1.86835	1.22834	60.4858	7.4113e-15	4.18514e-13	1.70937	1.90271	0.275227	1.91367	0.0747541	-0.466532
Solyc03g115370.3.1	IPR002219	101256961	diacylglycerol kinase1	1.06899	6.42409	60.4338	7.60958e-15	4.28752e-13	5.73976	5.79298	6.55657	5.83916	6.88698	7.08688
Solyc12g056930.2.1	IPR001902	543686	sulfate transporter 1;3	-2.08782	0.604554	60.0564	9.21756e-15	5.14756e-13	1.26659	1.25274	-0.437305	1.21552	-1.00988	-1.07779
Solyc04g082050.3.1	IPR001251		SEC14 cytosolic factor family protein / phosphoglyceride transfer family protein	-1.25515	4.81602	60.032	9.33273e-15	5.20037e-13	5.31202	5.43849	4.38782	5.16414	3.96936	3.73641
Solyc05g053640.1.1				-6.86277	2.91182	59.7983	1.05092e-14	5.843e-13	4.9174	3.24839	-4.25303	2.32085	-6.7078	-1.59541
Solyc11g007560.2.1	IPR016084	104644459	Haem oxygenase-like, multi-helical	-5.63936	0.543528	59.7391	1.08304e-14	6.00835e-13	2.37716	0.357284	-3.391	0.832043	-4.4948	-4.4652
Solyc05g007480.1.1		101264929	phytochrome kinase substrate 1	1.28489	2.50533	59.6914	1.10961e-14	6.12884e-13	1.58265	1.61402	3.0654	1.88572	2.9247	2.97546
Solyc06g009270.3.1	IPR000756	101262422	diacylglycerol kinase 7	1.05636	3.19641	59.643	1.13721e-14	6.26757e-13	2.48233	2.5081	3.59711	2.67932	3.55248	3.69723
Solyc02g091710.3.1	IPR002035	101250463	Zinc finger (C3HC4-type RING finger) family protein	-3.09262	-0.0403099	59.552	1.19107e-14	6.5501e-13	0.764518	0.618522	-2.85513	0.741401	-1.35025	-4.4652
Solyc10g076300.2.1	IPR006702	101244045	Uncharacterised protein family (UPF0497)	-1.08307	3.2117	59.0338	1.54987e-14	8.46795e-13	3.7782	3.55969	2.43625	3.59008	2.58327	2.65397
Solyc07g045440.1.1	IPR000782	101260248	FASCICLIN-like arabinogalactan 2	1.23519	2.64191	58.696	1.84011e-14	1.0032e-12	1.74362	1.8011	3.14448	2.05837	3.15625	3.03323
Solyc03g111140.3.1	IPR006252	101267103	malate synthase	-5.23649	3.86289	58.5578	1.9741e-14	1.07162e-12	5.9321	3.84142	-1.05518	3.26085	0.121637	-0.539529
Solyc11g042800.2.1			embryonic cell protein 63	-4.97313	0.200266	58.0837	2.51202e-14	1.35778e-12	1.90366	0.357284	-3.391	0.429299	-3.65943	-4.4652
Solyc12g009050.2.1	IPR018362		nuclear factor Y, subunit A3	-2.75969	-0.147651	57.5668	3.26697e-14	1.76207e-12	0.696202	0.578137	-2.85513	0.390055	-2.44613	-1.59541
Solyc08g074960.3.1	IPR020846	101262446	Major facilitator superfamily protein	-2.15892	0.917724	57.5279	3.33214e-14	1.79339e-12	1.33559	1.51052	-0.278809	1.84277	-0.434214	-1.07779
Solyc06g076310.1.1				1.70001	3.04133	57.3563	3.636e-14	1.94862e-12	2.45157	1.4889	3.68631	1.68958	3.49577	3.72477
Solyc06g076020.3.1	IPR018181	100736433	heat shock cognate protein 70-1	1.05994	7.76032	57.052	4.24439e-14	2.26985e-12	6.99288	7.06493	8.10909	7.32404	8.0065	8.43273
Solyc07g009380.3.1	IPR000757	543619	xyloglucan endotransglucosylase/hydrolase 25	1.06973	7.68246	56.9962	4.36647e-14	2.32528e-12	6.9509	7.07495	8.41338	7.11918	7.98428	7.90965
Solyc06g069355.1.1				-7.78608	0.951266	56.9331	4.50903e-14	2.39615e-12	2.83983	1.81854	-6.7078	-0.44954	-6.7078	-4.4652
Solyc02g063220.3.1	IPR016305	101256451	Mannose-6-phosphate isomerase, type I	1.33527	3.17396	56.5688	5.42659e-14	2.87166e-12	2.61776	1.88626	3.6815	2.42159	3.60292	3.74796
Solyc07g042090.3.1	IPR005178		Protein of unknown function (DUF300)	-7.87976	-0.672414	56.4016	5.90826e-14	3.11743e-12	0.980972	-0.54021	-6.7078	-0.44954	-6.7078	-6.7078
Solyc02g092110.3.1	IPR009438	101268443	phytosulfokine 4 precursor	1.01054	3.53726	56.2428	6.40519e-14	3.36833e-12	2.87888	2.97272	4.11543	2.95281	3.81746	3.89371
Solyc10g086390.2.1	IPR016040	101263363	NAD(P)-binding Rossmann-fold superfamily protein	-4.04134	-0.221622	56.2144	6.4985e-14	3.41029e-12	1.09149	0.206478	-6.7078	0.308213	-2.19569	-4.4652
Solyc10g007800.3.1		101250930	protodermal factor 1	-6.67767	0.667745	56.109	6.85615e-14	3.59052e-12	2.56127	-0.222301	-6.7078	1.21552	-4.4948	-4.4652
Solyc07g062500.3.1	IPR001128		cytochrome P450, family 72, subfamily A, polypeptide 15	-1.03527	2.97809	55.2823	1.04404e-13	5.43373e-12	3.38671	3.46873	2.30471	3.32987	2.41468	2.35491
Solyc01g088010.1.1	IPR029068		Lactoylglutathione lyase / glyoxalase I family protein	-4.0479	0.694598	55.0635	1.16701e-13	6.06123e-12	2.32155	1.35189	-2.46527	0.467504	-2.44613	-2.41043
Solyc02g085360.3.1	IPR001128		Cytochrome P450 superfamily protein	1.0024	4.26013	54.8806	1.2808e-13	6.61144e-12	3.67104	3.44085	4.54182	3.85437	4.65509	4.79832
Solyc06g065630.3.1	IPR020946	100037507	Flavin-binding monooxygenase family protein	-2.15631	0.559831	54.6049	1.4737e-13	7.54548e-12	1.4644	1.00108	-0.713414	1.1228	-1.22765	-0.875227
Solyc08g078160.3.1	IPR000136	101268303	oleosin 1	-2.8518	2.95527	54.6088	1.47076e-13	7.54548e-12	4.53038	3.24839	1.13514	3.01862	0.994533	0.559291
Solyc12g010820.2.1		101252059	late embryogenesis abundant domain-containing protein / LEA domain-containing protein	-3.48354	2.82213	54.5402	1.52304e-13	7.7823e-12	4.49059	3.24839	0.0547338	2.77382	0.806468	-0.539529
Solyc09g014750.1.1	IPR000389	101247056	Stress induced protein	-3.34497	4.78737	53.9685	2.03735e-13	1.03892e-11	6.52501	5.04177	2.80712	4.68583	2.00363	1.9508
Solyc06g035940.3.1	IPR009057		Homeobox-leucine zipper family protein / lipid-binding START domain-containing protein	-1.36122	3.00302	53.8865	2.12415e-13	1.081e-11	3.3371	3.3236	2.14604	3.82892	2.28681	2.02862
Solyc07g065970.1.1	IPR001623		Chaperone DnaJ-domain superfamily protein	1.38749	2.64484	53.1665	3.06446e-13	1.54706e-11	1.93364	1.91897	3.36465	1.42417	3.05722	3.03951
Solyc02g086920.2.1	IPR004316	101251355	Nodulin MtN3 family protein	-1.18473	2.69439	52.5883	4.11335e-13	2.05602e-11	3.27405	3.0994	2.14604	3.0877	1.77345	1.99024
Solyc02g077530.2.1	IPR016461		O-methyltransferase family protein	-6.80901	0.0387564	52.5908	4.10812e-13	2.05602e-11	1.9484	0.0380471	-6.7078	-0.131387	-4.4948	-6.7078
Solyc02g064680.3.1	IPR008250	101246688	calcium ATPase 2	1.06018	7.55076	52.5738	4.14379e-13	2.06715e-11	6.65892	6.83309	7.87697	7.22263	7.99907	8.07179
Solyc05g016600.1.1				-5.94439	-0.0341817	52.2794	4.81393e-13	2.37331e-11	1.74362	0.404242	-6.7078	-0.313751	-3.65943	-6.7078
Solyc06g062430.3.1	IPR007828		myo-inositol oxygenase 1	-1.47443	2.1407	52.004	5.5387e-13	2.72e-11	2.89421	2.72707	1.26951	2.38213	1.11528	1.24258
Solyc05g013530.3.1	IPR000270		Octicosapeptide/Phox/Bem1p family protein	-1.05194	5.95665	51.2696	8.05134e-13	3.94625e-11	6.53115	6.41057	5.60645	6.20269	5.24914	5.10862
Solyc09g092480.1.1	IPR002213		UDP-glucosyl transferase 75B2	-1.17098	2.53702	51.2029	8.3294e-13	4.06626e-11	2.96124	3.0994	1.80024	2.91875	1.96559	1.68848
Solyc06g066600.3.1	IPR020846	101250024	Major facilitator superfamily protein	1.05984	5.8703	51.1762	8.44381e-13	4.10672e-11	5.05504	5.16448	6.04815	5.47431	6.34963	6.47616
Solyc12g096080.2.1	IPR002213		UDP-Glycosyltransferase superfamily protein	-4.43307	0.57897	51.0968	8.79207e-13	4.26788e-11	2.27547	0.536588	-6.7078	0.971503	-2.19569	-2.71413
Solyc03g116225.1.1	IPR001002		basic chitinase	-1.5053	4.77211	50.7073	1.0722e-12	5.13556e-11	5.44025	5.47194	4.30261	5.0586	3.55675	3.49278
Solyc03g119820.1.1	IPR000136	101258143	Oleosin family protein	-4.47895	-0.845846	50.7087	1.07145e-12	5.13556e-11	0.427865	-0.54021	-4.25303	-0.313751	-3.65943	-6.7078
Solyc07g043420.3.1	IPR026992	544002	2-oxoglutarate (2OG) and Fe(II)-dependent oxygenase superfamily protein	-1.2777	2.83447	50.5933	1.1363e-12	5.4323e-11	3.48109	3.31134	2.15995	3.17109	2.23445	1.70438
Solyc09g098290.3.1	IPR011009	101259486	Leucine-rich receptor-like protein kinase family protein	-1.82632	1.01664	50.5413	1.1668e-12	5.56757e-11	1.35787	1.71059	-0.355881	1.75282	0.0747541	-0.397051
Solyc06g083600.2.1	IPR003340	101244009	AP2/B3-like transcriptional factor family protein	-5.8838	-0.781377	50.1372	1.43364e-12	6.73889e-11	0.730764	-0.835146	-6.7078	-0.250367	-4.4948	-6.7078
Solyc02g092215.1.1	IPR008630		Galactosyl transferase GMA12/MNN10 family protein	-2.80896	2.01015	50.0907	1.46801e-12	6.88764e-11	3.54561	2.30036	0.169188	2.11963	0.121637	-0.330763
Solyc07g065985.1.1	IPR000136		glycine-rich protein / oleosin	-3.63041	1.7309	50.0518	1.49741e-12	7.01254e-11	3.45549	1.99763	-1.05518	1.70565	-0.503671	-1.76013
Solyc11g072480.2.1	IPR018499	101249329	tetraspanin3	-1.10016	3.79263	50.0432	1.50398e-12	7.03026e-11	4.07576	4.41177	3.40609	4.199	3.02059	2.94902
Solyc05g012790.3.1	IPR001594	101254385	DHHC-type zinc finger family protein	-1.97227	1.00518	50.0244	1.51845e-12	7.08477e-11	1.40143	1.98224	-0.136014	1.4813	-0.243902	-0.616418
Solyc04g079190.3.1	IPR029058	101259332	alpha/beta-Hydrolases superfamily protein	1.05723	3.27043	49.6835	1.80659e-12	8.37984e-11	2.73306	2.66093	3.86676	2.50661	3.50906	3.68527
Solyc04g078300.3.1	IPR002100		AGAMOUS-like 104	-6.01497	-0.672734	49.6483	1.83928e-12	8.50312e-11	0.951968	-0.54021	-6.7078	-0.44954	-4.4948	-6.7078
Solyc06g065530.3.1	IPR001087	101246731	GDSL-like Lipase/Acylhydrolase superfamily protein	-5.41923	1.21059	49.4661	2.01831e-12	9.31375e-11	2.90181	2.26264	-3.391	0.265482	-6.7078	-2.15967
Solyc03g044600.2.1				-2.15803	0.381055	49.0314	2.51894e-12	1.15606e-10	0.730764	1.30316	-0.932039	0.997847	-1.11466	-1.31351
Solyc02g077470.3.1	IPR010754		Optic atrophy 3 protein (OPA3)	1.06648	3.25441	48.7488	2.90938e-12	1.328e-10	2.47215	2.46445	3.62746	2.85532	3.61116	3.78953
Solyc03g007710.3.1		101258132		1.98677	0.507817	48.738	2.92537e-12	1.3313e-10	-0.403593	-1.20629	1.04807	-1.174	1.18316	1.05697
Solyc06g006110.3.1	IPR004798	101265339	cation exchanger 3	-7.17204	-1.28698	48.7368	2.92715e-12	1.3313e-10	-0.0703665	-0.372517	-6.7078	-1.43082	-6.7078	-6.7078
Solyc06g066290.3.1		101257272		-2.03709	0.213692	48.6221	3.10355e-12	1.40899e-10	0.861286	0.83963	-0.932039	0.772252	-1.22765	-1.44759
Solyc03g122360.3.1	IPR001128		Cytochrome P450 superfamily protein	1.24683	3.87344	48.4758	3.34391e-12	1.50728e-10	3.09328	2.65123	4.29002	3.46348	4.41509	4.36294
Solyc06g076300.3.1	IPR006439		Haloacid dehalogenase-like hydrolase (HAD) superfamily protein	1.03408	3.29064	48.4368	3.41104e-12	1.53205e-10	2.65423	2.67057	3.59199	2.68744	3.57371	3.91777
Solyc01g090350.3.1	IPR016140	101258994	Bifunctional inhibitor/lipid-transfer protein/seed storage 2S albumin superfamily protein	-5.23104	5.58135	48.4397	3.40606e-12	1.53205e-10	7.32242	5.95452	2.01443	5.85004	1.63488	-1.59541
Solyc11g010520.1.1	IPR010800	101244731		-3.59647	3.06517	47.8945	4.49774e-12	1.9988e-10	4.74847	2.51881	0.712795	3.74975	0.590161	-0.539529
Solyc09g082110.3.1	IPR007011		Seed maturation protein	-2.60076	2.8659	47.5894	5.25516e-12	2.31502e-10	4.4129	3.12766	1.21726	2.87678	0.994533	0.900196
Solyc09g075730.3.1	IPR001611	101259075	Leucine-rich repeat (LRR) family protein	1.028	3.0368	47.4117	5.75382e-12	2.51712e-10	2.44117	2.24984	3.40609	2.54285	3.35081	3.57288
Solyc01g087180.3.1		101246280	Expressed protein	-2.14515	3.16886	47.337	5.97731e-12	2.60137e-10	4.46772	3.59047	2.11782	3.27707	1.56875	1.40701
Solyc12g005420.2.1	IPR000315	101253977	light-regulated zinc finger protein 1	-7.82069	-0.731098	46.8333	7.72909e-12	3.34644e-10	1.03729	-0.453928	-6.7078	-1.06092	-6.7078	-6.7078
Solyc10g080210.2.1	IPR012334	544051	Pectin lyase-like superfamily protein	-1.12919	11.8823	46.6841	8.34009e-12	3.5925e-10	12.4202	12.0461	11.0356	12.5102	11.0285	11.5109
Solyc08g062180.2.1				1.51271	1.48884	46.5187	9.07494e-12	3.89574e-10	0.427865	0.44972	1.74594	0.610942	2.06489	2.17269
Solyc01g006150.3.1	IPR027470	101253924	Cation efflux family protein	-1.03884	4.34044	46.5037	9.14449e-12	3.91893e-10	4.8909	4.78881	4.02712	4.6003	3.53527	3.57288
Solyc05g009240.3.1	IPR006927	101244872	Plant protein of unknown function (DUF639)	-1.83396	2.09566	46.0342	1.16209e-11	4.92171e-10	3.17712	2.53999	0.594872	2.31038	1.11528	0.900196
Solyc02g064800.3.1	IPR001680	101268835	transducin family protein / WD-40 repeat family protein	-1.47023	2.30723	45.9269	1.22747e-11	5.18994e-10	2.80781	2.98049	0.821803	2.75077	1.42663	1.7201
Solyc12g041870.2.1	IPR008146		glutamine synthetase 1;4	-8.22346	-0.366277	45.7632	1.3345e-11	5.62361e-10	1.60145	-0.631982	-6.7078	-0.680684	-6.7078	-6.7078
Solyc10g007660.3.1	IPR006459	101263854	Uncharacterised protein family (UPF0497)	-6.75346	0.00404162	45.518	1.51246e-11	6.33128e-10	1.97747	0.096403	-4.25303	-0.599451	-6.7078	-6.7078
Solyc04g072890.3.1			Transducin/WD40 repeat-like superfamily protein	-1.29251	5.35779	45.4223	1.58818e-11	6.63721e-10	5.86659	5.71945	3.99645	5.98703	4.75512	4.81671
Solyc10g079690.2.1				1.07378	6.4039	45.4131	1.59565e-11	6.65742e-10	5.93025	5.75951	7.15349	5.59571	6.74307	6.5659
Solyc12g006600.2.1	IPR001876		Ran BP2/NZF zinc finger-like superfamily protein	1.07299	2.69864	45.227	1.75466e-11	7.30239e-10	2.04769	2.10101	3.22608	1.99439	3.17859	2.94233
Solyc10g080850.1.1				-1.4542	1.71532	45.1974	1.78139e-11	7.39571e-10	2.45157	2.01286	0.712795	2.22374	0.994533	0.627568
Solyc10g081800.2.1	IPR003172		MD-2-related lipid recognition domain-containing protein / ML domain-containing protein	-5.98033	-0.00520609	44.9188	2.05381e-11	8.48481e-10	1.87304	0.357284	-6.7078	-0.599451	-3.65943	-6.7078
Solyc01g109920.2.1	IPR000167	101259487	dehydrin LEA	-1.33088	5.15261	44.8955	2.07837e-11	8.57225e-10	6.06587	5.53791	4.27092	5.2894	4.12416	4.57878
Solyc05g051380.3.1	IPR001471		AINTEGUMENTA-like 7	-4.88529	-0.949745	44.8377	2.14057e-11	8.80005e-10	0.427865	-0.835146	-6.7078	-0.44954	-3.65943	-6.7078
Solyc11g066710.2.1	IPR003386		Lecithin:cholesterol acyltransferase family protein	-7.68004	-0.858929	44.5215	2.51577e-11	1.0259e-09	0.829746	-0.295455	-6.7078	-1.43082	-6.7078	-6.7078
Solyc06g076540.1.1	IPR002068		HSP20-like chaperones superfamily protein	1.04624	3.27974	44.0267	3.23932e-11	1.31247e-09	2.67212	2.51881	3.81495	2.75077	3.4321	3.81903
Solyc01g087590.3.1	IPR002937	101253022	polyamine oxidase 1	1.79634	1.66234	44.0273	3.23825e-11	1.31247e-09	-0.260943	0.44972	2.35394	0.944669	2.02845	2.37491
Solyc08g080290.3.1	IPR016177	101246746	Integrase-type DNA-binding superfamily protein	2.10055	0.801377	43.9664	3.34064e-11	1.34919e-09	-0.942679	-0.729991	1.5903	-0.380049	0.916915	1.68848
Solyc01g087060.3.1	IPR033276		RING/U-box superfamily protein	-2.89166	-0.589627	43.8086	3.62115e-11	1.45549e-09	-0.194581	-0.0227691	-2.46527	0.390055	-2.44613	-3.62629
Solyc03g121350.3.1	IPR007632	101247507		-3.61413	0.561276	43.7803	3.67378e-11	1.4743e-09	2.15339	1.25274	-2.46527	0.176024	-1.98235	-2.15967
Solyc04g082270.3.1	IPR004320		Arabidopsis protein of unknown function (DUF241)	1.02751	3.02452	43.7607	3.71073e-11	1.48677e-09	2.53217	2.24984	3.57652	2.42159	3.45973	3.25448
Solyc09g074530.3.1	IPR004316	101259076	senescence-associated gene 29	-2.80281	1.08808	43.617	3.99359e-11	1.58814e-09	2.57084	1.4889	-0.615387	1.1228	-1.11466	-1.07779
Solyc02g078480.3.1	IPR000644	101268829	CBS domain-containing protein	1.18705	2.00496	43.6108	4.00632e-11	1.59005e-09	1.19413	1.17363	2.43625	1.40461	2.43338	2.48022
Solyc11g011330.2.1	IPR002328	101259903	elicitor-activated gene 3-2	-3.39019	-0.436861	43.5082	4.22192e-11	1.67037e-09	0.509757	0.618522	-1.90594	-0.313751	-3.65943	-4.4652
Solyc01g104432.1.1			Nucleoporin autopeptidase	1.27236	3.82609	43.496	4.24829e-11	1.67818e-09	2.87115	3.02624	3.8497	3.21105	4.39137	4.60018
Solyc09g008980.2.1				-6.37141	-0.333161	43.4743	4.29572e-11	1.69426e-09	1.5049	-0.948573	-4.25303	-0.0214757	-6.7078	-6.7078
Solyc08g082260.2.1	IPR001932	101255229	highly ABA-induced PP2C gene 3	-6.28226	-0.440371	42.6804	6.44557e-11	2.50306e-09	1.42273	-0.54021	-6.7078	-0.599451	-4.4948	-6.7078
Solyc09g007810.3.1	IPR003340		auxin response factor 16	-1.00329	2.80205	42.4936	7.09145e-11	2.74849e-09	3.26818	3.04117	2.132	3.29312	2.29706	2.17269
Solyc01g009470.2.1	IPR004102		NAD+ ADP-ribosyltransferases;NAD+ ADP-ribosyltransferases	-4.00166	0.483232	42.1884	8.28881e-11	3.19429e-09	2.17865	0.15249	-1.90594	0.944669	-3.65943	-2.71413
Solyc06g007440.3.1	IPR004041		SOS3-interacting protein 4	2.06775	0.61855	42.1653	8.38747e-11	3.22739e-09	-0.942679	-1.35476	1.5903	-0.380049	0.994533	1.08152
Solyc09g008770.3.1	IPR004238	101265270	embryonic cell protein 63	-1.52193	6.34368	41.8786	9.71204e-11	3.72005e-09	7.47293	6.60463	5.37562	6.43131	5.33495	5.4571
Solyc01g108410.2.1	IPR002885		Tetratricopeptide repeat (TPR)-like superfamily protein	-1.06666	4.8798	41.8412	9.89967e-11	3.78617e-09	5.29335	5.37508	3.77032	5.27331	4.46366	4.40488
Solyc01g111270.3.1	IPR011989	101259003	armadillo repeat only 1	-1.97105	0.120681	41.8238	9.98792e-11	3.81415e-09	0.58725	0.733307	-1.33833	0.802458	-0.9122	-1.59541
Solyc07g053760.3.1	IPR001932		Protein phosphatase 2C family protein	1.28913	2.18237	41.808	1.0069e-10	3.83929e-09	0.951968	1.59391	2.77133	1.49985	2.59992	2.61245
Solyc08g075150.3.1		101256209		-1.06766	2.7247	41.5517	1.14794e-10	4.3508e-09	3.30878	3.18929	2.15995	2.93247	2.08868	2.00314
Solyc06g050700.3.1	IPR009818			-1.09507	4.56186	41.4785	1.19173e-10	4.50324e-09	5.0854	5.08744	4.22865	4.82843	3.90716	3.51548
Solyc03g095520.1.1				-2.66314	0.0448662	41.2982	1.30689e-10	4.909e-09	1.21869	0.618522	-2.46527	0.265482	-1.35025	-2.15967
Solyc10g009170.2.1	IPR007877		Protein of unknown function (DUF707)	-4.96041	-0.894609	41.2454	1.34266e-10	5.03587e-09	0.58725	-0.372517	-6.7078	-0.956059	-6.7078	-3.62629
Solyc05g009340.1.1		104647284		2.45004	1.17271	40.9059	1.59737e-10	5.97346e-09	-0.648101	-1.07168	2.32954	-0.131387	1.04405	2.01594
Solyc07g018290.3.1	IPR031112		AINTEGUMENTA-like 5	-4.69738	-0.673085	40.843	1.6496e-10	6.15054e-09	0.92237	-0.54021	-6.7078	-0.522549	-3.65943	-4.4652
Solyc06g075660.3.1	IPR017930		myb domain protein 48	3.407	-1.04878	40.7052	1.7702e-10	6.58075e-09	-4.35547	-4.26679	-0.5236	-3.08347	-0.653501	-0.148423
Solyc02g068877.1.1	IPR006766		EXORDIUM like 5	-1.34871	1.98044	40.6736	1.79904e-10	6.67812e-09	2.65423	2.60173	1.24362	2.15518	1.16088	1.00658
Solyc04g071780.3.1	IPR017972		Cytochrome P450 superfamily protein	-1.61391	2.61892	40.5334	1.93281e-10	7.16416e-09	3.65313	3.12766	1.5903	2.6547	1.46349	1.70438
Solyc12g096320.2.1	IPR013024	101258241	ChaC-like family protein	-1.22297	2.64417	40.2081	2.28298e-10	8.43734e-09	3.40287	2.87609	1.93577	3.01862	2.02845	1.70438
Solyc10g081570.2.1				1.6318	9.52434	40.0383	2.49033e-10	9.17677e-09	8.61366	8.60452	10.7148	8.214	9.68512	9.70818
Solyc10g005300.3.1	IPR011009	101257017	Protein kinase superfamily protein	-1.40941	1.46594	39.9719	2.57641e-10	9.45258e-09	1.91872	2.02793	0.0547338	1.98124	0.806468	0.692759
Solyc03g113440.3.1	IPR020846	101266711	Major facilitator superfamily protein	-7.12228	-1.33243	39.5502	3.19735e-10	1.16461e-08	0.0439956	-0.453928	-6.7078	-1.92953	-6.7078	-6.7078
Solyc01g096740.3.1	IPR020846		zinc induced facilitator-like 1	-1.59212	0.983202	39.2476	3.7333e-10	1.35205e-08	1.26659	1.78344	0.0547338	1.49985	-0.185662	-0.0385254
Solyc01g111610.3.1	IPR017066	101267168	SBP (S-ribonuclease binding protein) family protein	1.32723	1.89411	39.2133	3.7994e-10	1.37399e-08	1.21869	0.733307	2.3898	1.14654	2.1578	2.561
Solyc02g083550.2.1	IPR006121	101266291	farnesylated protein 6	-6.16935	-0.528893	39.122	3.98142e-10	1.4357e-08	1.31295	-0.222301	-4.25303	-1.174	-6.7078	-6.7078
Solyc06g068960.1.1	IPR002048		Calcium-binding EF-hand family protein	1.52576	2.20251	39.0453	4.14091e-10	1.48684e-08	1.24284	1.20048	3.19939	1.23779	2.43338	2.50765
Solyc06g072650.1.1	IPR003676	101265243	SAUR-like auxin-responsive protein family	-1.00732	4.29986	39.0216	4.19141e-10	1.50283e-08	4.88708	4.69041	4.02712	4.54331	3.5439	3.49735
Solyc10g006950.1.1				1.19585	2.78897	38.9617	4.32203e-10	1.54541e-08	1.97747	2.33713	3.4689	1.8134	3.24362	3.00784
Solyc06g069220.1.1	IPR032861	101266341	Eukaryotic aspartyl protease family protein	-3.88127	1.49303	38.8282	4.62785e-10	1.64299e-08	3.1896	2.37298	-1.5039	0.504722	-2.19569	-0.972955
Solyc05g053030.1.1	IPR002123		glycerol-3-phosphate acyltransferase 5	-7.29225	-1.17987	38.7848	4.73196e-10	1.67055e-08	0.509757	-1.20629	-6.7078	-1.2967	-6.7078	-6.7078
Solyc06g069260.1.1	IPR000136	101263037	Oleosin family protein	-6.79064	-1.58841	38.7442	4.83138e-10	1.70326e-08	-0.260943	-1.07168	-6.7078	-1.74347	-6.7078	-6.7078
Solyc01g106300.3.1	IPR028144			-3.92945	-0.730623	38.7335	4.85808e-10	1.71029e-08	0.549024	0.15249	-4.25303	-0.956059	-3.13381	-4.4652
Solyc06g062520.1.1	IPR003851	101260544	DOF zinc finger protein 1	-1.62105	0.724935	38.6753	5.00511e-10	1.75715e-08	1.42273	1.14627	-0.205646	1.21552	-0.734687	-0.148423
Solyc11g069240.2.1	IPR007087		C2H2-like zinc finger protein	1.29304	2.52424	38.4086	5.73799e-10	2.0033e-08	1.37981	1.74748	2.69696	1.95459	3.03902	3.22724
Solyc06g009000.1.1		104647783	Protein of unknown function (DUF581)	-5.88315	-0.781694	38.378	5.82848e-10	2.02927e-08	0.92237	-1.35476	-6.7078	-0.380049	-4.4948	-6.7078
Solyc04g077580.3.1	IPR009438	101255491	phytosulfokine 4 precursor	-4.60533	-1.17924	38.3534	5.90265e-10	2.05227e-08	0.149954	-0.631982	-4.25303	-1.174	-4.4948	-6.7078
Solyc07g005470.3.1	IPR003388		Reticulon family protein	-4.01998	-1.22054	38.3287	5.9777e-10	2.0755e-08	-0.330506	-0.222301	-3.391	-1.174	-6.7078	-4.4652
Solyc06g084280.1.1	IPR021410	101259261	Protein of unknown function (DUF3049)	-1.29908	1.57234	38.2935	6.08643e-10	2.11035e-08	1.88843	2.2239	0.95541	2.03311	0.623119	0.692759
Solyc02g088380.3.1	IPR003245		early nodulin-like protein 20	1.44015	2.33228	38.2517	6.21839e-10	2.1502e-08	1.42273	1.37565	3.28439	1.4625	2.53213	2.66213
Solyc07g038137.1.1	IPR012337		BED zinc finger ;hAT family dimerisation domain	1.60183	1.3199	38.1557	6.5317e-10	2.25545e-08	0.509757	0.15249	1.48373	0.0806514	1.84505	2.14965
Solyc01g006600.2.1	IPR009081			-6.31966	-1.93401	38.1044	6.70582e-10	2.31241e-08	-1.31325	-1.70728	-6.7078	-1.174	-6.7078	-6.7078
Solyc06g008620.1.1	IPR011659	101247825	tolB protein-related	-2.19482	0.683097	38.0306	6.9642e-10	2.39823e-08	1.28996	1.81854	-0.437305	0.802458	-0.820715	-1.31351
Solyc02g081500.3.1	IPR000719	101250956	Protein kinase superfamily protein	1.40333	1.13842	37.9574	7.23077e-10	2.48325e-08	0.149954	0.15249	1.78237	0.349714	1.49944	1.58925
Solyc06g072760.3.1	IPR006011		syntaxin of plants 21	-2.1451	-0.0136945	37.8256	7.73581e-10	2.65309e-08	0.861286	0.206478	-1.69096	0.64468	-1.79654	-1.19084
Solyc02g084315.1.1				2.16278	0.691972	37.7518	8.03419e-10	2.74796e-08	-0.942679	-0.54021	0.594872	-1.06092	1.48158	1.63972
Solyc02g084163.1.1	IPR004487		ATP-dependent Clp protease	2.16033	-0.191587	37.5818	8.76592e-10	2.99417e-08	-1.8132	-2.48122	0.169188	-1.2967	0.41303	0.523901
Solyc02g084285.1.1				2.5019	-0.598599	37.5256	9.0219e-10	3.07329e-08	-2.58463	-2.48122	-0.355881	-2.39408	0.121637	0.112059
Solyc12g088050.2.1	IPR011013		Rhamnogalacturonate lyase family protein	-1.38772	1.27259	37.355	9.84695e-10	3.33633e-08	1.82586	1.55282	0.275227	1.89976	0.253784	0.593833
Solyc09g009570.2.1	IPR016040		Jojoba acyl CoA reductase-related male sterility protein	-3.23121	-1.2673	37.3321	9.96322e-10	3.3712e-08	-0.648101	-0.54021	-4.25303	-0.766764	-3.65943	-3.62629
Solyc02g075625.1.1	IPR025422			-8.46903	-0.159507	37.3261	9.99395e-10	3.37707e-08	1.80978	0.493808	-6.7078	-2.39408	-6.7078	-6.7078
Solyc02g079290.3.1	IPR008914		PEBP (phosphatidylethanolamine-binding protein) family protein	-1.86965	1.10553	37.2348	1.04728e-09	3.52943e-08	2.14059	1.42202	0.275227	1.4813	-0.243902	-0.539529
Solyc11g008540.2.1	IPR000999		dicer-like 2	1.17126	2.89144	37.21	1.06067e-09	3.56979e-08	2.02001	2.37298	2.97388	2.10758	3.42277	3.55983
Solyc07g049660.3.1	IPR023213		HXXXD-type acyl-transferase family protein	1.0783	3.45822	37.0379	1.15858e-09	3.87863e-08	2.61776	2.56086	3.71486	3.15947	3.91384	4.01338
Solyc09g091620.2.1				-2.35041	-0.456904	36.9541	1.20944e-09	4.02752e-08	0.341044	-0.222301	-1.90594	0.265482	-2.44613	-2.15967
Solyc05g013450.3.1	IPR002528		root hair specific 2	-3.1308	-1.13915	36.9083	1.23815e-09	4.11771e-08	-0.648101	-0.222301	-4.25303	-0.680684	-3.65943	-3.09929
Solyc06g051240.1.1				1.92044	0.45714	36.8794	1.25669e-09	4.17386e-08	-0.942679	-1.20629	0.594872	-0.599451	1.06819	1.30646
Solyc09g007510.2.1	IPR013320		Concanavalin A-like lectin protein kinase family protein	-1.10085	2.14994	36.8258	1.29173e-09	4.28459e-08	2.65423	2.63163	1.4388	2.45049	1.65095	1.32714
Solyc08g013845.1.1	IPR002213		UDP-Glycosyltransferase superfamily protein	-7.81749	-0.744306	36.8204	1.29527e-09	4.29071e-08	1.09149	-0.152679	-6.7078	-2.14319	-6.7078	-6.7078
Solyc12g089250.1.1	IPR015202	101261106	glyoxal oxidase-related protein	-5.85937	-0.112115	36.8017	1.30779e-09	4.32085e-08	1.85748	0.0380471	-6.7078	-0.956059	-6.7078	-3.62629
Solyc10g005950.3.1	IPR000086	101263765	nudix hydrolase homolog 2	1.28372	3.03156	36.6735	1.39666e-09	4.59641e-08	1.93364	2.44212	3.31579	2.2892	3.26466	3.88676
Solyc09g089950.1.1				-7.08755	-1.35676	36.4707	1.54981e-09	5.07396e-08	0.200151	-0.835146	-6.7078	-1.92953	-6.7078	-6.7078
Solyc07g056690.2.1	IPR025521		Protein of Unknown Function (DUF239)	2.45742	-0.638487	36.4646	1.55468e-09	5.08332e-08	-2.02753	-4.26679	-0.00608918	-2.14319	-0.129682	-0.0385254
Solyc07g053170.3.1			mitogen-activated protein kinase kinase kinase 9	1.12239	4.878	36.2991	1.69241e-09	5.49804e-08	4.12531	3.9443	4.93261	4.48862	5.38865	5.58387
Solyc06g082420.3.1	IPR019794		Peroxidase superfamily protein	1.29304	1.25193	36.2418	1.74293e-09	5.65489e-08	0.58725	0.206478	1.72738	0.429299	1.68257	1.7201
Solyc03g119100.2.1	IPR008914	101257645	PEBP (phosphatidylethanolamine-binding protein) family protein	-6.32792	-1.93218	36.1116	1.86335e-09	6.01466e-08	-1.05595	-1.20629	-6.7078	-1.92953	-6.7078	-6.7078
Solyc12g070080.2.1	IPR000120		fatty acid amide hydrolase	-1.17077	2.12038	36.096	1.87828e-09	6.0551e-08	2.77507	2.49731	1.16304	2.42159	1.46349	1.53696
Solyc01g090360.3.1	IPR016140	101259287	Bifunctional inhibitor/lipid-transfer protein/seed storage 2S albumin superfamily protein	-5.26254	6.23199	35.9776	1.99601e-09	6.42642e-08	7.93749	6.82448	2.35394	6.34094	2.60818	-1.94612
Solyc04g025650.3.1	IPR002938	101260928	monooxygenase 1	1.0533	3.42492	35.8676	2.11188e-09	6.76244e-08	2.84772	2.3964	3.94516	3.05043	3.65165	3.92796
Solyc02g092070.3.1	IPR014978		growth-regulating factor 2	-6.74399	-1.61779	35.7538	2.23899e-09	7.14497e-08	-0.194581	-1.70728	-6.7078	-1.43082	-6.7078	-6.7078
Solyc04g074540.2.1	IPR016040		GroES-like zinc-binding dehydrogenase family protein	-2.28428	0.0969211	35.6207	2.39731e-09	7.62126e-08	1.16915	0.404242	-1.18982	0.541005	-1.22765	-2.41043
Solyc03g034320.3.1	IPR029062	101258830	Class I glutamine amidotransferase-like superfamily protein	-2.12918	-0.418705	35.4854	2.56967e-09	8.1181e-08	0.295591	0.096403	-2.15867	0.0806514	-2.19569	-1.59541
Solyc03g116725.1.1				2.6376	-0.697057	34.788	3.67624e-09	1.14e-07	-2.27936	-2.17479	-0.355881	-4.4516	-0.185662	0.158953
Solyc07g049610.1.1	IPR004263	101263331	glycosyltransferase 18	1.05051	3.43181	34.6132	4.0216e-09	1.24099e-07	2.52234	2.85088	3.95317	2.99265	3.53093	4.02924
Solyc06g011350.3.1	IPR000425	100529106	plasma membrane intrinsic protein 2	-1.07299	3.15045	34.6057	4.03715e-09	1.24427e-07	3.57919	3.77151	2.8334	3.37077	2.37653	2.27202
Solyc01g011430.3.1	IPR004255		O-acyltransferase (WSD1-like) family protein	-2.57947	1.1648	34.5362	4.18406e-09	1.28641e-07	2.6085	1.03131	-0.818589	1.62344	-0.185662	-1.19084
Solyc03g120690.3.1	IPR001372	109119892	RHO guanyl-nucleotide exchange factor 11	-1.08772	2.18094	34.5088	4.24324e-09	1.30301e-07	2.68099	2.70848	1.70858	2.42159	1.46349	1.38745
Solyc04g081960.1.1		101247816		1.27555	1.59309	33.8677	5.89899e-09	1.77688e-07	0.797501	0.404242	2.17373	1.04914	1.89987	2.0904
Solyc12g055870.2.1	IPR004316	101263002	Nodulin MtN3 family protein	-7.55715	-0.97939	33.8647	5.90816e-09	1.77752e-07	0.58725	0.096403	-6.7078	-2.69798	-6.7078	-6.7078
Solyc02g089495.1.1				2.00314	2.25276	33.6597	6.56451e-09	1.96795e-07	1.03729	0.44972	2.07441	1.09866	2.77143	3.48819
Solyc06g076420.1.1		101249466		-6.25214	-0.486338	33.6558	6.57786e-09	1.96961e-07	1.26659	0.404242	-6.7078	-2.14319	-6.7078	-4.4652
Solyc12g042910.2.1	IPR014729	101262697	DNA photolyase family protein	1.20292	1.43449	33.4738	7.22298e-09	2.15003e-07	0.624489	0.906393	1.88642	0.467504	1.88636	1.84006
Solyc08g023270.3.1		101267725	myosin heavy chain-related	-1.00446	3.27025	33.4032	7.49015e-09	2.22693e-07	3.87794	3.29274	2.75309	3.79176	2.63266	2.63751
Solyc06g072460.1.1	IPR004146		Cysteine/Histidine-rich C1 domain family protein	1.16301	1.75451	33.3987	7.50739e-09	2.22943e-07	1.19413	0.733307	2.27945	1.09866	2.05285	2.22871
Solyc05g005960.3.1	IPR018456	101261620	Major facilitator superfamily protein	-1.22457	1.25102	33.3249	7.79785e-09	2.31025e-07	1.58265	1.72915	0.420964	1.78343	0.521895	0.487621
Solyc12g041875.1.1	IPR008147		glutamine synthase clone F11	-7.12916	-1.31195	33.3183	7.82445e-09	2.31541e-07	0.427865	-1.70728	-6.7078	-1.43082	-6.7078	-6.7078
Solyc04g056380.3.1	IPR009617	101250011	Putative adipose-regulatory protein (Seipin)	-2.32687	1.29853	33.2728	8.00968e-09	2.36192e-07	2.75001	1.42202	-0.5236	1.40461	-0.243902	-0.20668
Solyc11g006290.2.1	IPR001104	101255051	3-oxo-5-alpha-steroid 4-dehydrogenase family protein	-1.03554	2.96075	33.2519	8.09599e-09	2.38458e-07	3.52606	3.21585	2.66805	3.37077	2.21296	2.10245
Solyc07g054430.3.1	IPR013802	101260836	transferases;folic acid binding	-1.59345	1.46779	33.2116	8.26556e-09	2.43169e-07	1.9484	2.45333	0.466445	1.57176	0.590161	0.248402
Solyc03g033690.2.1	IPR019794	101246220	Peroxidase superfamily protein	-5.83608	0.335342	33.0548	8.95987e-09	2.62068e-07	2.4307	0.258518	-6.7078	-0.766764	-6.7078	-3.09929
Solyc02g089510.3.1				1.86401	2.38409	32.975	9.33529e-09	2.72021e-07	1.06464	1.17363	2.01443	1.1699	3.17859	3.43679
Solyc01g080030.2.1	IPR011032		Zinc-binding dehydrogenase family protein	-2.52556	0.781967	32.9733	9.34326e-09	2.72021e-07	2.22787	0.873398	-1.05518	0.997847	-1.48423	-0.616418
Solyc07g041740.1.1	IPR012337			4.50331	-1.80287	32.9448	9.48111e-09	2.75717e-07	-6.7078	-4.26679	-1.33833	-6.7078	-1.22765	-1.31351
Solyc11g008260.2.1	IPR000668	101266086	Papain family cysteine protease	-1.69402	3.53681	32.9282	9.56239e-09	2.7776e-07	4.80633	3.63052	2.30471	3.65774	2.54938	2.48022
Solyc09g090080.1.1	IPR020846		phosphate transporter 1;7	-1.75463	0.345076	32.7218	1.06336e-08	3.0711e-07	0.980972	1.17363	-0.932039	0.504722	-0.820715	-0.7837
Solyc12g095810.2.1	IPR000109	101245241	Major facilitator superfamily protein	-1.19873	1.47239	32.6402	1.10894e-08	3.19454e-07	1.88843	2.05761	0.95541	1.8134	0.623119	0.593833
Solyc02g079490.3.1	IPR023213	101246106	HXXXD-type acyl-transferase family protein	-1.18945	2.90236	32.6227	1.11899e-08	3.20608e-07	3.59335	3.19597	2.56728	3.28244	2.08868	1.79623
Solyc02g023950.3.1	IPR011009	101265972	Leucine-rich receptor-like protein kinase family protein	-1.93635	-0.324907	32.3647	1.27786e-08	3.63651e-07	0.24866	0.096403	-2.15867	0.308213	-1.63195	-1.44759
Solyc01g094120.3.1	IPR001128		cytochrome P450, family 704, subfamily A, polypeptide 2	-6.71081	-1.64597	32.3062	1.31696e-08	3.73933e-07	-0.131137	-1.70728	-6.7078	-1.74347	-6.7078	-6.7078
Solyc10g006960.2.1	IPR001841		RING membrane-anchor 3	1.63447	0.859058	32.2599	1.34869e-08	3.82514e-07	-0.260943	-0.835146	1.67022	0.176024	1.18316	1.30646
Solyc12g098600.1.1	IPR002213		UDP-Glycosyltransferase superfamily protein	1.70711	0.229304	32.1569	1.4221e-08	4.01977e-07	-0.648101	-1.20629	0.986964	-1.06092	0.590161	0.660532
Solyc01g107340.3.1		101245805	arabinogalactan protein 18	1.0867	2.14776	32.1523	1.42545e-08	4.02475e-07	1.5636	1.51052	2.76224	1.36468	2.33734	2.57836
Solyc02g091030.3.1	IPR027170		nuclear factor Y, subunit C4	1.35734	1.72374	31.8783	1.64137e-08	4.61375e-07	1.0094	1.08993	1.88642	0.390055	2.35707	2.32438
Solyc01g108720.2.1				-3.72698	-1.13538	31.7096	1.79034e-08	5.01016e-07	-0.480582	0.096403	-2.85513	-1.174	-6.7078	-4.4652
Solyc03g031830.1.1	IPR013083		RING/U-box superfamily protein	-2.60651	-0.263384	31.6103	1.88432e-08	5.25569e-07	1.0094	0.15249	-1.90594	-0.189651	-2.44613	-2.15967
Solyc12g038160.2.1	IPR006693	101266611	alpha/beta-Hydrolases superfamily protein	-1.0901	2.05435	31.5349	1.95883e-08	5.45749e-07	2.71591	2.33713	1.4158	2.35182	1.31002	1.44535
Solyc11g066580.2.1	IPR001128		Cytochrome P450 superfamily protein	-7.11386	-1.33359	31.2415	2.2784e-08	6.29916e-07	0.427865	-1.20629	-6.7078	-2.14319	-6.7078	-6.7078
Solyc11g007390.1.1	IPR002213		UDP-Glycosyltransferase superfamily protein	-1.35608	1.04931	31.2296	2.29239e-08	6.3309e-07	1.5443	1.30316	0.0547338	1.70565	0.0262963	0.412204
Solyc02g081600.3.1	IPR003689	101260003	zinc transporter 5 precursor	-1.66859	0.22971	31.1779	2.35431e-08	6.48997e-07	0.549024	0.938651	-0.615387	0.772252	-1.35025	-0.7837
Solyc06g070960.2.1	IPR017871		ATP-binding cassette A2	-6.72581	-1.64445	31.1772	2.35513e-08	6.48997e-07	-0.194581	-1.07168	-6.7078	-2.39408	-6.7078	-6.7078
Solyc01g096790.3.1	IPR003340		AP2/B3-like transcriptional factor family protein	1.09894	2.88019	31.1353	2.40659e-08	6.62456e-07	2.16607	2.19748	3.68631	2.2785	3.09296	3.08878
Solyc12g008320.2.1	IPR020846	101264101	sugar transporter 14	-2.29296	0.502072	30.7786	2.89207e-08	7.86656e-07	1.67429	1.14627	-0.437305	0.504722	-1.79654	-1.31351
Solyc04g079460.1.1	IPR023796		Serine protease inhibitor (SERPIN) family protein	2.28743	0.180056	30.7491	2.93634e-08	7.97838e-07	-1.17887	-2.17479	0.275227	-1.2967	0.521895	1.34752
Solyc08g081370.1.1	IPR011016	101250533	brassinosteroid-responsive RING-H2	-1.11649	1.8533	30.6481	3.09331e-08	8.37782e-07	2.2987	2.48644	1.26951	2.0458	1.16088	1.08152
Solyc04g079450.3.1	IPR000215		Serine protease inhibitor (SERPIN) family protein	1.92472	0.436062	30.6319	3.11928e-08	8.43911e-07	-0.480582	-1.20629	0.420964	-1.174	1.33012	1.08152
Solyc08g081160.3.1	IPR025486	101256207	Protein of unknown function (DUF3741)	-1.11175	1.72249	30.5922	3.1837e-08	8.58579e-07	2.22787	2.02793	0.986964	2.1784	1.26896	0.814919
Solyc05g005370.2.1	IPR009072	104647249	Histone superfamily protein	-6.59976	-1.73481	30.4844	3.36565e-08	9.06677e-07	-0.260943	-1.52028	-6.7078	-2.14319	-6.7078	-6.7078
Solyc03g093535.1.1				-1.48968	1.12579	30.4464	3.43225e-08	9.22651e-07	1.65642	1.83577	0.674548	1.44346	-0.0238458	-0.267388
Solyc03g078730.2.1	IPR002213		UDP-Glycosyltransferase superfamily protein	1.08872	1.6487	30.3504	3.60629e-08	9.66348e-07	0.951968	0.733307	2.08903	1.1699	2.0407	2.04119
Solyc02g084170.2.1	IPR019489		ATP-dependent Clp protease	2.733	-0.752031	30.295	3.71081e-08	9.92249e-07	-3.50413	-1.92218	0.325459	-3.6111	-0.434214	-0.397051
Solyc09g009490.3.1	IPR004827	104649075	Basic-leucine zipper (bZIP) transcription factor family protein	-6.67937	-1.67452	30.2098	3.87741e-08	1.03242e-06	-0.131137	-1.52028	-6.7078	-2.14319	-6.7078	-6.7078
Solyc02g091390.3.1		101258509		-1.4097	2.97519	30.126	4.04866e-08	1.07349e-06	4.04519	3.21585	2.10349	3.05043	2.22375	1.9508
Solyc02g082900.3.1	IPR004141	101253341	Calcium-dependent phosphotriesterase superfamily protein	-1.32772	2.28026	30.0975	4.10866e-08	1.08826e-06	3.17712	2.72707	1.6107	2.32085	1.46349	1.28548
Solyc01g090310.2.1	IPR001471		ethylene-responsive element binding factor 13	3.84763	-1.67872	29.8896	4.5736e-08	1.20257e-06	-4.35547	-6.7078	-0.818589	-4.4516	-1.48423	-1.19084
Solyc06g009810.3.1				-1.09275	1.85405	29.7854	4.82606e-08	1.26631e-06	2.23992	2.2879	1.50568	2.29983	1.09193	0.927537
Solyc12g089300.2.1	IPR003854	101248656	GAST1 protein homolog 1	-1.3775	3.67754	29.7515	4.91138e-08	1.28469e-06	4.22869	4.39734	3.41192	3.95528	2.39573	2.45225
Solyc04g077510.3.1	IPR014978	101252681	growth-regulating factor 1	-4.42339	-1.9327	29.703	5.03572e-08	1.31585e-06	-1.31325	-1.20629	-6.7078	-1.74347	-6.7078	-4.4652
Solyc02g091860.3.1	IPR013210	101248440	HAESA-like 2	-1.50795	0.404001	29.5205	5.53285e-08	1.4398e-06	0.92237	0.696051	-0.5236	1.04914	-0.9122	-0.397051
Solyc06g074750.1.1	IPR007125	101244086	Histone superfamily protein	-1.44898	2.78139	29.4186	5.83166e-08	1.51443e-06	3.8507	3.01871	1.76427	2.89791	2.13512	1.67241
Solyc03g005290.2.1				-3.58682	-0.262083	29.3965	5.89846e-08	1.52863e-06	1.40143	-0.152679	-2.15867	-0.380049	-3.13381	-4.4652
Solyc04g078200.3.1	IPR003854		Gibberellin-regulated family protein	-3.70796	-1.45571	29.3887	5.92206e-08	1.53317e-06	-0.330506	-0.948573	-3.391	-1.43082	-4.4948	-6.7078
Solyc04g080910.1.1	IPR016177	101246344	Integrase-type DNA-binding superfamily protein	-7.13489	-1.31126	29.328	6.11056e-08	1.57874e-06	0.549024	-1.70728	-6.7078	-1.92953	-6.7078	-6.7078
Solyc07g006600.1.1		101265448	glutamine dumper 3	-1.00758	5.82184	29.2921	6.22486e-08	1.60629e-06	6.30684	6.29774	5.6698	6.10154	4.96571	4.93594
Solyc07g056190.3.1			Heavy metal transport/detoxification superfamily protein	-1.39307	0.960321	29.1879	6.56877e-08	1.68848e-06	1.4644	1.72915	0.0547338	1.1228	0.0262963	0.112059
Solyc10g078670.2.1	IPR004827		bZIP transcription factor family protein	-3.17642	-0.263691	29.0372	7.10006e-08	1.81396e-06	1.31295	-0.0862622	-2.85513	-0.380049	-2.19569	-3.09929
Solyc04g072030.1.1	IPR022812	101257363	Dynamin related protein 4C	-1.09534	1.60457	29.0033	7.22544e-08	1.83855e-06	1.9484	2.07222	1.1904	2.0458	0.890086	0.692759
Solyc03g111290.1.1	IPR001128		cytochrome P450, family 94, subfamily B, polypeptide 3	3.08251	-1.29588	28.97	7.35064e-08	1.86853e-06	-4.35547	-4.26679	-0.713414	-3.08347	-0.434214	-1.19084
Solyc12g006360.2.1	IPR002528		MATE efflux family protein	-4.30004	-1.01924	28.8398	7.86196e-08	1.9865e-06	0.427865	-0.222301	-6.7078	-1.74347	-4.4948	-3.62629
Solyc01g008940.2.1				-4.9005	-0.930203	28.6882	8.50188e-08	2.14176e-06	0.861286	-1.20629	-4.25303	-1.174	-4.4948	-6.7078
Solyc06g075170.1.1	IPR007608	101262623	Protein of unknown function, DUF584	-1.04188	2.39682	28.682	8.52939e-08	2.14655e-06	2.82391	2.98049	2.07441	2.6127	1.61863	1.58925
Solyc09g098050.2.1	IPR002110		Ankyrin repeat family protein	1.29644	4.04528	28.5898	8.94512e-08	2.24223e-06	3.23846	2.79912	4.17486	3.59008	4.33031	4.98719
Solyc03g094060.3.1	IPR000504		polyadenylate-binding protein 1	-1.1252	1.8747	28.5479	9.14107e-08	2.28454e-06	2.32155	2.55046	1.04807	2.02032	1.28964	1.19837
Solyc02g089350.3.1	IPR003854	101248254	Gibberellin-regulated family protein	1.31615	0.828699	28.4851	9.44242e-08	2.35519e-06	0.200151	0.0380471	1.34451	-0.380049	1.18316	1.30646
Solyc01g111540.3.1	IPR000922		glycosyl hydrolase family 35 protein	1.1105	1.47789	28.0617	1.17506e-07	2.89656e-06	0.829746	0.696051	1.78237	0.802458	1.77345	2.07826
Solyc03g025430.1.1		101256847		-2.09951	0.485563	28.0519	1.18103e-07	2.90561e-06	1.65642	0.308746	-0.932039	1.07411	-1.35025	-0.697636
Solyc01g079670.2.1	IPR008480	101244226		1.15411	3.4279	27.9288	1.25861e-07	3.08204e-06	2.52234	2.40797	3.70066	3.13	3.67148	4.20152
Solyc06g066270.1.1	IPR001128		cytochrome P450, family 76, subfamily C, polypeptide 4	-4.58716	-0.462185	27.8293	1.32501e-07	3.23775e-06	1.24284	0.308746	-6.7078	-1.74347	-3.13381	-4.4652
Solyc01g091420.2.1	IPR004883	101256138	Lateral organ boundaries (LOB) domain family protein	-1.24687	1.76655	27.6598	1.44636e-07	3.51724e-06	2.47215	2.30036	1.16304	1.88572	1.13826	0.627568
Solyc06g064520.3.1	IPR001547		Glycosyl hydrolase superfamily protein	-6.55429	-1.76633	27.5582	1.52438e-07	3.69984e-06	-0.194581	-1.92218	-6.7078	-2.14319	-6.7078	-6.7078
Solyc09g075270.1.1	IPR007493		Protein of unknown function, DUF538	-1.36165	1.07683	27.5368	1.54137e-07	3.7339e-06	1.70937	1.71059	0.553321	1.23779	-0.0238458	0.0635902
Solyc12g096890.1.1	IPR025886		phloem protein 2-B10	1.32441	1.12209	27.4997	1.57116e-07	3.80242e-06	0.469392	0.404242	1.6107	-0.131387	1.33012	1.78133
Solyc09g091530.2.1	IPR029063		S-adenosyl-L-methionine-dependent methyltransferases superfamily protein	2.09015	-0.142651	27.393	1.66034e-07	4.01439e-06	-2.27936	-1.70728	0.890153	-1.174	0.295273	0.0134357
Solyc07g063560.3.1	IPR025520		Protein of unknown function (DUF761)	-2.41254	-0.147643	27.2941	1.74747e-07	4.20895e-06	1.16915	0.096403	-2.15867	-0.0753848	-1.79654	-1.76013
Solyc03g034410.1.1	IPR025322	104646198		2.38704	-0.696331	27.2853	1.75545e-07	4.22413e-06	-2.27936	-4.26679	-0.0695897	-1.92953	-0.576642	0.158953
Solyc07g064650.2.1	IPR007608		Protein of unknown function, DUF584	-1.14855	1.16289	27.2695	1.76984e-07	4.25469e-06	1.74362	1.44466	0.420964	1.55412	0.41303	0.487621
Solyc02g067050.3.1	IPR003774	101247689	Protein of unknown function (DUF179)	1.8997	-0.322519	27.2547	1.78342e-07	4.28327e-06	-1.46145	-2.17479	-0.136014	-1.57869	0.450238	0.158953
Solyc12g005920.2.1	IPR001715	101250477	fimbrin-like protein 2	3.81277	-1.7077	27.225	1.81101e-07	4.34539e-06	-4.35547	-6.7078	-0.713414	-4.4516	-1.63195	-1.31351
Solyc07g063320.3.1	IPR012341	101250427	G protein coupled receptor	-1.95169	2.34732	27.0889	1.94313e-07	4.65356e-06	3.77406	2.31272	1.26951	2.43129	0.862748	1.00658
Solyc03g006410.3.1	IPR006502		Protein of unknown function (DUF506)	-4.31577	-2.00447	26.9928	2.04213e-07	4.87677e-06	-1.31325	-1.35476	-4.25303	-1.92953	-6.7078	-6.7078
Solyc04g009260.2.1				1.23196	1.52724	26.9127	2.12851e-07	5.05911e-06	0.149954	1.00108	2.10349	0.944669	1.88636	1.93742
Solyc09g010980.1.1				1.07735	2.86117	26.8887	2.15512e-07	5.11273e-06	1.97747	2.02793	3.50203	2.54285	2.95738	3.35356
Solyc04g072740.3.1	IPR002645	101245940	STAS domain / Sulfate transporter family	1.58671	0.111864	26.8532	2.19512e-07	5.19785e-06	-1.62663	-0.729991	0.553321	-0.766764	0.717705	0.487621
Solyc05g009310.3.1	IPR000315	101253781	B-box type zinc finger protein with CCT domain	-1.5088	0.014582	26.8428	2.20692e-07	5.22091e-06	0.469392	0.493808	-1.05518	0.504722	-1.00988	-0.972955
Solyc07g055690.1.1	IPR001480		S-locus lectin protein kinase family protein	-1.53557	0.471052	26.8324	2.21883e-07	5.24417e-06	0.764518	1.35189	-0.437305	0.772252	-0.734687	-0.466532
Solyc02g087450.3.1		101263070		1.8314	-0.316857	26.8007	2.25553e-07	5.32095e-06	-2.02753	-1.20629	0.325459	-1.74347	-0.0757937	0.291129
Solyc08g066310.2.1	IPR001611		Protein kinase family protein with leucine-rich repeat domain	1.49244	0.702708	26.7765	2.28393e-07	5.3829e-06	-0.561911	-0.0862622	1.52731	-0.250367	0.834883	1.17574
Solyc03g112440.1.1	IPR000136	101263398	Oleosin family protein	-1.86748	4.84328	26.7618	2.30137e-07	5.41896e-06	6.28956	5.00225	3.88362	4.63218	3.52222	3.43203
Solyc06g009290.3.1	IPR011527		P-glycoprotein 21	-1.47528	0.593056	26.7188	2.35316e-07	5.52641e-06	1.11784	1.39902	-0.355881	0.709876	-0.434214	-0.330763
Solyc06g008265.1.1	IPR003591		Protein kinase family protein with leucine-rich repeat domain	-1.58685	0.0330734	26.714	2.35904e-07	5.52895e-06	0.696202	0.44972	-1.18982	0.429299	-1.35025	-0.697636
Solyc06g066820.3.1	IPR005123		gibberellin 3-oxidase 1	-3.15965	-1.56302	26.6771	2.40449e-07	5.62503e-06	-1.17887	-0.835146	-6.7078	-1.06092	-2.74938	-6.7078
Solyc12g011030.2.1	IPR000757		xyloglucan endotransglucosylase/hydrolase 16	1.27198	1.27627	26.5686	2.54338e-07	5.91161e-06	0.660791	0.308746	1.95185	0.390055	1.3695	1.8256
Solyc06g075070.3.1	IPR001148		alpha carbonic anhydrase 7	-5.30816	-0.599762	26.4409	2.71726e-07	6.30995e-06	1.40143	-1.07168	-6.7078	-1.2967	-6.7078	-3.62629
Solyc09g005730.3.1	IPR006476		Plant protein 1589 of unknown function	1.42646	0.919683	26.3883	2.79231e-07	6.46472e-06	0.0439956	-0.152679	1.4158	0.0304913	1.7135	0.980712
Solyc07g008390.2.1	IPR000719		Malectin/receptor-like protein kinase family protein	-5.22877	-1.33523	26.1636	3.13673e-07	7.20449e-06	0.385108	-1.70728	-6.7078	-1.57869	-4.4948	-6.7078
Solyc07g053360.3.1	IPR004238	101259649	late embryogenesis abundant domain-containing protein / LEA domain-containing protein	-1.28923	5.59977	26.036	3.35111e-07	7.66202e-06	6.70799	5.75045	4.71669	5.58271	4.89494	4.82582
Solyc07g054770.1.1	IPR022251	101254505	Wound-responsive family protein	1.10568	5.08849	25.9381	3.52536e-07	8.00964e-06	4.34759	4.80202	5.88187	4.04012	5.47581	5.15851
Solyc08g059710.3.1	IPR019448			1.41446	0.534301	25.8325	3.72371e-07	8.4224e-06	-0.260943	-0.729991	0.92315	-0.313751	0.777483	1.24258
Solyc02g072570.2.1	IPR025422	104646037		-6.55705	-1.76609	25.7838	3.81886e-07	8.62988e-06	-0.131137	-1.92218	-6.7078	-2.39408	-6.7078	-6.7078
Solyc08g081220.1.1	IPR001128	101254719	cytochrome P450, family 86, subfamily A, polypeptide 8	-4.27246	0.305869	25.7818	3.8228e-07	8.63106e-06	2.20347	0.618522	-3.391	-0.599451	-6.7078	-1.94612
Solyc03g121940.3.1	IPR001289		nuclear factor Y, subunit A3	-1.08893	1.62126	25.7594	3.86747e-07	8.7241e-06	1.90366	2.17057	0.674548	2.03311	1.24798	0.843908
Solyc08g007830.1.1	IPR001471	101248897	Integrase-type DNA-binding superfamily protein	1.39287	1.55335	25.7422	3.90192e-07	8.78611e-06	0.427865	0.308746	1.72738	1.07411	1.91326	2.39464
Solyc02g085400.3.1	IPR002781		Sulfite exporter TauE/SafE family protein	1.67464	0.247311	25.7333	3.92008e-07	8.81129e-06	-1.31325	-0.631982	0.466445	-0.858309	0.556432	1.1294
Solyc10g006080.2.1	IPR006153		Na+/H+ (sodium hydrogen) exchanger 3	-4.58119	-0.173341	25.6528	4.08711e-07	9.17039e-06	1.80978	-0.0227691	-4.25303	-1.57869	-4.4948	-3.09929
Solyc07g015910.3.1	IPR000620	101247234	nodulin MtN21 /EamA-like transporter family protein	-2.45523	-0.628635	25.5058	4.41064e-07	9.84381e-06	0.549024	-0.152679	-2.15867	-0.680684	-2.44613	-2.71413
Solyc10g083670.2.1	IPR029044		Nucleotide-diphospho-sugar transferases superfamily protein	-1.81648	0.694547	25.5016	4.42016e-07	9.85634e-06	1.82586	1.20048	-0.5236	0.576397	-0.434214	-0.616418
Solyc10g055200.1.1	IPR004265	101250259	Disease resistance-responsive (dirigent-like protein) family protein	1.29475	1.11597	25.4232	4.60343e-07	1.02336e-05	0.200151	0.404242	1.36867	0.221446	1.89987	1.34752
Solyc03g119310.3.1		101260626		-1.0435	1.4745	25.3988	4.66208e-07	1.0341e-05	1.85748	1.93505	1.1067	1.82816	0.68686	0.692759
Solyc10g080410.2.1	IPR025422		bZIP transcription factor family protein	-4.75427	-1.67676	25.3252	4.84345e-07	1.07056e-05	-0.403593	-2.48122	-4.25303	-1.06092	-6.7078	-6.7078
Solyc05g015890.3.1		101252688		-1.57631	1.90083	25.3137	4.87246e-07	1.07603e-05	3.06646	2.04285	1.04807	2.02032	0.969121	0.627568
Solyc02g093020.3.1	IPR004158	101246680	Plant protein of unknown function (DUF247)	-1.07323	1.46391	25.2652	4.99635e-07	1.09955e-05	1.7266	1.96668	1.07769	1.91367	0.717705	0.593833
Solyc03g006360.3.1	IPR008406	101257929	dormancy-associated protein-like 1	-5.40211	-1.17893	25.2214	5.1113e-07	1.12386e-05	0.660791	-1.35476	-4.25303	-1.92953	-6.7078	-6.7078
Solyc02g065570.1.1	IPR012552	104645948	ROTUNDIFOLIA like 18	-1.20435	2.15798	25.0661	5.53982e-07	1.21175e-05	2.75001	2.41944	0.750054	2.66295	1.51708	1.76626
Solyc02g085020.3.1	IPR001509		dihydroflavonol 4-reductase	-4.03238	-1.22318	24.947	5.89282e-07	1.2822e-05	0.341044	-1.20629	-6.7078	-1.43082	-3.65943	-4.4652
Solyc02g072040.3.1		104645869		-5.71677	-2.33816	24.8271	6.27107e-07	1.35759e-05	-2.02753	-2.48122	-6.7078	-1.57869	-6.7078	-6.7078
Solyc10g079590.1.1	IPR006476	101257030	Plant protein 1589 of unknown function	-6.05702	-2.12079	24.8076	6.33468e-07	1.36901e-05	-0.83766	-2.17479	-6.7078	-2.39408	-6.7078	-6.7078
Solyc08g005318.1.1	IPR032675		F-box/RNI-like superfamily protein	1.26294	0.651359	24.7176	6.63758e-07	1.42835e-05	0.0439956	-0.453928	1.1067	-0.189651	0.943254	1.17574
Solyc09g010470.3.1	IPR020846	101264454	Major facilitator superfamily protein	-1.32672	0.448705	24.6475	6.88348e-07	1.47623e-05	0.951968	1.06092	-0.355881	0.677646	-0.503671	-0.397051
Solyc02g082070.3.1	IPR017972	101247777	cytochrome P450, family 71, subfamily B, polypeptide 34	-1.40881	0.352672	24.5913	7.0871e-07	1.51347e-05	1.0094	0.618522	-1.05518	0.802458	-0.367947	-0.466532
Solyc09g014950.2.1		104649041		-6.11001	-2.08162	24.5785	7.13423e-07	1.52097e-05	-0.73977	-2.48122	-6.7078	-2.14319	-6.7078	-6.7078
Solyc09g074910.1.1	IPR004307	101251222	TSPO(outer membrane tryptophan-rich sensory protein)-related	-1.45105	2.80676	24.5549	7.22233e-07	1.53845e-05	3.94571	2.88439	2.20089	2.95281	1.74379	1.70438
Solyc04g078370.3.1	IPR001128		cytochrome P450, family 81, subfamily K, polypeptide 2	-5.4057	-1.21833	24.4662	7.56269e-07	1.60418e-05	0.149954	-0.0227691	-6.7078	-3.08347	-6.7078	-4.4652
Solyc01g111430.2.1	IPR002885		Pentatricopeptide repeat (PPR) superfamily protein	1.44521	0.375933	24.4474	7.63684e-07	1.61855e-05	-0.83766	-0.729991	0.986964	-0.313751	0.969121	0.523901
Solyc04g064760.3.1	IPR029058		serine carboxypeptidase-like 42	-1.33445	0.455215	24.4433	7.65302e-07	1.62062e-05	1.09149	0.938651	-0.278809	0.677646	-0.434214	-0.539529
Solyc03g026120.3.1	IPR004159	101267776	S-adenosyl-L-methionine-dependent methyltransferases superfamily protein	-3.08825	-0.687186	24.4217	7.7392e-07	1.63612e-05	0.829746	-0.54021	-2.85513	-0.858309	-3.65943	-2.71413
Solyc12g056980.1.1	IPR001471		related to AP2 4	-1.15685	0.913305	24.3688	7.9545e-07	1.67602e-05	1.33559	1.4889	0.113096	1.1699	0.167044	0.248402
Solyc04g051730.1.1	IPR001128	101245248	cytochrome P450, family 96, subfamily A, polypeptide 10	-3.80268	2.03099	24.3477	8.04224e-07	1.69169e-05	3.80277	1.59391	-0.818589	2.48815	0.0262963	-4.4652
Solyc05g050210.3.1	IPR013830		GDSL-like Lipase/Acylhydrolase superfamily protein	-2.57325	-0.746114	24.3416	8.06766e-07	1.69562e-05	0.0439956	0.357284	-2.85513	-1.06092	-2.44613	-2.71413
Solyc03g078720.3.1	IPR002213		UDP-glucosyl transferase 85A5	1.32762	1.69451	24.2829	8.31739e-07	1.74375e-05	1.03729	0.258518	1.70858	1.07411	2.32738	2.36495
Solyc06g069727.1.1			atypical CYS HIS rich thioredoxin 4	-1.08507	1.09795	24.2747	8.35309e-07	1.74978e-05	1.58265	1.53182	0.553321	1.38478	0.335603	0.372964
Solyc01g104431.1.1				1.43418	0.668113	24.2514	8.45477e-07	1.76961e-05	0.0439956	-0.631982	0.750054	-0.380049	1.40784	1.15276
Solyc12g008600.2.1	IPR010410	101262285	Protein of unknown function (DUF1005)	1.01648	1.53043	24.2245	8.57339e-07	1.79295e-05	0.829746	1.00108	1.95185	0.861035	1.7135	2.05365
Solyc05g054450.1.1		101264825		1.02149	2.03692	24.2104	8.63666e-07	1.80391e-05	1.69194	1.00108	2.44764	1.44346	2.54078	2.29319
Solyc04g007920.1.1	IPR008417	101267398		-6.06256	-2.12034	24.2096	8.64007e-07	1.80391e-05	-0.83766	-1.92218	-6.7078	-2.69798	-6.7078	-6.7078
Solyc04g078340.3.1	IPR017972		cytochrome P450, family 81, subfamily K, polypeptide 2	-1.82811	-0.187897	24.1811	8.76885e-07	1.82928e-05	0.660791	0.206478	-0.818589	0.129126	-2.19569	-1.59541
Solyc10g075050.2.1	IPR000528		lipid transfer protein 12	-6.78245	-1.58935	24.1391	8.96203e-07	1.8665e-05	0.24866	-2.48122	-6.7078	-2.14319	-6.7078	-6.7078
Solyc09g011720.3.1	IPR021916	101262946	Protein of unknown function (DUF3527)	1.0455	1.61256	24.1139	9.08022e-07	1.888e-05	1.16915	0.618522	1.81789	1.02372	2.10044	2.06601
Solyc02g087910.2.1	IPR000528		Bifunctional inhibitor/lipid-transfer protein/seed storage 2S albumin superfamily protein	-2.20819	1.05465	24.0729	9.27579e-07	1.92075e-05	2.4619	1.59391	-0.136014	0.610942	-0.434214	-0.875227
Solyc06g033850.3.1	IPR001471		Integrase-type DNA-binding superfamily protein	-1.11659	2.76334	23.9901	9.68335e-07	1.99695e-05	3.09328	3.64036	1.96775	2.7585	2.18012	2.1144
Solyc07g052880.3.1	IPR015425		formin 3	-1.43495	0.99201	23.9257	1.00124e-06	2.05976e-05	1.48479	1.8528	-0.437305	1.07411	0.295273	0.204371
Solyc09g025310.3.1	IPR003441	101261358	NAC domain containing protein 74	-4.24143	-1.4587	23.8349	1.04963e-06	2.15755e-05	-0.0703665	-2.17479	-6.7078	-0.956059	-6.7078	-3.62629
Solyc08g036620.3.1	IPR010399	101252609	jasmonate-zim-domain protein 8	2.77594	-1.51251	23.8004	1.06859e-06	2.19118e-05	-2.97233	-3.40615	-0.932039	-6.7078	-1.00988	-1.19084
Solyc08g065600.1.1	IPR001096		gamma vacuolar processing enzyme	-4.1985	-2.08122	23.774	1.08336e-06	2.21787e-05	-1.17887	-1.92218	-4.25303	-1.92953	-6.7078	-6.7078
Solyc07g063850.3.1	IPR004993	101262636	Auxin-responsive GH3 family protein	-1.43662	0.865854	23.7002	1.12571e-06	2.29897e-05	1.77708	1.03131	-0.355881	1.1699	-0.129682	0.204371
Solyc03g059390.3.1	IPR018499	101258629	tetraspanin2	1.38177	0.279278	23.698	1.12697e-06	2.29968e-05	-0.330506	-1.20629	0.674548	-0.599451	0.747903	0.724282
Solyc01g111570.3.1	IPR014729	101265487	Protein kinase protein with adenine nucleotide alpha hydrolases-like domain	-1.21186	1.17394	23.5687	1.20533e-06	2.44975e-05	1.58265	1.32773	0.113096	1.87155	0.655342	0.372964
Solyc10g011750.3.1			Late embryogenesis abundant (LEA) hydroxyproline-rich glycoprotein family	1.07094	1.6388	23.3421	1.35602e-06	2.73393e-05	1.24284	0.618522	1.95185	0.971503	1.89987	2.23966
Solyc08g013680.3.1	IPR008162		pyrophosphorylase 5	1.15361	1.05836	23.2826	1.39859e-06	2.81301e-05	0.295591	0.308746	1.6107	0.349714	1.18316	1.58925
Solyc08g075950.2.1	IPR014978		growth-regulating factor 5	-2.18903	-0.187632	23.229	1.43809e-06	2.88555e-05	1.03729	0.15249	-1.33833	-0.189651	-1.63195	-2.41043
Solyc01g094460.3.1	IPR005175	101253830	AT hook motif DNA-binding family protein	-1.23127	0.919316	23.1393	1.50678e-06	3.00191e-05	1.09149	1.61402	0.275227	1.34429	0.253784	-0.148423
Solyc09g091380.1.1				-6.44771	-1.86189	23.0981	1.53944e-06	3.06214e-05	-0.480582	-1.07168	-6.7078	-3.6111	-6.7078	-6.7078
Solyc11g012360.2.1	IPR001898	101257524	tonoplast dicarboxylate transporter	1.00577	1.83282	23.0649	1.5662e-06	3.11047e-05	1.11784	1.53182	2.07441	0.944669	2.34724	2.20656
Solyc09g065100.2.1	IPR025610		basic helix-loop-helix (bHLH) DNA-binding superfamily protein	-6.33901	-1.93183	23.0348	1.59093e-06	3.1472e-05	-0.403593	-1.70728	-6.7078	-3.08347	-6.7078	-6.7078
Solyc10g008000.1.1	IPR006936	101246185	Protein of unknown function (DUF640)	-1.26033	1.16266	23.02	1.60322e-06	3.16655e-05	1.7266	1.42202	0.856383	1.68958	-0.0757937	0.204371
Solyc11g012640.1.1	IPR008470	101263778		1.34263	0.487441	22.9538	1.65942e-06	3.26733e-05	-0.131137	-0.453928	1.13514	-0.680684	0.969121	0.660532
Solyc08g080040.3.1	IPR005123		leucoanthocyanidin dioxygenase	-2.54238	1.27693	22.9466	1.66562e-06	3.27698e-05	2.93924	1.55282	-0.932039	0.677646	-0.653501	-0.0924281
Solyc04g054930.3.1	IPR003337		Haloacid dehalogenase-like hydrolase (HAD) superfamily protein	-1.03848	1.50558	22.8866	1.71845e-06	3.36738e-05	1.85748	2.14315	0.986964	1.68958	0.717705	0.900196
Solyc02g089750.4.1	IPR000719		Protein kinase superfamily protein	1.10172	1.93058	22.849	1.75239e-06	3.42633e-05	0.829746	1.46695	2.01443	1.36468	2.40523	2.55225
Solyc11g012310.1.1				2.63982	-1.41287	22.8179	1.78098e-06	3.47684e-05	-3.50413	-4.26679	-0.932039	-3.08347	-0.653501	-1.31351
Solyc08g074705.1.1				1.02083	3.18049	22.608	1.98655e-06	3.83955e-05	2.62696	2.11519	3.4689	2.85532	3.331	3.90063
Solyc07g055140.3.1	IPR007789		Protein of unknown function (DUF688)	-1.0894	1.43014	22.5789	2.01689e-06	3.88452e-05	1.63833	1.8528	0.553321	2.00741	1.06819	0.559291
Solyc05g007940.3.1	IPR033697	544193	ribonuclease 1	-1.40821	1.03639	22.5783	2.01752e-06	3.88452e-05	1.90366	1.14627	0.466445	1.44346	-0.367947	0.204371
Solyc03g080190.3.1	IPR005123	100736526	2-oxoglutarate (2OG) and Fe(II)-dependent oxygenase superfamily protein	1.20933	1.53552	22.4878	2.11483e-06	4.0626e-05	0.660791	1.03131	2.36599	0.610942	1.65095	1.85438
Solyc02g084280.3.1				1.36588	1.24975	22.3896	2.22575e-06	4.25782e-05	-0.0703665	0.357284	1.21726	0.677646	2.0407	1.76626
Solyc07g009530.1.1	IPR001002		basic chitinase	-1.56354	7.55541	22.376	2.2416e-06	4.28007e-05	8.1569	8.66603	7.07399	7.24651	6.19243	6.27666
Solyc07g006630.3.1	IPR010402		CONSTANS-like 5	1.12081	1.57552	22.361	2.25917e-06	4.31036e-05	0.624489	1.00108	2.26665	0.971503	1.63488	2.02862
Solyc10g006870.1.1	IPR000719	104649482	protein kinase family protein	1.25668	0.874997	22.2499	2.39372e-06	4.55329e-05	-0.403593	0.206478	1.21726	0.265482	1.55173	1.10566
Solyc03g117860.3.1	IPR031127		RING/U-box superfamily protein	-1.17101	0.854034	22.0869	2.60585e-06	4.94192e-05	1.42273	1.17363	0.466445	1.21552	-0.0757937	-0.0924281
Solyc02g078340.3.1	IPR011991		heat shock factor 4	-1.82579	-0.577183	22.023	2.69399e-06	5.09757e-05	0.149954	-0.295455	-2.85513	-0.131387	-1.98235	-1.31351
Solyc10g074745.1.1				-1.58787	-0.147119	21.9348	2.82075e-06	5.31354e-05	0.58725	0.308746	-0.818589	0.0806514	-1.22765	-1.76013
Solyc01g112070.3.1	IPR019378		O-fucosyltransferase family protein	1.33529	1.14179	21.932	2.8249e-06	5.31739e-05	-0.131137	0.357284	1.16304	0.504722	1.55173	1.96407
Solyc07g054860.1.1	IPR015421	101251901	Pyridoxal phosphate (PLP)-dependent transferases superfamily protein	-3.39468	0.622857	21.8143	3.00359e-06	5.62022e-05	1.87304	-0.631982	-1.90594	1.88572	-1.11466	-4.4652
Solyc04g055020.2.1	IPR017896	101253277	succinate dehydrogenase 2-3	-6.61242	-1.73385	21.751	3.10434e-06	5.79584e-05	-0.0120526	-1.52028	-6.7078	-3.6111	-6.7078	-6.7078
Solyc08g081740.3.1	IPR027417	101244308	P-loop containing nucleoside triphosphate hydrolases superfamily protein	-3.24412	-0.333743	21.7379	3.12563e-06	5.83127e-05	1.40143	-0.631982	-4.25303	-0.522549	-2.19569	-2.71413
Solyc10g049996.1.1				-1.32996	0.593899	21.6019	3.35515e-06	6.21355e-05	1.0094	1.25274	0.223182	0.889455	-0.734687	-0.397051
Solyc02g068670.2.1	IPR020683		Ankyrin repeat family protein	2.02392	-0.954836	21.2476	4.03605e-06	7.36113e-05	-2.58463	-3.40615	-0.278809	-1.92953	-0.734687	-0.466532
Solyc10g051080.1.1				1.95701	-0.74399	21.2028	4.1317e-06	7.5247e-05	-2.02753	-3.40615	-0.615387	-1.74347	-0.304592	0.0134357
Solyc03g044085.1.1	IPR017853		O-Glycosyl hydrolases family 17 protein	-5.79234	-2.29149	21.1809	4.17913e-06	7.60559e-05	-1.05595	-2.8708	-6.7078	-2.39408	-6.7078	-6.7078
Solyc10g008860.1.1	IPR002213	101255247	UDP-Glycosyltransferase superfamily protein	-5.47494	-2.485	21.1792	4.18276e-06	7.60672e-05	-2.02753	-2.8708	-6.7078	-1.92953	-6.7078	-6.7078
Solyc12g056820.2.1	IPR011706	101254671	Laccase/Diphenol oxidase family protein	-4.75271	-1.70459	21.1644	4.21532e-06	7.6494e-05	-0.131137	-1.70728	-6.7078	-2.39408	-6.7078	-4.4652
Solyc08g068970.3.1		101245866		-6.60998	-1.73405	21.0838	4.3963e-06	7.93787e-05	0.0439956	-1.70728	-6.7078	-3.6111	-6.7078	-6.7078
Solyc07g064860.2.1		101264953		-2.59174	-0.829006	20.9174	4.79518e-06	8.59659e-05	0.509757	-0.631982	-2.85513	-0.956059	-2.44613	-3.09929
Solyc04g009435.1.1	IPR003441		NAC (No Apical Meristem) domain transcriptional regulator superfamily protein	-1.38933	-0.0325677	20.7983	5.10276e-06	9.12208e-05	0.149954	0.493808	-1.05518	0.541005	-1.00988	-0.875227
Solyc04g051280.3.1				-1.26545	5.03457	20.7445	5.24829e-06	9.35575e-05	6.1624	5.17974	4.52042	4.9481	4.147	4.09402
Solyc08g065430.3.1	IPR004142	101262545	N-MYC downregulated-like 2	1.25779	0.546731	20.7242	5.30413e-06	9.43529e-05	-0.131137	-0.0862622	1.16304	-0.680684	0.717705	1.00658
Solyc01g100620.2.1	IPR001606		HMG (high mobility group) box protein with ARID/BRIGHT DNA-binding domain	-6.46381	-1.86083	20.5978	5.66597e-06	0.000100365	-0.73977	-0.631982	-6.7078	-4.4516	-6.7078	-6.7078
Solyc09g018840.3.1	IPR004326		Seven transmembrane MLO family protein	-1.1308	2.13566	20.5854	5.70282e-06	0.000100876	2.44117	2.9959	1.70858	2.18987	1.20509	1.40701
Solyc03g034030.3.1		101249151	late embryogenesis abundant domain-containing protein / LEA domain-containing protein	-4.3828	-1.35701	20.5252	5.88499e-06	0.000103808	0.341044	-1.20629	-4.25303	-2.39408	-4.4948	-6.7078
Solyc04g015530.2.1	IPR000743		Pectin lyase-like superfamily protein	-1.18416	0.94553	20.4821	6.01927e-06	0.000105954	1.44371	1.06092	0.553321	1.55412	-0.0757937	0.0635902
Solyc10g006920.3.1	IPR000644	101268619	Cystathionine beta-synthase (CBS) family protein	-5.38768	-2.53689	20.3814	6.34442e-06	0.000111212	-2.58463	-2.17479	-6.7078	-2.14319	-6.7078	-6.7078
Solyc08g006370.1.1	IPR002213		UDP-glucosyltransferase 74F2	-1.21672	1.46899	20.3781	6.35522e-06	0.000111324	1.65642	2.24984	1.1067	1.8134	0.717705	0.204371
Solyc10g085740.2.1	IPR013830		GDSL-like Lipase/Acylhydrolase family protein	-5.45668	-1.15879	20.3386	6.48777e-06	0.000113332	0.861286	-1.92218	-6.7078	-2.39408	-4.4948	-6.7078
Solyc04g080380.3.1	IPR011610		Leucine carboxyl methyltransferase	1.48688	0.228885	20.3163	6.56379e-06	0.000114422	-1.62663	-0.729991	0.95541	-0.313751	0.623119	0.487621
Solyc07g064210.2.1	IPR016140	101256608	seed storage albumin 5	-6.01398	-2.16037	20.3037	6.60741e-06	0.000115103	-0.83766	-1.70728	-6.7078	-3.6111	-6.7078	-6.7078
Solyc05g005350.2.1	IPR009072	101246137	nuclear factor Y, subunit B6	-6.56629	-1.76537	20.2907	6.65227e-06	0.000115725	0.0439956	-1.92218	-6.7078	-3.6111	-6.7078	-6.7078
Solyc01g105500.3.1	IPR003305		Glycosyl hydrolase family 10 protein	-5.68427	-0.997297	20.2227	6.89296e-06	0.000119829	0.58725	0.15249	-6.7078	-4.4516	-4.4948	-6.7078
Solyc09g090910.2.1	IPR000270	101055546	auxin-induced protein 13	-1.07048	1.21139	20.1953	6.99256e-06	0.000121477	1.52474	1.61402	-0.00608918	1.68958	0.806468	0.660532
Solyc01g109330.3.1	IPR007816	101262460	cytochrome c biogenesis protein family	-1.26592	1.24649	20.1761	7.0629e-06	0.00012253	1.96301	1.81854	0.712795	1.28134	0.623119	-0.0924281
Solyc04g064920.3.1	IPR014830		Glycolipid transfer protein (GLTP) family protein	-3.07796	-1.89859	20.149	7.16395e-06	0.000124198	-1.05595	-1.70728	-4.25303	-1.74347	-4.4948	-4.4652
Solyc01g081250.3.1	IPR004045		glutathione S-transferase tau 7	-4.36516	-1.96799	20.0319	7.61608e-06	0.000131405	-0.648101	-1.92218	-4.25303	-2.39408	-6.7078	-6.7078
Solyc12g087870.2.1	IPR030182		purine permease 3	-3.28962	-1.76501	19.9866	7.79871e-06	0.000134189	-1.17887	-0.729991	-4.25303	-2.14319	-6.7078	-3.62629
Solyc04g007320.2.1	IPR000157		disease resistance protein (TIR-NBS-LRR class), putative	1.03645	1.7964	19.9068	8.13112e-06	0.000139055	1.19413	1.06092	1.74594	1.19289	2.21296	2.48942
Solyc01g109040.3.1	IPR012595		cytochrome b6f complex subunit (petM), putative	1.04221	1.79757	19.8099	8.55383e-06	0.000145744	1.06464	1.4889	2.45893	0.861035	2.18012	1.91026
Solyc03g078090.3.1	IPR006501		Plant invertase/pectin methylesterase inhibitor superfamily	1.7348	-0.329227	19.8092	8.55685e-06	0.000145744	-1.31325	-1.35476	0.113096	-2.14319	-0.304592	0.523901
Solyc08g068660.1.1			Pyridoxal phosphate (PLP)-dependent transferases superfamily protein	-1.05864	0.94763	19.5487	9.80681e-06	0.000164809	1.42273	1.27817	0.553321	1.30263	-0.0757937	0.332626
Solyc10g085190.2.1	IPR026992	101246681	2-oxoglutarate (2OG) and Fe(II)-dependent oxygenase superfamily protein	-5.56486	-2.43354	19.5156	9.97825e-06	0.000167467	-1.31325	-2.8708	-6.7078	-2.69798	-6.7078	-6.7078
Solyc06g083040.3.1	IPR001563		serine carboxypeptidase-like 20	-5.5707	-2.43308	19.3375	1.09536e-05	0.000182502	-1.31325	-2.48122	-6.7078	-3.08347	-6.7078	-6.7078
Solyc03g082430.1.1	IPR014978		growth-regulating factor 7	-4.60826	-1.7972	19.1954	1.17997e-05	0.000195824	-0.260943	-1.70728	-4.25303	-2.69798	-6.7078	-6.7078
Solyc07g061800.3.1	IPR006917	101255514	SOUL heme-binding family protein	1.27202	0.440205	19.1872	1.18503e-05	0.000196534	0.0979475	-0.631982	0.986964	-0.858309	0.806468	0.785335
Solyc06g083590.3.1	IPR015300	778203	AP2/B3-like transcriptional factor family protein	-6.21634	-2.00567	19.1296	1.22135e-05	0.00020216	-0.330506	-3.40615	-6.7078	-2.39408	-6.7078	-6.7078
Solyc08g067000.3.1		101262136		2.81882	-1.48841	19.0765	1.25581e-05	0.00020732	-3.50413	-6.7078	-1.18982	-3.08347	-1.63195	-0.466532
Solyc10g007960.1.1	IPR001128	101247264	allene oxide synthase	-5.29271	-2.59093	19.0362	1.28264e-05	0.000211334	-2.27936	-2.17479	-6.7078	-2.69798	-6.7078	-6.7078
Solyc06g017860.2.1	IPR029058		serine carboxypeptidase-like 48	-3.4954	0.00998306	18.931	1.35535e-05	0.000221866	1.87304	-0.295455	-2.46527	-0.380049	-1.79654	-6.7078
Solyc04g005610.3.1	IPR003441	101248665	NAC-like, activated by AP3/PI	-1.03846	1.32645	18.9194	1.36359e-05	0.00022307	1.77708	1.90271	1.01784	1.4625	0.41303	0.593833
Solyc09g092590.2.1	IPR017972	101253132	cytochrome P450, family 83, subfamily B, polypeptide 1	-5.52318	-1.09906	18.8871	1.38685e-05	0.000226289	0.980972	-2.8708	-6.7078	-1.92953	-4.4948	-6.7078
Solyc02g063420.3.1		101250769	hydroxyproline-rich glycoprotein family protein	-1.06337	1.94752	18.8333	1.42656e-05	0.000232468	2.54193	2.47549	1.72738	2.03311	0.943254	1.15276
Solyc09g014740.3.1	IPR017441		wall-associated kinase 2	1.23471	0.386923	18.8163	1.43932e-05	0.000234396	-0.330506	-0.54021	1.1067	-0.44954	0.68686	0.559291
Solyc03g033410.3.1	IPR000608		ubiquitin-conjugating enzyme 28	1.28936	0.00870908	18.7983	1.45293e-05	0.000236156	-0.942679	-0.835146	0.466445	-0.858309	0.211066	0.523901
Solyc07g043240.3.1	IPR011050	101257682	Pectin lyase-like superfamily protein	-1.61953	-0.0517519	18.7852	1.463e-05	0.000237486	0.92237	-0.0862622	-1.18982	0.308213	-0.9122	-1.44759
Solyc12g088830.2.1	IPR008545		Plant protein of unknown function (DUF827)	-1.04772	1.11115	18.7696	1.47498e-05	0.000239123	1.5049	1.63386	0.594872	1.36468	0.68686	0.0134357
Solyc02g088987.1.1	IPR001878			1.25502	1.56794	18.7188	1.5148e-05	0.000244685	1.03729	0.357284	1.36867	0.802458	2.29706	2.19536
Solyc06g076290.1.1	IPR005202		GRAS family transcription factor	-1.27836	0.173101	18.7184	1.5151e-05	0.000244685	0.696202	0.578137	-0.205646	0.504722	-0.820715	-1.07779
Solyc02g093335.1.1	IPR007230		Nucleoporin autopeptidase	1.29862	1.20288	18.6792	1.54664e-05	0.000249299	0.696202	0.44972	1.1067	-0.189651	1.81683	1.89649
Solyc04g077830.2.1	IPR011990	101258948	no pollen germination related 1	-1.37699	-0.213099	18.6689	1.55497e-05	0.000250482	0.0439956	0.15249	-0.932039	0.390055	-1.22765	-1.31351
Solyc08g082670.3.1	IPR005150		cellulose synthase like G3	-2.64662	-1.31162	18.6393	1.57931e-05	0.000254241	-0.131137	-1.07168	-2.85513	-1.43082	-4.4948	-3.09929
Solyc06g084330.3.1	IPR027815	101250900	ERD (early-responsive to dehydration stress) family protein	-2.17051	-1.35992	18.6226	1.5932e-05	0.000256149	-0.648101	-0.948573	-3.391	-1.174	-2.44613	-3.62629
Solyc07g065460.1.1		101260954		1.36537	0.294847	18.6149	1.59965e-05	0.000256533	-0.648101	-0.453928	1.16304	-0.766764	0.486512	0.487621
Solyc09g011630.3.1	IPR004045		glutathione S-transferase TAU 8	-2.83481	-1.56228	18.5715	1.6365e-05	0.000261777	-0.561911	-1.07168	-6.7078	-1.74347	-4.4948	-2.71413
Solyc12g009870.2.1	IPR001611	101246800	Leucine-rich repeat family protein	-4.18576	-0.778669	18.5382	1.66533e-05	0.000265716	1.16915	-1.07168	-4.25303	-1.92953	-3.13381	-6.7078
Solyc02g088950.2.1				1.51638	0.865336	18.5239	1.67788e-05	0.000267381	-0.260943	-0.0227691	0.420964	-0.189651	1.7135	1.58925
Solyc01g009830.3.1	IPR004853	101265265	Nucleotide/sugar transporter family protein	1.03129	0.904426	18.5198	1.68147e-05	0.00026771	0.341044	0.206478	1.39243	0.176024	1.3695	1.032
Solyc07g048085.1.1	IPR000782		FASCICLIN-like arabinoogalactan 7	-1.08184	1.03078	18.5191	1.68207e-05	0.00026771	1.60145	1.30316	-0.00608918	1.36468	0.717705	0.204371
Solyc03g031470.3.1	IPR001509	101263493	NAD(P)-binding Rossmann-fold superfamily protein	-4.08756	-1.58957	18.5121	1.68827e-05	0.000268359	0.0439956	-1.92218	-6.7078	-2.14319	-4.4948	-4.4652
Solyc10g008540.3.1		101259084		-1.32944	-0.0422188	18.4192	1.77264e-05	0.000280885	0.624489	0.258518	-1.18982	0.221446	-0.734687	-0.972955
Solyc02g078040.3.1	IPR003882	101253856	Pollen Ole e 1 allergen and extensin family protein	-1.14426	2.62185	18.3458	1.84224e-05	0.000290396	2.99006	3.55969	2.17373	2.48815	1.68257	1.91026
Solyc06g005630.2.1	IPR013083		RING/U-box superfamily protein	-1.46479	0.427517	18.345	1.84302e-05	0.000290396	1.06464	1.20048	-1.33833	0.390055	-0.367947	-0.20668
Solyc02g077590.1.1	IPR000047		homeobox protein 52	-1.12781	1.2105	18.323	1.86446e-05	0.000293591	1.85748	1.65343	0.553321	1.34429	0.834883	0.0134357
Solyc07g056250.3.1	IPR029058	101249562	alpha/beta-Hydrolases superfamily protein	2.03918	-1.14366	18.2599	1.92721e-05	0.000302905	-3.50413	-2.8708	-0.355881	-2.14319	-0.9122	-0.875227
Solyc04g055250.3.1				1.19642	0.363825	18.2066	1.98196e-05	0.000310351	-0.131137	-0.631982	0.890153	-0.599451	0.521895	0.843908
Solyc06g034200.1.1	IPR020846	101249273	phosphate transporter 1;7	-1.52918	-0.406755	18.0896	2.10749e-05	0.000329319	-0.403593	0.308746	-1.5039	0.129126	-1.35025	-1.59541
Solyc01g079940.3.1	IPR032861	101253826	Eukaryotic aspartyl protease family protein	-1.30048	0.655739	17.9888	2.2221e-05	0.000346022	1.0094	1.44466	0.325459	0.832043	-0.367947	-0.616418
Solyc05g052950.3.1	IPR000408		Regulator of chromosome condensation (RCC1) family protein	1.56538	-0.297355	17.9203	2.30354e-05	0.000357163	-1.46145	-1.07168	-0.205646	-1.74347	-0.0238458	0.523901
Solyc11g005480.2.1	IPR013320	101265388		1.08569	0.771658	17.7703	2.49243e-05	0.000382222	0.200151	-0.295455	1.39243	0.221446	1.04405	1.00658
Solyc03g115005.1.1	IPR008797		PsbQ-like 3	5.31492	-2.54034	17.7609	2.50476e-05	0.000383881	-6.7078	-6.7078	-3.391	-6.7078	-1.79654	-2.41043
Solyc02g085770.3.1			AWPM-19-like family protein	-3.28617	-2.1221	17.6872	2.60371e-05	0.000397838	-1.46145	-2.48122	-4.25303	-1.57869	-4.4948	-6.7078
Solyc08g083230.2.1	IPR014978		growth-regulating factor 8	-4.43766	-1.89946	17.6723	2.62425e-05	0.000400734	-0.561911	-3.40615	-4.25303	-1.43082	-6.7078	-6.7078
Solyc02g071000.1.1	IPR001344		chlorophyll A/B binding protein 1	-1.53386	0.160258	17.592	2.73744e-05	0.000417261	0.385108	1.20048	-0.615387	0.221446	-0.820715	-1.19084
Solyc03g113510.2.1		101264914		-1.46095	1.03106	17.5847	2.74797e-05	0.000418614	2.17865	0.970203	0.169188	1.1699	-0.0238458	0.112059
Solyc04g008360.3.1	IPR004082		Protein of unknown function (DUF1423)	2.65342	-1.59498	17.559	2.78536e-05	0.000423276	-4.35547	-3.40615	-1.5039	-3.6111	-1.63195	-0.616418
Solyc06g074820.3.1	IPR023271	778315	gamma tonoplast intrinsic protein	-1.1572	1.48233	17.5446	2.80647e-05	0.000425983	1.69194	2.34918	0.95541	1.62344	0.943254	0.332626
Solyc09g011590.3.1	IPR010987		glutathione S-transferase tau 7	-1.61189	0.160835	17.524	2.83701e-05	0.000430124	1.03729	0.83963	-0.437305	-0.0214757	-1.48423	-0.972955
Solyc05g047710.3.1	IPR000008		Calcium-dependent lipid-binding (CaLB domain) family protein	-2.64441	-1.31182	17.5217	2.84053e-05	0.000430376	-0.0703665	-1.20629	-2.85513	-1.43082	-4.4948	-3.09929
Solyc06g083850.3.1	IPR003441		NAC domain containing protein 74	-2.23545	-1.59034	17.4565	2.93965e-05	0.000441946	-1.31325	-1.20629	-2.85513	-1.06092	-3.65943	-3.62629
Solyc06g016820.1.1				2.63806	-1.83591	17.4401	2.96509e-05	0.00044524	-3.50413	-6.7078	-1.69096	-3.6111	-1.35025	-1.44759
Solyc01g099163.1.1				-1.16233	0.386253	17.4038	3.02215e-05	0.000452462	0.696202	1.03131	-0.205646	0.610942	-0.243902	-0.697636
Solyc10g080960.1.1	IPR009057	101249222	Homeodomain-like superfamily protein	-1.26819	-0.0798748	17.3308	3.1405e-05	0.000467961	0.385108	0.357284	-1.05518	0.221446	-1.22765	-0.616418
Solyc06g007180.3.1	IPR006426	543875	glutamine-dependent asparagine synthase 1	-1.7191	0.992836	17.3182	3.16143e-05	0.000470524	2.20347	1.59391	-0.0695897	0.429299	-0.0238458	-0.330763
Solyc08g044270.3.1	IPR002932		NADH-dependent glutamate synthase 1	-5.63065	-2.38545	17.2926	3.20437e-05	0.000476073	-1.17887	-4.26679	-6.7078	-2.14319	-6.7078	-6.7078
Solyc02g092150.3.1	IPR002912		ACT domain repeat 1	-1.68746	0.436531	17.2109	3.3451e-05	0.000495813	0.829746	1.4889	-0.00608918	0.504722	-1.63195	-0.7837
Solyc12g006050.2.1	IPR020846	101253972	Major facilitator superfamily protein	1.88315	-0.462312	17.1944	3.37429e-05	0.000499846	-3.50413	-1.70728	0.169188	-1.174	-0.503671	0.332626
Solyc02g089740.3.1				1.74445	0.24933	17.1925	3.37776e-05	0.000500066	-1.62663	-1.70728	0.223182	-0.189651	0.747903	1.15276
Solyc08g082110.3.1	IPR003657		WRKY family transcription factor	-1.10335	1.82855	17.1714	3.41538e-05	0.000505339	2.00597	2.37298	0.63526	2.35182	0.916915	1.67241
Solyc12g055730.2.1	IPR029058		alpha/beta-Hydrolases superfamily protein	-2.55622	-1.22421	17.1365	3.47872e-05	0.000513303	-1.62663	-0.372517	-2.85513	-0.380049	-2.44613	-6.7078
Solyc02g085960.1.1				-5.67309	-2.38295	17.123	3.50356e-05	0.000516402	-1.31325	-1.70728	-6.7078	-4.4516	-6.7078	-6.7078
Solyc10g045500.2.1	IPR031116		Calcium-dependent phospholipid-binding Copine family protein	1.06196	1.45848	16.9999	3.73824e-05	0.000547018	0.797501	0.657807	2.27945	0.917326	1.69812	1.50101
Solyc01g005400.3.1	IPR007736	101245281	Caleosin-related family protein	-1.07125	2.41553	16.9867	3.76433e-05	0.000550198	3.1896	2.30036	2.14604	2.88386	1.51708	1.57203
Solyc03g033820.1.1	IPR003959		cytochrome BC1 synthesis	-5.18069	-2.64878	16.9811	3.77546e-05	0.000551187	-2.97233	-2.8708	-6.7078	-1.92953	-6.7078	-6.7078
Solyc08g078890.2.1	IPR016140		Bifunctional inhibitor/lipid-transfer protein/seed storage 2S albumin superfamily protein	-6.23	-2.00473	16.9521	3.83342e-05	0.000558679	-0.194581	-2.8708	-6.7078	-3.6111	-6.7078	-6.7078
Solyc02g078910.3.1	IPR003154	100037736	bifunctional nuclease i	-1.36383	0.569197	16.915	3.90906e-05	0.00056761	1.4644	0.938651	-0.932039	0.576397	-0.0238458	-0.20668
Solyc08g079870.3.1	IPR015500		Subtilase family protein	-1.12768	0.745187	16.8981	3.9441e-05	0.000571509	1.06464	1.35189	0.510537	1.02372	-0.243902	-0.267388
Solyc09g075350.3.1	IPR006501	101266668	Plant invertase/pectin methylesterase inhibitor superfamily	2.49152	-1.70965	16.8493	4.04682e-05	0.000584047	-6.7078	-4.26679	-1.18982	-2.69798	-1.22765	-1.59541
Solyc03g118930.2.1	IPR007657	101243978	Glycosyltransferase family 61 protein	-6.56424	-1.76553	16.7643	4.23231e-05	0.000608037	0.200151	-2.48122	-6.7078	-4.4516	-6.7078	-6.7078
Solyc07g009050.3.1	IPR003614		Arabidopsis defensin-like protein	1.19457	0.57416	16.7494	4.26557e-05	0.00061177	-0.403593	-0.729991	1.1904	0.265482	0.834883	0.900196
Solyc01g006610.2.1	IPR005123	101250832	2-oxoglutarate (2OG) and Fe(II)-dependent oxygenase superfamily protein	-5.18865	-2.64778	16.7222	4.32725e-05	0.000619208	-1.8132	-2.8708	-6.7078	-3.08347	-6.7078	-6.7078
Solyc09g011280.1.1	IPR006501		pectin methylesterase inhibitor 2	-5.18865	-2.64778	16.7222	4.32725e-05	0.000619208	-1.8132	-2.8708	-6.7078	-3.08347	-6.7078	-6.7078
Solyc04g076480.3.1	IPR017441	101247014	Protein kinase superfamily protein	-2.55391	-0.546626	16.6203	4.56604e-05	0.000650796	1.03729	-0.948573	-2.15867	-0.680684	-2.44613	-2.71413
Solyc08g006470.3.1	IPR007087		Zinc finger protein 622	-1.02452	0.881423	16.5712	4.68582e-05	0.000665987	1.09149	1.51052	-0.0695897	1.14654	0.450238	0.248402
Solyc01g098527.1.1	IPR017926		CTP synthase family protein	1.74594	-0.124274	16.5608	4.71151e-05	0.000669262	-0.942679	-2.17479	-0.5236	-1.2967	0.717705	0.559291
Solyc09g098510.3.1	IPR006706			-1.19117	3.24623	16.5517	4.73427e-05	0.00067174	3.86633	4.11985	2.04473	2.91183	2.72664	2.70226
Solyc04g014750.1.1				-5.5889	-2.43216	16.5474	4.74493e-05	0.000672496	-1.31325	-1.92218	-6.7078	-4.4516	-6.7078	-6.7078
Solyc06g054540.3.1	IPR008913	101266831	CHY-type/CTCHY-type/RING-type Zinc finger protein	-1.53472	-0.767929	16.2967	5.41592e-05	0.000759914	-0.561911	-0.372517	-2.15867	-0.189651	-1.98235	-1.59541
Solyc03g115025.1.1			mitochondrial import receptor subunit TOM5 homolog	-5.07663	-2.70659	16.2565	5.53186e-05	0.000774344	-2.97233	-2.17479	-6.7078	-2.69798	-6.7078	-6.7078
Solyc06g053780.3.1	IPR027329		TPX2 (targeting protein for Xklp2) protein family	-1.03698	0.451622	16.1708	5.78802e-05	0.00080557	0.980972	0.696051	-0.278809	0.741401	-0.129682	-0.267388
Solyc07g044970.1.1	IPR027417			-4.61304	-1.15961	16.1615	5.81656e-05	0.000808489	0.861286	-2.8708	-4.25303	-1.92953	-4.4948	-6.7078
Solyc09g083190.3.1		101266364	NAD(P)H dehydrogenase 18	1.00749	0.921756	16.133	5.90466e-05	0.000818482	-0.0120526	0.493808	1.24362	0.308213	1.49944	1.05697
Solyc11g005760.2.1	IPR030519		plant glycogenin-like starch initiation protein 1	-1.43047	0.602042	16.0969	6.01811e-05	0.000832379	1.11784	1.57351	-0.205646	0.390055	-0.0757937	-0.7837
Solyc08g077100.3.1	IPR013083	101264748	RING/U-box superfamily protein	-3.15911	-2.20432	16.0956	6.02251e-05	0.000832532	-1.46145	-2.17479	-6.7078	-2.14319	-4.4948	-4.4652
Solyc07g008440.3.1	IPR030182	101252698	purine permease 3	-2.80273	-1.80011	16.025	6.25113e-05	0.000862246	-0.83766	-2.17479	-4.25303	-1.43082	-3.13381	-6.7078
Solyc03g098290.3.1	IPR000368		sucrose synthase 6	-1.05527	1.3324	15.9525	6.49523e-05	0.000892017	2.02001	1.53182	0.374002	1.58919	0.41303	1.10566
Solyc07g042230.1.1	IPR001471	101246841	Integrase-type DNA-binding superfamily protein	-1.57839	0.621389	15.9488	6.50802e-05	0.000893287	1.84176	0.733307	-0.437305	0.504722	-0.653501	-0.20668
Solyc06g070950.2.1	IPR027417		ABC2 homolog 6	-4.4491	-1.93166	15.9254	6.58875e-05	0.000902895	-0.480582	-1.52028	-6.7078	-3.6111	-6.7078	-4.4652
Solyc04g082000.3.1	IPR000008		phospholipase D delta	-5.07596	-2.70677	15.9223	6.59955e-05	0.000903885	-2.02753	-2.8708	-6.7078	-3.08347	-6.7078	-6.7078
Solyc04g008060.3.1	IPR008217	101263898	vacuolar iron transporter 1	-1.62783	-0.763997	15.8177	6.97452e-05	0.000949881	-0.0703665	-0.222301	-1.5039	-0.766764	-2.44613	-1.94612
Solyc01g009370.2.1	IPR017972	101247849	cytochrome P450, family 98, subfamily A, polypeptide 3	-5.08376	-1.45657	15.7869	7.0891e-05	0.000963095	0.549024	-2.8708	-6.7078	-2.69798	-4.4948	-6.7078
Solyc02g080530.3.1	IPR010255	101253648	Peroxidase superfamily protein	-1.17935	1.72019	15.7508	7.22561e-05	0.000980058	2.28713	2.58144	1.1904	1.44346	0.747903	1.032
Solyc06g060410.3.1	IPR003409	101258867	Histone H3 K4-specific methyltransferase SET7/9 family protein	1.35339	-0.019307	15.7286	7.3111e-05	0.000989527	-1.17887	-1.07168	0.466445	-0.680684	-0.0757937	0.692759
Solyc08g080150.1.1	IPR005333	100736547	TCP family transcription factor	1.45568	-0.244774	15.7208	7.34133e-05	0.000992022	-1.05595	-1.70728	-0.355881	-1.174	0.167044	0.523901
Solyc11g032060.3.1	IPR001087		GDSL-like Lipase/Acylhydrolase superfamily protein	-2.3126	-1.7068	15.6676	7.55082e-05	0.00101761	-0.942679	-1.70728	-4.25303	-1.43082	-3.65943	-3.09929
Solyc03g070390.3.1	IPR029044	101260112	reversibly glycosylated polypeptide 1	1.19639	0.306589	15.5603	7.99134e-05	0.00106955	-0.403593	-0.948573	1.01784	-0.250367	0.41303	0.627568
Solyc01g111640.3.1	IPR016072		S phase kinase-associated protein 1	-3.13819	-0.102536	15.4968	8.26459e-05	0.00110145	1.79352	-0.0227691	-2.46527	-1.74347	-1.98235	-3.09929
Solyc09g089620.1.1	IPR005175	101268318	AT-hook motif nuclear-localized protein 20	-1.23633	0.114735	15.4867	8.30887e-05	0.00110677	0.660791	0.618522	-0.437305	0.265482	-1.35025	-0.466532
Solyc04g080820.2.1	IPR016167		cytokinin oxidase 5	-5.31013	-2.59018	15.3966	8.7147e-05	0.00115716	-1.62663	-2.17479	-6.7078	-4.4516	-6.7078	-6.7078
Solyc12g019700.1.1				1.15551	0.498594	15.3132	9.10768e-05	0.00120427	-0.561911	-0.295455	0.466445	-0.0214757	1.18316	0.872326
Solyc03g071570.3.1	IPR002022	101260911	Pectin lyase-like superfamily protein	1.11812	0.161583	15.2933	9.20444e-05	0.00121452	-0.330506	-0.835146	0.325459	-0.680684	0.556432	0.627568
Solyc09g091870.1.1	IPR000103	101245887	Flavin-containing monooxygenase family protein	-6.53416	-1.79647	15.2682	9.32747e-05	0.00122947	0.0439956	-1.70728	-6.7078	-6.7078	-6.7078	-6.7078
Solyc01g010770.3.1	IPR001107	101250039	SPFH/Band 7/PHB domain-containing membrane-associated protein family	-1.01396	0.801173	15.2426	9.45451e-05	0.00124362	1.09149	1.17363	0.553321	1.23779	0.167044	-0.330763
Solyc07g005190.3.1	IPR029058		alpha/beta-Hydrolases superfamily protein	-4.10745	-2.16053	15.2342	9.49668e-05	0.00124852	-1.05595	-1.52028	-6.7078	-3.6111	-4.4948	-6.7078
Solyc03g026330.3.1				1.11273	0.262059	15.2318	9.50899e-05	0.00124948	-0.648101	-0.222301	0.856383	-0.599451	0.590161	0.412204
Solyc11g043115.1.1				-4.12488	-2.12097	15.2263	9.53664e-05	0.0012523	-0.73977	-2.8708	-4.25303	-2.39408	-6.7078	-6.7078
Solyc01g060070.3.1	IPR003397	101260856	Mitochondrial import inner membrane translocase subunit Tim17/Tim22/Tim23 family protein	-1.35717	1.65892	15.2208	9.56463e-05	0.00125484	2.86339	1.67273	0.821803	1.55412	0.806468	0.785335
Solyc02g067340.3.1	IPR009057	544119	myb domain protein 94	1.0789	0.876413	15.2106	9.61647e-05	0.00126098	0.24866	-0.54021	1.36867	0.576397	1.28964	1.10566
Solyc03g063370.3.1			Tetratricopeptide repeat (TPR)-like superfamily protein	-1.15183	-0.0620908	15.2027	9.65668e-05	0.0012656	0.427865	0.206478	-1.05518	0.265482	-0.734687	-0.7837
Solyc01g091850.3.1	IPR008217	101265169	vacuolar iron transporter 1	-2.86099	-1.76679	15.1542	9.90791e-05	0.00129664	-0.561911	-1.70728	-4.25303	-2.14319	-4.4948	-3.62629
Solyc11g007500.2.1	IPR002213		UDP-Glycosyltransferase superfamily protein	-2.91656	-2.0037	15.1024	0.000101833	0.00132978	-1.62663	-1.07168	-3.391	-2.39408	-4.4948	-6.7078
Solyc10g006800.3.1	IPR000595		cyclic nucleotide-gated cation channel 4	-3.78428	-2.33714	15.0978	0.000102082	0.00133235	-1.31325	-2.8708	-4.25303	-2.39408	-6.7078	-6.7078
Solyc01g090760.3.1	IPR013088	101267350	GATA transcription factor 2	-5.07417	-2.70698	15.0849	0.000102784	0.00134081	-1.8132	-3.40615	-6.7078	-3.08347	-6.7078	-6.7078
Solyc01g104380.3.1	IPR008972	543646	plantacyanin	-5.80001	-2.29096	15.0717	0.000103502	0.00134949	-0.648101	-3.40615	-6.7078	-3.6111	-6.7078	-6.7078
Solyc02g086180.3.1	IPR006694	101264777	sterol 1	-3.08136	-2.24741	15.0629	0.000103988	0.00135511	-1.62663	-2.48122	-4.25303	-1.92953	-4.4948	-6.7078
Solyc12g096860.2.1	IPR029069		Thioesterase/thiol ester dehydrase-isomerase superfamily protein	1.83662	-0.830794	15.0612	0.00010408	0.00135562	-1.8132	-1.92218	0.169188	-3.08347	-0.653501	-0.7837
Solyc03g119210.1.1	IPR033872	101262798	Bifunctional inhibitor/lipid-transfer protein/seed storage 2S albumin superfamily protein	1.46729	-0.293582	15.0488	0.000104769	0.00136178	-2.02753	-1.52028	0.466445	-0.766764	-0.185662	0.0635902
Solyc12g100250.2.1	IPR005804		fatty acid desaturase 2	-1.1807	1.16289	14.9608	0.000109767	0.00141799	1.70937	2.01286	0.374002	0.889455	0.486512	0.412204
Solyc03g114440.1.1	IPR016177	101245636	related to AP2 11	-2.35116	-1.8654	14.9424	0.000110845	0.00142972	-1.62663	-1.70728	-3.391	-1.2967	-3.65943	-4.4652
Solyc12g044950.2.1	IPR005804		fatty acid desaturase 2	-2.31828	-1.70448	14.9107	0.000112724	0.00145172	-1.17887	-0.948573	-3.391	-1.92953	-4.4948	-3.09929
Solyc11g073110.2.1	IPR010369	101267866	Domain of unknown function (DUF966)	1.89834	-0.938986	14.8831	0.000114386	0.00147088	-2.27936	-2.17479	-0.932039	-2.69798	-0.9122	0.0635902
Solyc09g090620.1.1	IPR011598		NB-ARC domain-containing disease resistance protein	1.17801	-0.000842383	14.8709	0.000115127	0.00147966	-0.73977	-0.835146	0.420964	-0.858309	0.556432	0.0635902
Solyc03g097380.3.1	IPR006121		Heavy metal transport/detoxification superfamily protein	-1.52572	0.519895	14.8458	0.00011667	0.00149644	1.58265	1.06092	-0.136014	0.129126	-0.820715	-0.539529
Solyc01g067120.3.1	IPR001373		cullin 1	-5.08844	-2.70592	14.8219	0.000118153	0.00151162	-3.50413	-1.70728	-6.7078	-3.08347	-6.7078	-6.7078
Solyc09g098265.1.1				-1.30867	-0.333121	14.8106	0.000118867	0.00151844	-0.131137	0.308746	-0.818589	-0.0214757	-1.35025	-1.59541
Solyc10g008030.3.1	IPR025846	101245295	TRICHOME BIREFRINGENCE-LIKE 38	-4.95096	-2.76872	14.793	0.000119977	0.00152953	-2.27936	-3.40615	-6.7078	-2.69798	-6.7078	-6.7078
Solyc11g072620.1.1				-2.81404	-0.557639	14.789	0.000120236	0.00153206	1.11784	-0.372517	-2.85513	-1.57869	-3.65943	-1.94612
Solyc02g093890.1.1		104645665		-1.15114	0.363786	14.7825	0.000120649	0.00153576	1.03729	0.536588	-0.00608918	0.64468	-0.367947	-0.875227
Solyc10g054900.2.1			proline-rich protein 4	-2.45579	2.07562	14.7634	0.000121875	0.00154981	3.86244	2.40797	0.821803	0.541005	-0.0757937	0.248402
Solyc08g079730.1.1	IPR002528	101258088	MATE efflux family protein	-1.34833	0.738351	14.7385	0.000123501	0.00156615	1.31295	1.65343	0.223182	0.467504	-0.129682	-0.539529
Solyc06g074070.3.1	IPR013320	101256887	Leucine-rich repeat protein kinase family protein	-1.72423	-1.22475	14.738	0.000123532	0.00156615	-1.05595	-0.729991	-2.46527	-0.766764	-2.19569	-3.09929
Solyc01g066040.2.1				1.0306	1.38465	14.7262	0.00012431	0.00157443	0.829746	0.618522	2.2407	0.772252	1.46349	1.50101
Solyc01g112230.3.1	IPR000316		Plant EC metallothionein-like protein, family 15	-1.48519	3.02005	14.624	0.000131231	0.00165544	4.37517	3.25481	2.15995	2.44092	2.0407	2.06601
Solyc04g072700.3.1	IPR006121		Heavy metal transport/detoxification superfamily protein	-3.72137	-2.38415	14.5978	0.000133067	0.00167441	-1.46145	-2.17479	-6.7078	-3.08347	-6.7078	-4.4652
Solyc12g042590.2.1	IPR003657		WRKY DNA-binding protein 40	2.512	-1.68232	14.5565	0.000136018	0.00170899	-4.35547	-3.40615	-2.15867	-3.6111	-0.734687	-1.44759
Solyc02g091990.3.1	IPR004838	778292	1-amino-cyclopropane-1-carboxylate synthase 8	1.17794	0.777923	14.554	0.000136201	0.0017096	-0.131137	0.15249	0.510537	-0.0214757	1.26896	1.53696
Solyc11g032090.2.1				-1.79029	-1.00424	14.5047	0.000139814	0.00174792	-0.194581	-0.948573	-1.69096	-0.680684	-2.19569	-3.62629
Solyc11g010940.2.1	IPR003851	101252737	Dof-type zinc finger DNA-binding family protein	-5.09077	-2.70584	14.5038	0.000139878	0.00174792	-2.02753	-2.17479	-6.7078	-4.4516	-6.7078	-6.7078
Solyc11g011310.2.1	IPR029413		Rhamnogalacturonate lyase family protein	-5.20259	-2.64707	14.4835	0.00014139	0.0017642	-1.62663	-2.48122	-6.7078	-4.4516	-6.7078	-6.7078
Solyc06g063300.3.1				-1.02548	2.45135	14.344	0.000152262	0.00188679	3.33148	2.70848	1.81789	2.38213	1.46349	2.14965
Solyc10g078770.2.1	IPR005513	101253038	Late Embryogenesis Abundant 4-5	-1.19071	6.89894	14.318	0.000154386	0.00191123	8.05254	7.03167	6.5592	6.66502	5.98226	5.92134
Solyc01g044565.1.1			cytochrome P450, family 94, subfamily C, polypeptide 1	-4.95702	-2.76801	14.2997	0.000155893	0.001928	-2.02753	-2.8708	-6.7078	-3.6111	-6.7078	-6.7078
Solyc01g100880.3.1	IPR000620	101256713	nodulin MtN21 /EamA-like transporter family protein	-1.04734	1.6897	14.2943	0.000156337	0.0019316	2.48233	2.14315	1.31994	1.51817	1.0195	0.785335
Solyc05g007830.3.1	IPR009009	543795	expansin A1	-3.01222	-2.2913	14.2568	0.000159483	0.00196566	-2.02753	-1.70728	-6.7078	-2.39408	-4.4948	-4.4652
Solyc04g005410.2.1	IPR009834		ureide permease 2	-4.94513	-2.76919	14.1858	0.000165616	0.0020333	-2.27936	-4.26679	-6.7078	-2.39408	-6.7078	-6.7078
Solyc11g018760.1.1				1.06925	0.759489	14.1613	0.000167787	0.00205796	0.295591	0.15249	0.674548	-0.313751	1.3695	1.22064
Solyc01g107430.2.1	IPR007087		zinc finger protein 7	1.18001	-0.16527	14.1589	0.000168003	0.0020596	-1.17887	-1.07168	0.325459	-0.766764	-0.0238458	0.248402
Solyc08g077410.3.1	IPR003213		Cytochrome c oxidase, subunit Vib family protein	-1.53724	0.222822	14.0211	0.000180773	0.00218852	1.35787	0.578137	-0.713414	-0.131387	-0.734687	-0.972955
Solyc09g089820.2.1	IPR026992		2-oxoglutarate (2OG) and Fe(II)-dependent oxygenase superfamily protein	-3.89244	-1.70616	14.016	0.000181259	0.00219336	-0.0703665	-3.40615	-4.25303	-1.74347	-4.4948	-6.7078
Solyc04g079830.2.1	IPR006563		BEL1-like homeodomain 2	-1.23386	-0.349817	13.9429	0.00018845	0.00227166	-0.131137	-0.0227691	-1.69096	0.176024	-1.11466	-0.972955
Solyc09g091670.3.1	IPR029481		pleiotropic drug resistance 12	-1.33703	0.247362	13.9249	0.000190263	0.00228914	0.624489	1.20048	-0.713414	0.0806514	-0.367947	-0.875227
Solyc07g017823.1.1				4.9005	-2.76891	13.9223	0.000190523	0.00229118	-6.7078	-6.7078	-2.15867	-6.7078	-3.13381	-3.09929
Solyc08g044460.1.1				-1.83056	-1.45897	13.9149	0.000191278	0.00229806	-1.31325	-1.07168	-3.391	-0.956059	-2.74938	-2.71413
Solyc04g007570.2.1	IPR013830	101261405	GDSL-motif lipase/hydrolase 6	-5.07795	-2.70673	13.8905	0.000193773	0.00232141	-1.62663	-3.40615	-6.7078	-3.6111	-6.7078	-6.7078
Solyc11g032050.2.1	IPR001087	101249518	GDSL-like Lipase/Acylhydrolase superfamily protein	-5.07795	-2.70673	13.8905	0.000193773	0.00232141	-1.62663	-3.40615	-6.7078	-3.6111	-6.7078	-6.7078
Solyc10g006740.3.1	IPR002048		Calcium-binding EF-hand family protein	-2.35082	-1.8664	13.8698	0.000195917	0.00234154	-1.31325	-2.17479	-4.25303	-1.2967	-3.13381	-4.4652
Solyc08g079190.1.1	IPR027923	101245083	Bifunctional inhibitor/lipid-transfer protein/seed storage 2S albumin superfamily protein	-2.5397	-1.11455	13.7833	0.000205156	0.00243926	-1.31325	0.404242	-2.46527	-1.43082	-3.13381	-3.62629
Solyc03g006320.1.1	IPR001471	101257043	ethylene responsive element binding factor 4	-1.03229	1.21706	13.7463	0.000209236	0.00247959	2.02001	1.53182	0.821803	1.14654	0.41303	0.487621
Solyc08g007500.3.1		101267830		2.27411	-1.51096	13.7193	0.000212264	0.00250841	-4.35547	-4.26679	-0.5236	-2.39408	-1.63195	-1.31351
Solyc01g016400.1.1				-1.8943	-1.53629	13.7077	0.000213574	0.00252036	-1.46145	-0.948573	-3.391	-1.174	-2.74938	-3.09929
Solyc04g051360.3.1	IPR001471	101263697	Integrase-type DNA-binding superfamily protein	1.27011	-0.501693	13.6708	0.000217819	0.00256326	-1.62663	-1.52028	-0.205646	-1.174	-0.0238458	-0.267388
Solyc01g081620.3.1	IPR009291	101265960	Plant protein of unknown function (DUF946)	-1.4986	-0.621064	13.636	0.000221895	0.00260273	-0.131137	-0.835146	-1.90594	0.129126	-1.35025	-1.94612
Solyc03g071690.3.1	IPR000971		haemoglobin 2	-1.32077	-0.241916	13.5997	0.000226225	0.00264982	0.427865	0.096403	-0.5236	-0.0753848	-1.63195	-1.44759
Solyc11g011100.1.1				-1.42388	-0.391834	13.5567	0.000231467	0.00270495	0.0439956	0.44972	-1.33833	-0.522549	-1.11466	-1.76013
Solyc03g006120.3.1	IPR025422			-4.04417	-1.61903	13.553	0.000231917	0.00270895	0.0979475	-3.40615	-6.7078	-1.74347	-3.65943	-6.7078
Solyc01g109610.3.1			Erythronate-4-phosphate dehydrogenase family protein	-4.81621	-2.8332	13.4972	0.00023892	0.00278026	-2.97233	-3.40615	-6.7078	-2.39408	-6.7078	-6.7078
Solyc05g021163.1.1				-4.95565	-2.76822	13.4685	0.000242599	0.00281679	-1.8132	-3.40615	-6.7078	-3.6111	-6.7078	-6.7078
Solyc09g090970.3.1	IPR000916		MLP-like protein 423	-1.5541	3.89903	13.4385	0.000246515	0.00285438	5.33607	3.22242	2.56728	4.06525	3.16746	2.94902
Solyc03g094020.3.1	IPR011013	101246408	Glycosyl hydrolases family 31 protein	-3.04523	-1.64389	13.4368	0.000246735	0.00285561	-2.58463	-0.222301	-3.391	-1.43082	-6.7078	-3.62629
Solyc06g054270.3.1	IPR003663	101261239	Major facilitator superfamily protein	-1.52263	-0.968273	13.4178	0.000249254	0.00288064	-0.403593	-0.453928	-2.46527	-0.956059	-1.79654	-2.15967
Solyc02g084190.2.1				1.79694	-1.29713	13.3356	0.000260419	0.00299203	-2.58463	-3.40615	-1.5039	-2.39408	-0.820715	-0.697636
Solyc01g068380.3.1	IPR004843		purple acid phosphatase 27	-1.57975	0.0192756	13.3359	0.000260377	0.00299203	1.03729	0.657807	-1.05518	-0.522549	-0.820715	-1.31351
Solyc02g062560.3.1	IPR009215	100134884		-2.25624	-1.73621	13.2711	0.000269535	0.00307716	-0.83766	-1.92218	-2.85513	-1.57869	-3.65943	-4.4652
Solyc02g067310.3.1	IPR009057		homeobox protein 34	-3.92145	-1.70372	13.2128	0.000278037	0.00316136	-0.0120526	-1.70728	-4.25303	-3.6111	-4.4948	-6.7078
Solyc12g009015.1.1				-2.67182	-1.89703	13.2072	0.000278869	0.00316939	-2.02753	-0.729991	-4.25303	-2.14319	-3.65943	-4.4652
Solyc05g015370.2.1	IPR003511		DNA-binding HORMA family protein	1.23732	-0.310254	13.2063	0.000279006	0.00316952	-1.17887	-1.52028	-0.355881	-0.956059	0.167044	0.204371
Solyc11g009020.2.1	IPR006439	101258426	Haloacid dehalogenase-like hydrolase (HAD) superfamily protein	1.0536	0.367562	13.1996	0.000280014	0.0031781	-0.942679	-0.0227691	0.510537	-0.189651	0.717705	0.872326
Solyc07g062990.2.1				-4.9485	-2.76868	13.1887	0.000281635	0.0031922	-1.8132	-4.26679	-6.7078	-3.08347	-6.7078	-6.7078
Solyc08g077910.3.1	IPR009009	101247353	expansin-like B1	-2.86242	1.31177	13.1366	0.000289587	0.0032662	0.660791	3.42955	-0.205646	-0.189651	-0.9122	-1.19084
Solyc01g107460.2.1				2.89749	-2.29329	13.067	0.00030055	0.00337777	-6.7078	-4.26679	-1.90594	-4.4516	-2.44613	-1.94612
Solyc08g006280.2.1	IPR003340		Transcriptional factor B3 family protein	-2.92872	-2.33659	13.038	0.000305231	0.00342733	-2.27936	-1.70728	-4.25303	-2.39408	-6.7078	-4.4652
Solyc05g008640.1.1	IPR001841	101266940	RING-H2 finger A2A	-1.43451	-0.415064	13.0328	0.000306077	0.0034353	0.295591	0.15249	-0.818589	-0.522549	-1.98235	-1.59541
Solyc08g082630.3.1	IPR003340		auxin response factor 18	-2.92837	-1.73423	13.0226	0.000307748	0.00345252	-0.561911	-1.07168	-4.25303	-3.08347	-3.65943	-4.4652
Solyc07g032380.3.1				1.02604	0.971641	13.0078	0.0003102	0.00347539	0.0439956	0.873398	1.52731	-0.131387	1.20509	1.28548
Solyc00g011160.2.1				1.25785	2.14189	12.9867	0.000313719	0.00351015	1.5636	1.25274	2.35394	1.21552	1.7587	3.29178
Solyc01g096250.2.1		101260869		1.27494	-0.501006	12.9818	0.000314539	0.0035162	-2.02753	-1.52028	-0.0695897	-0.956059	-0.185662	-0.20668
Solyc10g085080.2.1				-1.73964	-1.4083	12.9367	0.000322204	0.00359394	-1.05595	-0.948573	-2.85513	-1.174	-2.19569	-3.62629
Solyc06g072620.3.1	IPR004316		Nodulin MtN3 family protein	-1.22256	-0.314289	12.9155	0.000325868	0.00362999	0.295591	-0.372517	-1.18982	0.129126	-1.35025	-0.972955
Solyc03g098010.3.1	IPR024927	101249252	purple acid phosphatase 17	-2.20303	-1.76801	12.9078	0.000327218	0.00364182	-1.05595	-2.17479	-2.85513	-1.2967	-3.65943	-4.4652
Solyc03g117690.3.1	IPR001461		Eukaryotic aspartyl protease family protein	-1.13227	-0.202555	12.8619	0.000335342	0.00372075	0.200151	0.308746	-1.33833	-0.0753848	-0.820715	-0.875227
Solyc03g019790.3.1	IPR017853	778277	alpha-galactosidase 2	-1.1776	2.52697	12.8425	0.000338839	0.00375232	3.69312	2.52943	1.78237	2.34157	1.66685	1.96407
Solyc02g081220.2.1	IPR006094		FAD-binding Berberine family protein	-4.3431	-1.96858	12.8325	0.000340645	0.00376964	-0.260943	-3.40615	-4.25303	-2.69798	-6.7078	-6.7078
Solyc02g071420.3.1	IPR000195		Ypt/Rab-GAP domain of gyp1p superfamily protein	-5.30121	-2.59082	12.7384	0.000358233	0.00394009	-1.17887	-3.40615	-6.7078	-4.4516	-6.7078	-6.7078
Solyc09g082930.1.1				-4.81615	-2.83291	12.6308	0.000379448	0.00414163	-2.02753	-4.26679	-6.7078	-3.08347	-6.7078	-6.7078
Solyc10g085890.1.1				1.32427	-0.769955	12.6277	0.00038007	0.00414595	-1.62663	-1.70728	-0.278809	-1.92953	-0.503671	-0.539529
Solyc06g074420.1.1	IPR002401		cytochrome P450, family 94, subfamily C, polypeptide 1	2.31629	-1.62457	12.6085	0.000384002	0.00418596	-3.50413	-4.26679	-2.15867	-3.08347	-1.48423	-0.616418
Solyc02g088980.2.1				1.76099	-0.601263	12.568	0.000392412	0.00427135	-2.97233	-2.48122	-0.932039	-1.06092	0.0747541	0.112059
Solyc05g005360.2.1	IPR009072		nuclear factor Y, subunit B6	-5.19686	-2.64749	12.5463	0.000397002	0.00431683	-1.31325	-3.40615	-6.7078	-4.4516	-6.7078	-6.7078
Solyc09g075750.1.1		101258780		2.40886	-1.97342	12.5222	0.000402145	0.00436038	-4.35547	-3.40615	-2.46527	-4.4516	-1.63195	-1.31351
Solyc09g082350.1.1	IPR014710		cupin family protein	-5.32253	-2.58993	12.5113	0.000404507	0.00438222	-1.46145	-2.17479	-6.7078	-6.7078	-6.7078	-6.7078
Solyc05g053890.2.1	IPR002213		UDP-Glycosyltransferase superfamily protein	1.23242	-0.100358	12.485	0.000410236	0.00443667	-0.83766	-0.948573	0.750054	-1.06092	-0.0238458	0.0134357
Solyc10g076250.2.1	IPR015421	101268729	PYRIMIDINE 4	-1.23916	0.971382	12.4021	0.000428847	0.00461619	1.76045	1.72915	-0.00608918	0.467504	0.211066	0.332626
Solyc01g095520.3.1	IPR009424	109119991	arabinogalactan protein 16	-2.18102	-1.96958	12.4007	0.000429178	0.00461778	-1.8132	-1.52028	-4.25303	-1.74347	-3.65943	-3.62629
Solyc03g094120.3.1	IPR005069	101249340	Nucleotide-diphospho-sugar transferase family protein	-1.70032	-1.33555	12.3629	0.000437957	0.00469821	-0.942679	-0.631982	-2.85513	-1.43082	-2.74938	-2.41043
Solyc05g009230.2.1	IPR001005	101244584	myb domain protein 62	-1.42873	-0.831765	12.3451	0.000442148	0.00473915	-0.131137	-0.948573	-1.69096	-0.44954	-1.79654	-2.15967
Solyc07g008930.1.1	IPR025322			-1.35594	-0.880606	12.3432	0.000442592	0.0047419	-0.403593	-0.453928	-1.90594	-0.766764	-1.98235	-1.76013
Solyc02g084160.2.1			cullin-associated and neddylation dissociated	1.19529	-0.501219	12.33	0.000445728	0.00477144	-1.31325	-1.20629	-0.355881	-1.57869	-0.129682	-0.0924281
Solyc09g057680.3.1	IPR017441	101264970	Leucine-rich repeat protein kinase family protein	-1.52048	-1.18263	12.3194	0.000448286	0.00479476	-0.73977	-1.07168	-2.15867	-0.766764	-2.74938	-2.15967
Solyc12g011010.2.1		101261198	protodermal factor 1	-4.67291	-2.89995	12.2909	0.00045518	0.00486438	-3.50413	-2.8708	-6.7078	-2.69798	-6.7078	-6.7078
Solyc01g097530.2.1	IPR000484		photosystem II reaction center protein A	1.85113	-1.48684	12.2546	0.000464121	0.00495573	-2.97233	-2.48122	-1.18982	-3.6111	-0.820715	-1.59541
Solyc02g076770.1.1	IPR019587		PYR1-like 6	4.75685	-2.83436	12.2037	0.00047696	0.00506923	-6.7078	-6.7078	-3.391	-6.7078	-3.65943	-2.15967
Solyc11g010570.2.1	IPR002100		K-box region and MADS-box transcription factor family protein	-2.57682	-2.20462	12.1962	0.000478863	0.00508517	-1.62663	-2.48122	-4.25303	-1.92953	-3.65943	-6.7078
Solyc04g014400.3.1	IPR017441		Rhamnogalacturonate lyase family protein	-2.18248	-1.9703	12.1954	0.000479086	0.00508541	-1.62663	-1.70728	-6.7078	-1.74347	-3.65943	-3.09929
Solyc09g014310.3.1		101252109		-1.43519	1.79574	12.1798	0.000483108	0.00512378	3.17084	1.51052	0.92315	1.64026	0.777483	0.95437
Solyc02g067100.3.1	IPR027329	101254663	TPX2 (targeting protein for Xklp2) protein family	2.29756	-2.0458	12.1418	0.000493054	0.0052205	-4.35547	-4.26679	-1.69096	-3.6111	-1.98235	-1.76013
Solyc04g074990.3.1	IPR009057		homeobox protein 22	-3.62036	-2.43305	12.1397	0.000493597	0.00522187	-1.31325	-2.8708	-4.25303	-3.08347	-6.7078	-6.7078
Solyc10g080550.2.1	IPR029989	101264473	Plant protein of unknown function (DUF828)	-1.12657	-0.129607	12.0878	0.000507537	0.0053447	0.385108	-0.0862622	-0.5236	0.308213	-1.35025	-0.875227
Solyc06g051795.1.1	IPR016164		FAD-linked oxidases family protein	-1.77555	-0.734159	12.0752	0.000510978	0.00537869	-0.131137	-0.152679	-2.15867	-0.522549	-4.4948	-1.07779
Solyc05g046110.3.1	IPR006740		Protein of unknown function (DUF604)	-5.88332	-2.24578	12.0445	0.000519464	0.00545437	-0.480582	-2.8708	-6.7078	-6.7078	-6.7078	-6.7078
Solyc06g059730.2.1	IPR014024	100527970	Auxin efflux carrier family protein	3.33082	-2.53928	12.0282	0.000524019	0.00549077	-4.35547	-6.7078	-2.85513	-6.7078	-2.44613	-2.15967
Solyc08g079140.1.1	IPR003676	104648957	SAUR-like auxin-responsive protein family	1.48177	-0.919741	12.0144	0.000527911	0.00552926	-2.27936	-2.17479	-0.437305	-1.74347	-0.304592	-1.07779
Solyc11g040340.2.1	IPR033126		cellulase 3	1.45306	-0.743784	11.9863	0.000535918	0.0056108	-2.27936	-1.92218	-0.818589	-1.43082	0.0262963	-0.539529
Solyc06g069710.3.1	IPR003441	101255705	NAC domain containing protein 100	-1.34183	0.553996	11.9366	0.000550427	0.0057389	1.69194	0.618522	-0.0695897	0.390055	-0.304592	-0.616418
Solyc11g005240.1.1	IPR012337		sensitivity to red light reduced protein (SRR1)	1.79648	-1.41149	11.9244	0.000554027	0.00576928	-4.35547	-2.8708	-0.932039	-2.14319	-1.48423	-0.875227
Solyc06g074680.3.1	IPR029058		Lecithin:cholesterol acyltransferase family protein	-1.24409	0.272583	11.8809	0.000567119	0.00589104	1.14372	0.308746	-0.713414	0.467504	-1.11466	-0.0385254
Solyc03g006173.1.1	IPR007493		Protein of unknown function, DUF538	-4.67038	-2.90012	11.8281	0.000583447	0.00603334	-2.27936	-4.26679	-6.7078	-3.08347	-6.7078	-6.7078
Solyc03g117790.2.1	IPR011009		Protein kinase superfamily protein	-4.9364	-2.76915	11.7847	0.000597182	0.00616274	-1.8132	-6.7078	-6.7078	-2.69798	-6.7078	-6.7078
Solyc02g089300.3.1		101249416		-5.48476	-2.48393	11.751	0.000608106	0.00625756	-0.83766	-4.26679	-6.7078	-4.4516	-6.7078	-6.7078
Solyc03g113680.3.1	IPR011989		ARM repeat superfamily protein	-1.37641	-0.705617	11.7377	0.000612481	0.00629489	-0.0703665	-0.372517	-1.90594	-0.599451	-1.11466	-2.41043
Solyc10g051030.2.1	IPR025757		Protein of unknown function, DUF547	-1.03844	0.837202	11.728	0.000615658	0.00632193	1.19413	1.57351	-0.355881	0.802458	0.167044	0.559291
Solyc12g049030.1.1	IPR005804	101255474	fatty acid desaturase 2	-1.75912	1.31144	11.7028	0.000624074	0.00639321	1.88843	2.69909	0.374002	0.308213	0.486512	-0.539529
Solyc04g051720.2.1		101257462		-3.61595	-2.43473	11.6907	0.000628135	0.00642959	-1.46145	-4.26679	-6.7078	-2.14319	-6.7078	-4.4652
Solyc09g097960.3.1	IPR023210		NAD(P)-linked oxidoreductase superfamily protein	-1.13837	1.32247	11.6352	0.000647146	0.00660544	1.63833	2.2239	1.16304	1.25973	0.0747541	0.450405
Solyc10g074920.2.1	IPR013781	101261972	Glycosyl hydrolase superfamily protein	-1.75742	0.184079	11.6208	0.000652174	0.00663797	1.31295	0.357284	-3.391	0.265482	-0.367947	-0.7837
Solyc10g049430.1.1	IPR012334		Plant invertase/pectin methylesterase inhibitor superfamily	-1.87266	-1.67659	11.6153	0.000654102	0.00665491	-1.8132	-1.07168	-3.391	-1.2967	-2.74938	-3.62629
Solyc05g006360.1.1	IPR021158	101252585	Matrixin family protein	4.61235	-2.90145	11.591	0.000662705	0.00673701	-6.7078	-6.7078	-3.391	-6.7078	-2.74938	-3.09929
Solyc07g008410.3.1	IPR002528		MATE efflux family protein	-1.57902	-0.562208	11.577	0.000667717	0.00677977	0.469392	-0.835146	-1.5039	-0.313751	-2.44613	-1.31351
Solyc06g053610.3.1	IPR017930	544113	myb domain protein 15	-1.52926	-0.0768519	11.5739	0.000668824	0.00678829	1.11784	0.096403	-0.932039	-0.44954	-1.11466	-1.31351
Solyc02g082770.3.1			Phosphoinositide phosphatase family protein	1.11409	-0.0985482	11.5342	0.000683281	0.0069211	-0.73977	-0.729991	-0.205646	-1.174	0.486512	0.291129
Solyc09g091890.3.1	IPR000626		small ubiquitin-like modifier 2	-1.57716	-1.31484	11.5205	0.000688329	0.00696664	-1.17887	-1.20629	-2.46527	-0.680684	-2.44613	-2.71413
Solyc03g007030.3.1	IPR018967	101244055	2 iron, 2 sulfur cluster binding	1.9962	-1.53875	11.5194	0.000688751	0.00696811	-6.7078	-3.40615	-0.818589	-2.14319	-1.22765	-1.59541
Solyc02g065250.2.1	IPR029058		methyl esterase 1	-1.2322	-0.688966	11.5119	0.000691522	0.00699335	-0.260943	-0.222301	-1.33833	-0.599451	-1.79654	-1.59541
Solyc12g096880.2.1	IPR000157		Disease resistance protein (TIR-NBS-LRR class) family	1.16483	-0.00642008	11.5058	0.000693776	0.00700522	-0.73977	-1.07168	-0.278809	-0.680684	0.450238	0.660532
Solyc04g057830.1.1	IPR025322	104646915		1.13387	-0.262095	11.491	0.000699322	0.00705246	-1.8132	-0.729991	-0.00608918	-0.858309	-0.0238458	0.204371
Solyc01g097290.3.1	IPR033389		indole-3-acetic acid inducible 14	-1.19575	-0.480942	11.3663	0.000747905	0.00747372	-0.0703665	-0.222301	-0.713414	-0.131387	-1.63195	-1.76013
Solyc06g061230.3.1	IPR009632			1.61756	-1.31519	11.325	0.000764697	0.0076204	-2.97233	-2.48122	-0.615387	-2.39408	-1.35025	-1.07779
Solyc10g083675.1.1	IPR029044		Nucleotide-diphospho-sugar transferases superfamily protein	-2.1264	-0.845175	11.3004	0.000774902	0.00770784	0.549024	-1.20629	-1.69096	-0.956059	-3.65943	-2.41043
Solyc03g115850.3.1	IPR003441		NAC domain containing protein 100	-1.02091	0.201231	11.2673	0.000788839	0.00783315	0.92237	0.258518	-0.615387	0.349714	-0.367947	-0.466532
Solyc12g006470.2.1	IPR015424	543874	Pyridoxal phosphate (PLP)-dependent transferases superfamily protein	-1.08673	-0.291417	11.2304	0.000804688	0.00796917	-0.131137	-0.0862622	-0.932039	0.265482	-0.9122	-1.31351
Solyc09g075400.3.1				-4.67255	-2.89987	11.2179	0.000810135	0.00800683	-2.02753	-4.26679	-6.7078	-3.6111	-6.7078	-6.7078
Solyc01g079980.3.1	IPR001461		Eukaryotic aspartyl protease family protein	-4.91193	-2.77015	11.2134	0.000812084	0.00802099	-2.97233	-6.7078	-6.7078	-1.74347	-6.7078	-6.7078
Solyc09g005260.3.1	IPR004837		cation exchanger 3	-2.08983	-1.67655	11.2097	0.000813713	0.00802961	-0.73977	-2.17479	-2.85513	-1.43082	-4.4948	-3.09929
Solyc01g080000.1.1	IPR021109	101246563	Eukaryotic aspartyl protease family protein	-3.88852	-2.29112	11.2089	0.000814044	0.00802974	-0.83766	-2.8708	-6.7078	-3.6111	-4.4948	-6.7078
Solyc05g018850.1.1				1.3013	1.73215	11.2014	0.000817359	0.00805929	0.660791	0.308746	1.16304	1.44346	2.45184	2.56971
Solyc07g063400.3.1	IPR003439	101248317	ABC-2 type transporter family protein	-4.68031	-2.8994	11.1583	0.000836584	0.00821832	-2.02753	-3.40615	-6.7078	-4.4516	-6.7078	-6.7078
Solyc01g079200.3.1	IPR027443	100134888	gibberellin 2-oxidase 6	1.27683	-0.356006	11.109	0.000859111	0.00841508	-1.8132	-0.835146	-0.5236	-1.2967	0.374835	-0.0385254
Solyc06g066410.3.1	IPR027310	101254907	profilin 5	1.47797	-0.851803	11.0994	0.000863554	0.00845085	-1.46145	-2.17479	-0.437305	-2.39408	-0.129682	-1.07779
Solyc03g097580.3.1	IPR004316		Nodulin MtN3 family protein	-1.26845	-0.442594	11.0504	0.000886698	0.00863171	0.295591	-0.0862622	-1.05518	-0.522549	-1.11466	-1.94612
Solyc12g043030.2.1	IPR001902		sulfate transporter 3;4	-2.74966	-2.4337	11.0411	0.000891119	0.00866473	-2.02753	-2.48122	-4.25303	-2.39408	-4.4948	-6.7078
Solyc10g076790.2.1	IPR013057	100736479	Transmembrane amino acid transporter family protein	-1.40498	-1.04417	11.0342	0.000894461	0.00869053	-0.648101	-0.631982	-3.391	-0.858309	-1.79654	-1.76013
Solyc12g006860.2.1	IPR001128	100736487	Cytochrome P450 superfamily protein	-2.40203	-1.64533	10.9614	0.000930314	0.00900422	-0.403593	-1.52028	-2.85513	-2.39408	-3.65943	-4.4652
Solyc03g082800.2.1				1.05882	1.30713	10.9006	0.000961337	0.00926539	0.427865	0.308746	0.92315	1.02372	1.92652	1.96407
Solyc03g097650.3.1	IPR003441	101262704	NAC domain containing protein 83	1.35718	-1.06459	10.8855	0.000969225	0.00931298	-2.27936	-1.92218	-0.615387	-2.14319	-0.9122	-0.7837
Solyc07g005540.1.1	IPR032675	101266531	Leucine-rich repeat protein kinase family protein	-4.51184	-2.97014	10.8865	0.000968674	0.00931298	-2.58463	-3.40615	-6.7078	-3.6111	-6.7078	-6.7078
Solyc10g052650.2.1			F-box family protein	-1.05302	-0.38353	10.8468	0.000989655	0.00948761	-0.194581	-0.0227691	-1.05518	-0.0214757	-1.11466	-1.19084
Solyc11g005350.2.1	IPR030184	101261286	nodulin MtN21 /EamA-like transporter family protein	1.91649	-1.45784	10.8414	0.000992568	0.00950831	-3.50413	-2.48122	-0.437305	-3.08347	-1.35025	-1.76013
Solyc01g104433.1.1				1.58097	-0.936572	10.8353	0.000995846	0.0095361	-2.58463	-2.8708	-0.205646	-1.43082	-0.434214	-1.19084
Solyc05g050870.3.1	IPR019793		Peroxidase superfamily protein	1.36579	-0.479319	10.8109	0.00100902	0.00965496	-2.02753	-1.35476	-0.818589	-1.174	-0.129682	0.332626
Solyc01g108700.3.1				-3.7388	-2.38366	10.7939	0.00101834	0.00972933	-1.17887	-2.17479	-6.7078	-4.4516	-6.7078	-4.4652
Solyc12g089020.2.1	IPR000719		Protein kinase superfamily protein	1.28389	-0.594173	10.7902	0.00102041	0.00974473	-1.31325	-2.48122	-0.0695897	-1.174	-0.653501	-0.0924281
Solyc06g071560.3.1	IPR001680	101256096	Protein phosphatase 2A, regulatory subunit PR55	-1.27008	-0.768888	10.7896	0.00102072	0.00974473	-0.330506	-0.729991	-1.90594	-0.313751	-1.22765	-2.15967
Solyc06g066630.1.1	IPR032805	101248686	acyl-CoA sterol acyl transferase 1	1.14605	0.338225	10.7603	0.00103703	0.00988543	-0.942679	-1.07168	0.821803	0.265482	0.777483	0.523901
Solyc03g111510.3.1	IPR001841		RING/U-box superfamily protein	-1.76488	-1.61905	10.6579	0.00109602	0.0103733	-1.05595	-1.20629	-4.25303	-1.74347	-2.44613	-3.09929
Solyc08g061060.2.1	IPR009009		plant natriuretic peptide A	-1.05997	0.090356	10.6477	0.00110205	0.0104265	0.469392	0.44972	-1.69096	0.390055	-0.243902	-0.397051
Solyc03g044180.1.1				-3.22321	-2.64712	10.6306	0.00111233	0.0104962	-2.58463	-2.17479	-4.25303	-3.08347	-6.7078	-6.7078
Solyc03g005570.3.1	IPR009057	101262488	myb domain protein 15	-1.397	-1.18348	10.5032	0.00119167	0.0111697	-1.05595	-0.948573	-2.46527	-0.680684	-2.44613	-1.94612
Solyc03g114705.1.1				-2.3612	-2.08098	10.4835	0.00120447	0.0112688	-2.02753	-1.20629	-4.25303	-2.39408	-3.13381	-6.7078
Solyc10g085050.2.1	IPR019378		O-fucosyltransferase family protein	1.09062	0.547514	10.4787	0.00120761	0.0112866	0.24866	-1.20629	0.92315	0.0304913	0.590161	1.17574
Solyc02g077610.3.1	IPR003441	101264084	NAC domain containing protein 73	-1.22515	0.558231	10.4577	0.00122142	0.0113978	1.42273	0.906393	0.466445	0.504722	-0.734687	-0.697636
Solyc02g032940.3.1	IPR021109		aspartic proteinase A1	-1.56568	-1.16298	10.4554	0.00122293	0.0113993	-0.330506	-1.20629	-3.391	-1.06092	-1.98235	-2.15967
Solyc07g056310.3.1	IPR012946	101248119	Carbohydrate-binding X8 domain superfamily protein	-1.18554	-0.719304	10.3958	0.00126305	0.0117084	-0.403593	-0.152679	-1.5039	-0.680684	-1.63195	-1.59541
Solyc02g094190.3.1	IPR010658	101267176	Major facilitator superfamily protein	-2.16244	-1.97006	10.3828	0.00127196	0.0117824	-2.02753	-2.17479	-2.85513	-1.174	-4.4948	-4.4652
Solyc11g005390.2.1				-1.097	-0.226762	10.3779	0.00127531	0.0117996	-0.0120526	0.096403	-1.5039	0.221446	-0.434214	-1.31351
Solyc01g099650.3.1	IPR015425	101244133	Actin-binding FH2 (formin homology 2) family protein	-2.35085	-2.08076	10.3774	0.0012757	0.0117996	-1.31325	-1.70728	-3.391	-2.69798	-3.65943	-6.7078
Solyc10g086490.2.1	IPR001932	101263176	pol-like 5	1.18438	-0.343416	10.3756	0.00127692	0.0118066	-2.27936	-0.948573	-0.278809	-0.766764	0.0747541	0.112059
Solyc02g086408.1.1				4.45097	-2.97156	10.3665	0.00128325	0.0118564	-6.7078	-6.7078	-3.391	-6.7078	-3.13381	-3.09929
Solyc05g014173.1.1				-2.42057	-2.29168	10.36	0.00128778	0.0118896	-2.58463	-1.92218	-4.25303	-1.92953	-6.7078	-3.62629
Solyc04g050010.2.1	IPR004883	101248668	LOB domain-containing protein 1	4.4547	-2.97094	10.3399	0.00130188	0.0120022	-6.7078	-6.7078	-2.85513	-6.7078	-3.65943	-3.09929
Solyc10g080730.2.1	IPR012336		atypical CYS HIS rich thioredoxin 4	-1.00437	0.162773	10.293	0.00133537	0.0122661	0.730764	0.657807	-0.713414	0.0304913	-0.243902	-0.616418
Solyc08g007840.2.1	IPR016177		Integrase-type DNA-binding superfamily protein	4.45018	-2.97165	10.2743	0.00134898	0.0123821	-6.7078	-6.7078	-3.391	-6.7078	-2.74938	-3.62629
Solyc06g053930.3.1	IPR002048	101257476	calmodulin 8	1.53693	-1.36483	10.2553	0.00136291	0.0124873	-2.27936	-4.26679	-1.18982	-2.14319	-1.11466	-0.972955
Solyc08g083500.2.1	IPR001128	101245978	cytochrome P450, family 706, subfamily A, polypeptide 4	-4.69421	-2.89894	10.2043	0.00140115	0.012782	-2.02753	-2.8708	-6.7078	-6.7078	-6.7078	-6.7078
Solyc08g078840.3.1		101252313		4.44573	-2.97218	10.1778	0.00142143	0.0129222	-6.7078	-6.7078	-4.25303	-6.7078	-2.74938	-3.09929
Solyc09g066360.1.1	IPR001471	101247461	ethylene response factor 1	1.04132	-0.0579819	10.156	0.00143833	0.0130598	-0.480582	-1.07168	0.223182	-0.858309	0.556432	-0.0924281
Solyc09g082360.3.1	IPR006045		cupin family protein	-4.67762	-2.89962	10.135	0.00145477	0.0131902	-1.8132	-4.26679	-6.7078	-4.4516	-6.7078	-6.7078
Solyc11g069070.2.1	IPR006121		Heavy metal transport/detoxification superfamily protein	-1.19791	-0.0193053	10.1102	0.00147448	0.0133449	0.730764	0.258518	-0.278809	0.0304913	-0.734687	-1.76013
Solyc05g051970.3.1	IPR025131	101246430		-2.5637	-1.35534	10.0461	0.00152668	0.0137462	-0.0703665	-0.729991	-2.15867	-2.69798	-4.4948	-4.4652
Solyc11g066270.2.1	IPR000757		xyloglucan endotransglucosylase/hydrolase 32	-1.31489	-0.31815	10.04	0.00153179	0.0137746	-0.131137	0.493808	-0.437305	-0.189651	-1.79654	-1.76013
Solyc03g059190.3.1	IPR002347	101263291	NAD(P)-binding Rossmann-fold superfamily protein	-2.83179	-2.38503	10.0106	0.00155643	0.0139664	-1.46145	-3.40615	-4.25303	-2.39408	-6.7078	-4.4652
Solyc08g016415.1.1				-3.9226	-2.24624	10.0063	0.00156008	0.0139792	-0.648101	-3.40615	-4.25303	-3.6111	-6.7078	-6.7078
Solyc03g112620.4.1	IPR025521		Protein of Unknown Function (DUF239)	1.05296	0.0795405	9.98651	0.00157691	0.01411	-0.942679	-1.20629	0.63526	-0.0753848	0.253784	0.332626
Solyc08g076170.1.1				-1.47254	-1.2898	9.97059	0.00159061	0.0142169	-1.17887	-0.835146	-1.90594	-0.956059	-3.65943	-2.15967
Solyc06g059990.3.1	IPR001441		Undecaprenyl pyrophosphate synthetase family protein	-6.71463	-1.64548	9.96333	0.00159689	0.0142635	0.58725	-6.7078	-6.7078	-6.7078	-6.7078	-6.7078
Solyc07g065540.1.1	IPR000782	101255812	FASCICLIN-like arabinogalactan 1	-1.04726	-0.314822	9.95001	0.00160848	0.014362	-0.0703665	-0.295455	-0.932039	0.265482	-0.9122	-1.31351
Solyc06g050900.3.1	IPR020846	101268872	Major facilitator superfamily protein	2.17215	-1.90369	9.93902	0.00161812	0.0144391	-4.35547	-4.26679	-2.15867	-3.08347	-1.00988	-2.15967
Solyc03g026080.3.1	IPR022764	101268356	RHOMBOID-like 2	-2.49185	-1.61791	9.9024	0.00165063	0.0146709	-0.330506	-1.35476	-6.7078	-2.69798	-2.74938	-3.62629
Solyc08g014430.3.1	IPR015425	101249109	formin homology 1	2.15677	-2.12474	9.82208	0.00172429	0.0152397	-3.50413	-4.26679	-2.46527	-4.4516	-1.98235	-1.59541
Solyc06g073080.3.1	IPR026992		2-oxoglutarate (2OG) and Fe(II)-dependent oxygenase superfamily protein	-1.61421	-1.38279	9.81824	0.0017279	0.0152555	-0.561911	-1.20629	-2.15867	-1.57869	-2.74938	-3.09929
Solyc03g033270.3.1			root cap 1 (RCP1)	-1.15331	-0.73509	9.81201	0.00173375	0.0152919	-0.260943	-0.54021	-1.18982	-0.522549	-1.63195	-1.94612
Solyc05g055845.1.1	IPR002213		UDP-Glycosyltransferase superfamily protein	1.13277	-0.539201	9.77725	0.00176685	0.0155344	-2.02753	-0.835146	-0.278809	-1.43082	-0.367947	-0.0924281
Solyc05g052880.3.1				-4.83836	-2.83194	9.77723	0.00176687	0.0155344	-1.62663	-3.40615	-6.7078	-6.7078	-6.7078	-6.7078
Solyc06g073165.1.1	IPR004873		polygalacturonase 2	1.99972	-2.00706	9.76451	0.00177913	0.0156259	-4.35547	-2.8708	-1.5039	-4.4516	-1.98235	-1.94612
Solyc02g085440.3.1	IPR001810		F-box family protein	2.00216	-2.00839	9.75081	0.00179244	0.0157263	-4.35547	-4.26679	-1.69096	-3.08347	-2.19569	-1.59541
Solyc10g011960.2.1	IPR006121		Heavy metal transport/detoxification superfamily protein	-1.82558	-0.843245	9.72042	0.00182232	0.0159497	0.295591	-0.222301	-1.90594	-1.92953	-2.19569	-2.41043
Solyc07g053450.3.1	IPR004827		Basic-leucine zipper (bZIP) transcription factor family protein	-1.26192	-0.769499	9.69806	0.00184462	0.0161114	-0.330506	-1.07168	-1.69096	-0.131387	-1.48423	-1.94612
Solyc10g079980.1.1	IPR002213	101252238	UDP-Glycosyltransferase superfamily protein	-4.5288	-2.96942	9.69826	0.00184443	0.0161114	-2.27936	-2.8708	-6.7078	-6.7078	-6.7078	-6.7078
Solyc01g009920.2.1	IPR003594		Histidine kinase-, DNA gyrase B-, and HSP90-like ATPase family protein	1.03732	-0.476071	9.69527	0.00184743	0.0161303	-1.31325	-1.35476	-0.355881	-1.06092	-0.129682	-0.148423
Solyc02g078450.3.1	IPR000301	101244923	Tetraspanin family protein	-1.66036	-1.67557	9.69196	0.00185076	0.0161538	-1.46145	-1.07168	-2.85513	-1.74347	-3.13381	-3.09929
Solyc12g088700.1.1	IPR002213		UDP-glucosyl transferase 73B5	1.2928	-0.292363	9.65198	0.00189148	0.016441	-0.73977	-2.48122	0.553321	-0.956059	-0.129682	-0.267388
Solyc02g071540.1.1	IPR007608		Protein of unknown function, DUF584	-2.6604	-2.48436	9.64791	0.00189567	0.0164661	-2.58463	-1.92218	-6.7078	-2.69798	-3.65943	-6.7078
Solyc02g085025.1.1				-3.10082	-2.7073	9.64615	0.00189749	0.0164714	-2.58463	-2.8708	-6.7078	-2.69798	-6.7078	-4.4652
Solyc01g056875.1.1				-4.32792	-3.04423	9.64468	0.00189901	0.0164781	-2.97233	-3.40615	-6.7078	-3.6111	-6.7078	-6.7078
Solyc06g084380.3.1	IPR005123		oxidoreductase, 2OG-Fe(II) oxygenase family protein	-4.66534	-2.90008	9.58635	0.00196029	0.0169052	-1.8132	-6.7078	-6.7078	-3.6111	-6.7078	-6.7078
Solyc10g083250.2.1	IPR006702	101255546	Uncharacterised protein family (UPF0497)	-1.07825	-0.198655	9.57811	0.00196911	0.0169639	0.0979475	0.536588	-0.713414	-0.313751	-1.22765	-0.875227
Solyc12g006520.2.1	IPR032696		Terpenoid cyclases family protein	-1.07549	-0.523749	9.57424	0.00197326	0.0169921	-0.561911	-0.152679	-1.5039	-0.0214757	-1.22765	-1.19084
Solyc08g077870.3.1				1.14097	-0.72593	9.56837	0.00197958	0.0170309	-1.46145	-1.92218	-0.5236	-1.43082	-0.243902	-0.616418
Solyc05g052300.3.1	IPR013057		Transmembrane amino acid transporter family protein	-2.62883	-1.93139	9.5642	0.00198408	0.017058	-2.97233	-0.54021	-4.25303	-2.14319	-4.4948	-3.62629
Solyc01g067940.2.1				-4.3244	-3.0447	9.55925	0.00198944	0.0170924	-2.97233	-4.26679	-6.7078	-3.08347	-6.7078	-6.7078
Solyc11g007420.1.1	IPR011009		suppressor of npr1-1 constitutive 4	1.87738	-1.90203	9.55133	0.00199804	0.0171496	-6.7078	-3.40615	-1.69096	-2.69798	-1.63195	-1.76013
Solyc05g007170.3.1	IPR021929		Disease resistance protein (CC-NBS-LRR class) family	-4.32779	-3.04427	9.54202	0.0020082	0.0172243	-4.35547	-2.8708	-6.7078	-3.08347	-6.7078	-6.7078
Solyc02g088750.2.1	IPR002213	101264288	UDP-Glycosyltransferase superfamily protein	-3.09634	-2.70702	9.53532	0.00201555	0.0172697	-2.97233	-2.8708	-4.25303	-2.39408	-6.7078	-6.7078
Solyc05g055200.3.1	IPR027417		Double Clp-N motif-containing P-loop nucleoside triphosphate hydrolases superfamily protein	2.31045	-2.29354	9.50229	0.00205215	0.0175238	-4.35547	-6.7078	-1.90594	-3.6111	-2.19569	-2.41043
Solyc03g093460.3.1	IPR000719	101265519	Protein kinase superfamily protein	-1.57332	-1.50962	9.4897	0.00206629	0.0176164	-0.942679	-1.20629	-2.85513	-1.57869	-2.19569	-3.62629
Solyc02g077820.1.1	IPR001471			-4.69133	-2.89915	9.48868	0.00206743	0.0176176	-1.8132	-3.40615	-6.7078	-6.7078	-6.7078	-6.7078
Solyc02g082170.2.1	IPR030182		purine permease 4	-3.44125	-2.53561	9.48459	0.00207205	0.0176401	-1.46145	-2.48122	-4.25303	-4.4516	-6.7078	-6.7078
Solyc01g080970.3.1	IPR029063		S-adenosyl-L-methionine-dependent methyltransferases superfamily protein	-3.09887	-2.70652	9.47897	0.00207841	0.0176823	-2.27936	-2.8708	-4.25303	-3.08347	-6.7078	-6.7078
Solyc08g061180.1.1			Pentatricopeptide repeat (PPR) superfamily protein	-1.92184	-1.31015	9.4682	0.00209065	0.0177744	-1.46145	-0.0227691	-2.85513	-1.74347	-2.44613	-3.09929
Solyc01g091170.3.1	IPR006035		arginase	-1.42091	-0.733405	9.41722	0.00214958	0.0181957	-0.942679	0.258518	-1.69096	-0.599451	-1.35025	-2.41043
Solyc04g076527.1.1	IPR010399		ZIM-LIKE 2	1.12479	0.105756	9.4093	0.00215888	0.0182561	-1.31325	-0.54021	0.510537	-0.313751	-0.129682	0.843908
Solyc04g050440.3.1	IPR024041		ammonium transporter 1;2	-4.3361	-3.04355	9.40027	0.00216954	0.0183217	-3.50413	-2.48122	-6.7078	-4.4516	-6.7078	-6.7078
Solyc06g008420.2.1			L-aspartate oxidase	-4.3361	-3.04355	9.40027	0.00216954	0.0183217	-3.50413	-2.48122	-6.7078	-4.4516	-6.7078	-6.7078
Solyc03g005890.1.1	IPR007608		Protein of unknown function, DUF584	-1.52044	-1.53565	9.38894	0.00218298	0.0183983	-1.46145	-1.20629	-2.15867	-1.174	-3.13381	-3.09929
Solyc07g006870.3.1	IPR000757		xyloglucan endotransglucosylase/hydrolase 25	-3.52308	-2.48373	9.36664	0.0022097	0.0185739	-1.17887	-3.40615	-4.25303	-3.6111	-6.7078	-6.7078
Solyc01g099487.1.1				1.16545	-0.868897	9.35742	0.00222084	0.0186489	-2.02753	-1.70728	-0.713414	-1.57869	-0.653501	-0.466532
Solyc04g010250.3.1	IPR029058	101266812	alpha/beta-Hydrolases superfamily protein	-1.16794	-0.881875	9.34002	0.00224203	0.0187955	-0.480582	-0.729991	-1.69096	-0.599451	-1.48423	-2.15967
Solyc03g095660.2.1			Nucleic acid-binding, OB-fold-like protein	-3.10494	-2.70696	9.3383	0.00224414	0.0188013	-3.50413	-2.17479	-6.7078	-2.69798	-4.4948	-6.7078
Solyc06g054620.3.1	IPR000571		Zinc finger C-x8-C-x5-C-x3-H type family protein	-1.02919	0.626916	9.32558	0.00225977	0.0189047	0.892151	1.46695	0.420964	0.504722	-0.503671	-0.0924281
Solyc03g006980.3.1	IPR013781		alpha-L-fucosidase 1	2.0006	-2.00887	9.30864	0.00228076	0.0190443	-2.97233	-6.7078	-1.90594	-3.6111	-2.19569	-1.44759
Solyc05g013540.1.1	IPR001471	101246247	DORNROSCHEN-like	1.3287	-0.884108	9.27855	0.00231853	0.019327	-1.46145	-1.92218	-0.5236	-2.39408	-1.11466	-0.20668
Solyc04g014260.2.1	IPR006456	101246239	homeobox protein 22	-3.17136	-2.20453	9.27592	0.00232186	0.0193365	-0.83766	-3.40615	-6.7078	-2.69798	-3.65943	-6.7078
Solyc10g049270.2.1	IPR001563	101260582	serine carboxypeptidase-like 19	-1.18982	-0.676421	9.26093	0.00234095	0.0194568	-0.0120526	-0.372517	-2.15867	-0.766764	-1.22765	-1.44759
Solyc06g075720.2.1	IPR004910			1.09851	-0.652504	9.25996	0.00234218	0.0194606	-1.31325	-1.52028	-0.713414	-1.57869	-0.304592	-0.20668
Solyc06g083490.3.1	IPR002347		NAD(P)-binding Rossmann-fold superfamily protein	-1.40973	-0.843729	9.25634	0.00234682	0.0194863	-0.131137	-0.222301	-1.33833	-1.2967	-2.19569	-2.15967
Solyc09g009420.1.1				1.37092	-1.0647	9.19489	0.00242691	0.0200721	-1.8132	-3.40615	-0.437305	-1.74347	-1.11466	-0.7837
Solyc08g062220.3.1	IPR002213	101247047	UDP-glucosyltransferase 74F2	-1.58381	-1.40655	9.1733	0.00245572	0.0202812	-0.73977	-0.835146	-2.46527	-1.92953	-2.74938	-2.71413
Solyc01g091540.2.1	IPR014977		growth-regulating factor 9	-5.08747	-2.70644	9.17407	0.00245468	0.0202812	-1.17887	-4.26679	-6.7078	-6.7078	-6.7078	-6.7078
Solyc07g055720.3.1	IPR008978		alpha-crystallin domain 32.1	-2.13226	-2.20407	9.15728	0.00247731	0.0204354	-1.8132	-1.92218	-4.25303	-2.39408	-3.13381	-6.7078
Solyc01g108390.3.1	IPR000864		Serine protease inhibitor, potato inhibitor I-type family protein	1.34275	-1.14486	9.12192	0.00252564	0.0207527	-3.50413	-1.70728	-0.932039	-1.92953	-0.734687	-0.972955
Solyc01g099510.2.1				1.76949	-1.43445	9.11284	0.00253822	0.0208357	-2.02753	-4.26679	-0.713414	-3.08347	-1.98235	-0.875227
Solyc07g053880.2.1	IPR003245		early nodulin-like protein 3	-2.255	-1.93339	9.10913	0.00254337	0.0208644	-0.83766	-1.92218	-4.25303	-2.69798	-3.13381	-4.4652
Solyc05g012210.3.1	IPR012463		ABI five binding protein 2	-1.82874	-1.45735	9.08296	0.00258001	0.0211101	-0.561911	-1.35476	-2.46527	-1.57869	-2.19569	-6.7078
Solyc09g009160.2.1	IPR006904			-4.31846	-3.04491	9.07563	0.00259038	0.0211538	-2.58463	-6.7078	-6.7078	-3.08347	-6.7078	-6.7078
Solyc04g072280.3.1	IPR008972	101261512	laccase 14	-2.9588	-2.00281	9.04823	0.00262949	0.0214108	-2.97233	-0.453928	-4.25303	-2.69798	-3.65943	-6.7078
Solyc03g121600.3.1	IPR023753		Glucose-methanol-choline (GMC) oxidoreductase family protein	-1.83892	-1.83106	9.01235	0.00268161	0.0217721	-1.17887	-1.70728	-2.85513	-1.92953	-6.7078	-2.71413
Solyc12g094720.2.1	IPR002683	101247415	Photosystem II reaction center PsbP family protein	2.41097	-2.2474	8.9977	0.00270319	0.021912	-6.7078	-4.26679	-1.33833	-3.6111	-2.74938	-2.41043
Solyc09g091460.3.1	IPR017441		PB1 domain-containing protein tyrosine kinase	1.58877	-1.65107	8.95869	0.00276153	0.0223295	-3.50413	-3.40615	-1.5039	-2.39408	-1.22765	-1.59541
Solyc06g036100.3.1	IPR004680	101263323	Divalent ion symporter	-1.00316	-0.0577238	8.94774	0.00277813	0.0224402	-0.0703665	0.578137	-0.278809	0.221446	-0.820715	-1.19084
Solyc10g080030.2.1	IPR002487	101259101	AGAMOUS-like 18	-2.42907	-2.29107	8.94209	0.00278674	0.0224953	-1.46145	-2.17479	-4.25303	-3.08347	-3.65943	-6.7078
Solyc11g011340.2.1	IPR020843	543602	elicitor-activated gene 3-1	1.09562	-0.528767	8.90109	0.00285	0.02294	-1.46145	-2.17479	-0.278809	-0.766764	-0.185662	-0.267388
Solyc03g097960.1.1	IPR004146	101264193	Cysteine/Histidine-rich C1 domain family protein	-3.22233	-2.16124	8.88626	0.00287325	0.0231124	-0.648101	-2.8708	-4.25303	-3.6111	-6.7078	-4.4652
Solyc01g080750.3.1	IPR024395	101248135	ARM repeat superfamily protein	1.54321	-0.599569	8.87784	0.00288652	0.0231822	-1.8132	-1.20629	-1.18982	-2.39408	0.486512	-0.466532
Solyc05g014000.3.1	IPR002022	101252082	Pectate lyase family protein	-1.30857	-1.16216	8.85361	0.00292509	0.0234398	-1.05595	-0.948573	-1.90594	-0.680684	-1.79654	-3.09929
Solyc11g018777.1.1	IPR002016		Peroxidase superfamily protein	-1.71478	-1.40883	8.85144	0.00292858	0.0234602	-2.02753	-1.07168	-2.15867	-0.522549	-3.65943	-2.71413
Solyc04g050570.3.1	IPR001087	101245452	GDSL-like Lipase/Acylhydrolase superfamily protein	-3.89382	-0.983303	8.84338	0.00294154	0.0235417	1.24284	-3.40615	-3.391	-4.4516	-4.4948	-4.4652
Solyc10g007640.3.1	IPR010987	101255036	glutathione S-transferase TAU 25	2.54067	-2.48627	8.83644	0.00295275	0.0236238	-3.50413	-6.7078	-2.46527	-6.7078	-2.19569	-2.71413
Solyc05g021390.3.1	IPR017972	101251676	cytochrome P450, family 716, subfamily A, polypeptide 1	1.94226	-1.86641	8.81954	0.00298021	0.0237983	-3.50413	-3.40615	-1.18982	-3.6111	-1.35025	-2.71413
Solyc01g099450.3.1				1.34185	-1.06777	8.81244	0.00299184	0.023861	-2.02753	-1.92218	-1.33833	-2.39408	-0.367947	-0.875227
Solyc12g017460.1.1	IPR001087	101257443	GDSL-like Lipase/Acylhydrolase superfamily protein	1.29364	0.0447847	8.8077	0.00299962	0.0239079	-0.561911	-0.372517	1.04807	-1.92953	0.167044	-0.0385254
Solyc06g050270.1.1	IPR000719		SOS3-interacting protein 1	-1.26438	-0.661817	8.79431	0.00302172	0.0240461	-0.648101	-0.453928	-1.33833	0.0304913	-2.74938	-1.07779
Solyc04g064600.1.1				-4.81804	-2.83262	8.77287	0.00305744	0.0242844	-1.46145	-6.7078	-6.7078	-4.4516	-6.7078	-6.7078
Solyc02g092550.3.1	IPR004883	101258116	LOB domain-containing protein 37	-1.08787	-0.443953	8.76729	0.00306681	0.0243512	-0.403593	0.308746	-1.5039	-0.380049	-0.9122	-1.31351
Solyc05g005380.2.1	IPR003958		nuclear factor Y, subunit B6	-4.83316	-2.83216	8.7543	0.00308873	0.0244867	-1.46145	-4.26679	-6.7078	-6.7078	-6.7078	-6.7078
Solyc01g107280.3.1	IPR004926	104645409		-3.2012	-2.64974	8.72085	0.00314591	0.0248697	-2.97233	-4.26679	-6.7078	-1.74347	-6.7078	-4.4652
Solyc10g080560.2.1	IPR011034	101264772	DNA-3-methyladenine glycosylase (MAG)	-1.25691	-0.783363	8.70925	0.00316599	0.0249971	-0.0703665	-0.54021	-2.15867	-0.858309	-1.11466	-2.15967
Solyc12g013640.2.1	IPR003439		ABC-2 type transporter family protein	-4.31422	-3.04499	8.69883	0.00318414	0.0251169	-6.7078	-3.40615	-6.7078	-2.39408	-6.7078	-6.7078
Solyc12g057050.2.1	IPR000425	101253463	NOD26-like intrinsic protein 3;1	-4.32016	-3.04466	8.6698	0.00323527	0.0254486	-2.27936	-6.7078	-6.7078	-3.6111	-6.7078	-6.7078
Solyc01g111820.2.1				4.25349	-3.04644	8.59724	0.00336673	0.026335	-6.7078	-6.7078	-6.7078	-6.7078	-3.13381	-2.71413
Solyc04g082540.2.1	IPR008551	101261618	Protein of unknown function (DUF833)	-4.34095	-3.04373	8.5817	0.00339558	0.0265277	-2.27936	-3.40615	-6.7078	-6.7078	-6.7078	-6.7078
Solyc03g019860.3.1				-2.3488	-2.33727	8.57937	0.00339993	0.0265536	-2.97233	-1.52028	-6.7078	-2.39408	-4.4948	-3.62629
Solyc11g065255.1.1				-1.03085	-0.191354	8.55389	0.00344784	0.026853	-0.480582	0.357284	-0.615387	0.349714	-0.9122	-1.19084
Solyc08g080770.3.1	IPR007612	101262643	Protein of unknown function (DUF567)	1.59277	-1.64869	8.53563	0.00348261	0.0271154	-2.27936	-3.40615	-1.05518	-3.6111	-1.48423	-1.76013
Solyc09g091810.1.1				-3.3326	-2.59036	8.5277	0.00349782	0.0272086	-1.46145	-2.8708	-4.25303	-4.4516	-6.7078	-6.7078
Solyc06g060190.3.1	IPR001128	101263421	cytochrome P450, family 71, subfamily B, polypeptide 36	-3.30605	0.0406219	8.52559	0.00350188	0.0272318	2.00597	-3.40615	-2.85513	0.176024	-1.35025	-6.7078
Solyc06g060620.3.1	IPR000109		nitrate transporter 1.1	1.08165	-0.327269	8.50489	0.00354194	0.0274925	-1.05595	-0.729991	-0.00608918	-1.57869	-0.503671	0.332626
Solyc01g108060.2.1	IPR029045		3-methylcrotonyl-CoA carboxylase	4.2619	-3.04574	8.49319	0.00356479	0.0276444	-6.7078	-6.7078	-4.25303	-6.7078	-4.4948	-2.41043
Solyc08g078170.1.1	IPR001471	104648964	ethylene responsive element binding factor 1	1.17088	-0.921445	8.48846	0.00357406	0.0276908	-2.27936	-1.70728	-1.05518	-1.57869	-0.503671	-0.539529
Solyc08g062970.1.1	IPR012336		Thioredoxin superfamily protein	-1.2015	-0.702899	8.45493	0.00364056	0.0281368	0.0439956	-0.453928	-1.05518	-0.858309	-1.98235	-1.76013
Solyc04g074790.2.1	IPR001841		RING/U-box superfamily protein	-1.40603	-1.51055	8.43327	0.00368417	0.0284304	-1.17887	-1.20629	-3.391	-1.43082	-2.44613	-2.41043
Solyc10g081520.1.1	IPR008972		plastocyanin-like domain-containing protein	4.29244	-3.04405	8.41846	0.00371431	0.0285843	-6.7078	-6.7078	-2.46527	-6.7078	-6.7078	-3.09929
Solyc04g058000.2.1	IPR011707	101244180	laccase 14	-1.38107	-1.26742	8.393	0.00376669	0.0288544	-0.83766	-0.835146	-2.15867	-1.2967	-3.65943	-1.76013
Solyc03g059155.1.1				-1.39717	-0.684722	8.39265	0.00376741	0.0288544	-0.561911	0.357284	-1.05518	-0.956059	-1.98235	-2.15967
Solyc08g079150.1.1	IPR003676	101246270	SAUR-like auxin-responsive protein family	-2.96661	-2.76901	8.38378	0.00378584	0.0289407	-2.58463	-3.40615	-6.7078	-2.69798	-6.7078	-4.4652
Solyc01g097280.2.1	IPR001002		pathogenesis-related 4	1.11767	-0.786801	8.31933	0.00392255	0.0298591	-1.62663	-1.35476	-0.713414	-1.92953	-0.734687	-0.20668
Solyc06g005130.3.1	IPR003851	101252493	Dof-type zinc finger DNA-binding family protein	-4.1173	-3.12233	8.31166	0.00393914	0.0299403	-3.50413	-3.40615	-6.7078	-3.6111	-6.7078	-6.7078
Solyc03g111110.1.1				2.00897	-2.20692	8.30439	0.00395493	0.0300513	-3.50413	-4.26679	-2.46527	-4.4516	-1.79654	-2.15967
Solyc03g013320.1.1				1.52527	-1.46131	8.30042	0.00396359	0.0300989	-3.50413	-1.92218	-1.5039	-3.08347	-1.48423	-0.7837
Solyc03g042560.2.1	IPR001106		phenylalanine ammonia-lyase 2	1.86744	-2.08397	8.29209	0.00398182	0.0301829	-4.35547	-4.26679	-1.69096	-3.08347	-2.19569	-1.94612
Solyc05g006645.1.1	IPR006539		aminophospholipid ATPase 3	1.02594	0.836825	8.26134	0.00404983	0.0306341	0.295591	-0.453928	0.374002	0.467504	1.26896	1.62309
Solyc01g097920.3.1	IPR005859		O-acetylserine (thiol) lyase isoform C	-1.18244	-0.495033	8.24488	0.00408672	0.0308484	0.24866	-0.372517	-1.05518	-0.44954	-0.9122	-2.41043
Solyc07g065160.3.1				-4.11368	-3.1228	8.24142	0.00409451	0.0308979	-3.50413	-4.26679	-6.7078	-3.08347	-6.7078	-6.7078
Solyc11g063530.1.1	IPR008686		Mitovirus RNA-dependent RNA polymerase	-1.38266	-1.26618	8.22807	0.00412473	0.0310981	-1.05595	-0.54021	-1.90594	-1.43082	-3.13381	-2.15967
Solyc04g009710.2.1	IPR001041		ferredoxin 3	-4.11968	-3.12208	8.22826	0.0041243	0.0310981	-2.97233	-3.40615	-6.7078	-4.4516	-6.7078	-6.7078
Solyc11g011870.2.1	IPR011009		Leucine-rich repeat transmembrane protein kinase	-4.12173	-3.12187	8.22469	0.00413242	0.0311282	-3.50413	-2.8708	-6.7078	-4.4516	-6.7078	-6.7078
Solyc05g009320.3.1	IPR004883		LOB domain-containing protein 41	-2.97368	-2.76813	8.18151	0.00423195	0.0317642	-3.50413	-2.17479	-6.7078	-3.08347	-6.7078	-4.4652
Solyc11g062400.2.1	IPR000719	101257732	protein kinase 2B	-1.63237	-1.5901	8.15896	0.00428489	0.0320947	-1.46145	-0.729991	-4.25303	-1.92953	-2.74938	-2.41043
Solyc09g010230.2.1	IPR003340	101257504	AP2/B3-like transcriptional factor family protein	-1.50014	-1.46125	8.15725	0.00428893	0.0321155	-1.17887	-1.52028	-6.7078	-0.956059	-2.19569	-2.15967
Solyc01g098790.2.1	IPR002068	101262870	HSP20-like chaperones superfamily protein	-1.43993	-1.48303	8.14849	0.00430971	0.0322519	-0.942679	-1.52028	-1.90594	-1.2967	-2.74938	-3.62629
Solyc01g068130.3.1		101260262		1.20652	-0.899197	8.12227	0.00437249	0.032625	-1.8132	-1.35476	-0.278809	-2.39408	-0.576642	-1.07779
Solyc02g080060.1.1	IPR002902		cysteine-rich RLK (RECEPTOR-like protein kinase) 25	1.16486	-0.609533	8.11679	0.00438572	0.0326934	-2.97233	-0.948573	-0.5236	-1.174	-0.129682	-0.330763
Solyc05g008235.1.1	IPR009057		MYB-like 2	-2.23806	-2.38466	8.11559	0.00438861	0.0326969	-2.97233	-2.17479	-3.391	-1.92953	-6.7078	-4.4652
Solyc03g025925.1.1				-1.01261	0.318059	8.08938	0.00445254	0.0330952	1.09149	0.696051	-0.932039	0.0304913	-0.304592	0.0134357
Solyc05g050510.3.1	IPR004910	101248780	Yippee family putative zinc-binding protein	-2.55668	-2.5373	8.05259	0.00454388	0.0336749	-1.8132	-2.8708	-6.7078	-3.08347	-3.65943	-6.7078
Solyc04g076630.3.1	IPR013784		Rhamnogalacturonate lyase family protein	-1.08605	-0.0792702	8.03999	0.00457558	0.03387	-0.0120526	0.096403	-0.136014	0.610942	-1.00988	-1.59541
Solyc01g097380.2.1	IPR023210		NAD(P)-linked oxidoreductase superfamily protein	-4.11824	-3.12229	8.02861	0.0046044	0.0340109	-2.58463	-4.26679	-6.7078	-4.4516	-6.7078	-6.7078
Solyc02g070060.1.1	IPR016169		FAD-binding Berberine family protein	-4.11824	-3.12229	8.02861	0.0046044	0.0340109	-2.58463	-4.26679	-6.7078	-4.4516	-6.7078	-6.7078
Solyc11g070010.2.1	IPR022812		Dynamin related protein 4C	-4.11824	-3.12229	8.02861	0.0046044	0.0340109	-2.58463	-4.26679	-6.7078	-4.4516	-6.7078	-6.7078
Solyc03g112460.3.1	IPR015422	101262607	tryptophan aminotransferase related 2	-1.20314	-0.560589	8.01479	0.00463969	0.0341942	0.341044	-0.631982	-0.932039	-0.599451	-1.79654	-1.59541
Solyc07g055460.3.1	IPR001128		cytochrome P450, family 72, subfamily A, polypeptide 15	2.44183	-2.53811	8.01133	0.00464856	0.0342495	-4.35547	-6.7078	-2.15867	-4.4516	-2.74938	-2.71413
Solyc10g078230.2.1	IPR002401		cytochrome P450, family 98, subfamily A, polypeptide 3	-4.10898	-3.12301	8.00457	0.00466594	0.0343375	-2.97233	-6.7078	-6.7078	-3.08347	-6.7078	-6.7078
Solyc07g008240.3.1	IPR009050	100736435	hemoglobin 1	-1.1688	0.448868	7.99597	0.00468815	0.0344808	0.58725	1.59391	-0.0695897	-0.0214757	-0.434214	-0.397051
Solyc06g036300.3.1				1.35501	-1.06232	7.98045	0.00472852	0.0346767	-2.97233	-1.20629	-0.437305	-2.69798	-1.00988	-0.875227
Solyc04g078140.3.1	IPR001199	101264620	cytochrome B5 isoform D	-1.24015	-0.845538	7.96665	0.0047647	0.034861	-0.330506	-0.152679	-1.90594	-1.2967	-1.98235	-1.44759
Solyc06g035440.3.1	IPR009675		Cell cycle regulated microtubule associated protein	-1.11781	-0.532621	7.9623	0.00477616	0.0349246	0.200151	-0.222301	-0.932039	-0.766764	-1.79654	-1.31351
Solyc11g042880.2.1	IPR004864			-4.12933	-3.12161	7.94596	0.00481949	0.0351499	-2.97233	-2.8708	-6.7078	-6.7078	-6.7078	-6.7078
Solyc09g015505.1.1			ankyrin repeat-containing protein 2	-1.22502	-1.14261	7.93187	0.00485715	0.0353938	-0.83766	-1.35476	-1.90594	-0.599451	-1.98235	-2.41043
Solyc00g026160.3.1	IPR013121		ferric reduction oxidase 4	-2.95756	-2.76869	7.92338	0.00487999	0.0355397	-2.27936	-4.26679	-4.25303	-2.69798	-6.7078	-6.7078
Solyc09g090530.3.1				-2.15833	-1.80147	7.90091	0.00494099	0.0359218	-0.942679	-2.8708	-4.25303	-1.2967	-2.44613	-6.7078
Solyc08g077360.3.1	IPR003130	101258089	DYNAMIN-like 1E	1.64322	-1.74021	7.8665	0.00503591	0.0364858	-6.7078	-2.48122	-1.90594	-2.69798	-1.63195	-1.19084
Solyc02g014560.3.1	IPR011992	101249219	calcium-binding EF hand family protein	-4.10992	-3.12284	7.85181	0.00507699	0.0367202	-6.7078	-3.40615	-6.7078	-2.69798	-6.7078	-6.7078
Solyc00g125275.1.1	IPR003653			-4.11094	-3.12276	7.84873	0.00508564	0.0367301	-2.58463	-6.7078	-6.7078	-3.6111	-6.7078	-6.7078
Solyc02g070820.1.1		104645888		-1.03131	-0.429381	7.83319	0.00512954	0.0369731	-0.194581	0.15249	-0.818589	-0.380049	-1.98235	-0.875227
Solyc05g021180.2.1				-4.32406	-3.04441	7.81921	0.00516939	0.0372284	-2.02753	-6.7078	-6.7078	-4.4516	-6.7078	-6.7078
Solyc07g054930.3.1	IPR027443		2-oxoglutarate (2OG) and Fe(II)-dependent oxygenase superfamily protein	-4.32406	-3.04441	7.81921	0.00516939	0.0372284	-2.02753	-6.7078	-6.7078	-4.4516	-6.7078	-6.7078
Solyc04g072940.3.1				1.04588	-0.253329	7.81345	0.00518589	0.037326	-2.02753	-1.07168	-0.0695897	-0.380049	0.211066	-0.0385254
Solyc08g076250.2.1	IPR001128		cytochrome P450, family 71, subfamily B, polypeptide 35	-4.12741	-3.12183	7.80534	0.00520921	0.0374725	-2.58463	-3.40615	-6.7078	-6.7078	-6.7078	-6.7078
Solyc01g066450.3.1	IPR029058	101259572	alpha/beta-Hydrolases superfamily protein	-4.33888	-3.04394	7.79202	0.00524776	0.0377068	-2.02753	-4.26679	-6.7078	-6.7078	-6.7078	-6.7078
Solyc12g008930.2.1	IPR011598		basic helix-loop-helix (bHLH) DNA-binding family protein	-4.13656	-3.1214	7.78518	0.00526765	0.0378371	-3.50413	-2.48122	-6.7078	-6.7078	-6.7078	-6.7078
Solyc03g031730.3.1	IPR001360		beta-glucosidase 47	4.0558	-3.12363	7.75692	0.00535072	0.0383483	-6.7078	-6.7078	-4.25303	-6.7078	-3.65943	-3.09929
Solyc06g008100.3.1				2.86486	-2.77001	7.75047	0.00536985	0.0384536	-6.7078	-6.7078	-2.85513	-4.4516	-2.74938	-3.09929
Solyc06g060480.1.1	IPR007087	101249183	C2H2-like zinc finger protein	4.05932	-3.12318	7.74992	0.0053715	0.0384536	-6.7078	-6.7078	-3.391	-6.7078	-3.13381	-4.4652
Solyc11g005230.1.1	IPR012942	104644443	sensitivity to red light reduced protein (SRR1)	4.05932	-3.12318	7.74992	0.0053715	0.0384536	-6.7078	-6.7078	-3.391	-6.7078	-3.13381	-4.4652
Solyc06g007610.2.1	IPR029068		Lactoylglutathione lyase / glyoxalase I family protein	-1.42539	-1.58996	7.75104	0.00536815	0.0384536	-1.05595	-1.52028	-2.15867	-1.57869	-3.13381	-3.09929
Solyc07g054840.3.1	IPR017930		MYB-like 102	1.29881	-1.25176	7.70452	0.00550826	0.0392989	-2.97233	-2.8708	-1.18982	-1.57869	-0.820715	-1.07779
Solyc04g007950.3.1	IPR002902	101266018	plasmodesmata-located protein 6	-1.03776	-0.428517	7.68041	0.00558236	0.0397601	-0.0703665	0.258518	-0.818589	-0.680684	-1.22765	-1.44759
Solyc11g020760.2.1	IPR014001		DEAD/DEAH box RNA helicase family protein	1.85622	-2.08596	7.6711	0.00561121	0.0399206	-3.50413	-4.26679	-2.85513	-3.6111	-1.79654	-1.59541
Solyc01g073720.2.1		104647874		-1.30169	-1.31594	7.66899	0.00561778	0.039956	-1.46145	-1.20629	-2.85513	-0.680684	-2.19569	-2.15967
Solyc01g057310.3.1			phragmoplast orienting kinesin 1	1.10047	-0.698121	7.62752	0.00574845	0.0407362	-1.31325	-1.92218	-1.05518	-1.43082	-0.367947	-0.0924281
Solyc12g044610.2.1	IPR001005	101248552	Homeodomain-like superfamily protein	-1.63792	-1.48262	7.61435	0.00579057	0.0409772	-0.648101	-0.948573	-3.391	-2.39408	-2.44613	-2.71413
Solyc10g084060.2.1	IPR028144			-1.50697	-1.35745	7.60546	0.00581917	0.0411565	-0.73977	-0.729991	-1.90594	-1.92953	-2.44613	-3.62629
Solyc02g063000.3.1	IPR002213	101261193	UDP-Glycosyltransferase superfamily protein	2.87034	-2.76932	7.6021	0.00583004	0.0412218	-6.7078	-6.7078	-2.46527	-4.4516	-3.65943	-2.71413
Solyc06g006090.1.1		104647802	josephin protein-related	-2.14994	-2.43361	7.58563	0.00588355	0.0415072	-2.27936	-2.17479	-4.25303	-2.69798	-3.65943	-6.7078
Solyc02g084310.2.1				1.80219	-1.93838	7.57841	0.00590715	0.0416504	-2.97233	-4.26679	-2.85513	-3.6111	-1.63195	-1.31351
Solyc09g065750.3.1	IPR025114			1.24923	-1.06398	7.57689	0.00591213	0.0416738	-3.50413	-1.52028	-0.5236	-1.74347	-0.820715	-1.07779
Solyc03g120030.1.1	IPR008395	101263599	Plant Tudor-like protein	4.0551	-3.12355	7.57395	0.00592177	0.0417185	-6.7078	-6.7078	-4.25303	-6.7078	-4.4948	-2.71413
Solyc03g044900.3.1	IPR002048	101253669	calmodulin-like 41	-1.49926	-1.05769	7.57108	0.00593123	0.0417386	-0.83766	0.0380471	-1.90594	-1.74347	-2.19569	-2.41043
Solyc01g108850.2.1	IPR003591		transmembrane kinase 1	4.07824	-3.12194	7.53499	0.0060512	0.0424172	-6.7078	-6.7078	-2.46527	-6.7078	-4.4948	-4.4652
Solyc09g059240.3.1	IPR002401	101246085	cytochrome P450, family 82, subfamily C, polypeptide 4	1.08974	-0.80375	7.53243	0.0060598	0.0424539	-1.05595	-1.92218	-0.818589	-2.14319	-0.367947	-0.539529
Solyc05g006220.3.1	IPR011650	101266415	IAA-leucine resistant (ILR)-like 2	1.17367	-1.10542	7.52088	0.0060988	0.0426797	-2.58463	-1.70728	-1.18982	-1.92953	-0.9122	-0.616418
Solyc03g063140.3.1	IPR004883		Lateral organ boundaries (LOB) domain family protein	1.37296	-1.27361	7.51543	0.00611728	0.0427617	-2.27936	-1.92218	-1.69096	-3.08347	-0.576642	-1.07779
Solyc07g062480.1.1	IPR001480		Curculin-like (mannose-binding) lectin family protein	-1.36042	1.14364	7.50422	0.00615545	0.042969	1.5636	2.34918	1.07769	0.504722	-0.503671	-0.148423
Solyc00g289230.2.1	IPR008271		S-locus lectin protein kinase family protein	-1.50172	-1.7684	7.49892	0.00617361	0.0430719	-1.62663	-1.35476	-4.25303	-1.74347	-3.13381	-2.41043
Solyc04g056570.3.1	IPR000157	101248007	disease resistance protein (TIR-NBS-LRR class), putative	4.07185	-3.12239	7.48868	0.0062088	0.0432458	-6.7078	-6.7078	-2.85513	-6.7078	-6.7078	-3.09929
Solyc10g044540.2.1	IPR027417		ATP synthase subunit alpha	4.07185	-3.12239	7.48868	0.0062088	0.0432458	-6.7078	-6.7078	-2.85513	-6.7078	-6.7078	-3.09929
Solyc08g079880.2.1	IPR000209		Subtilase family protein	-1.96619	-2.29143	7.46514	0.0062905	0.0435623	-2.58463	-1.70728	-4.25303	-2.39408	-3.65943	-4.4652
Solyc03g118220.2.1	IPR001680		transducin family protein / WD-40 repeat family protein	4.24432	-3.04616	7.44387	0.00636527	0.0439595	-6.7078	-6.7078	-4.25303	-6.7078	-2.19569	-6.7078
Solyc07g054720.2.1	IPR003465		serine-type endopeptidase inhibitors	4.24432	-3.04616	7.44387	0.00636527	0.0439595	-6.7078	-6.7078	-4.25303	-6.7078	-2.19569	-6.7078
Solyc04g014830.2.1	IPR030005		SCARECROW-like 13	-1.12528	-0.661544	7.44265	0.00636959	0.0439773	-0.131137	-0.54021	-1.33833	-0.44954	-0.9122	-2.71413
Solyc03g019890.3.1	IPR031330	543610	beta-galactosidase 10	1.05411	-0.500358	7.42887	0.00641856	0.0442187	-1.62663	-0.835146	-0.278809	-1.43082	0.167044	-0.697636
Solyc03g120060.2.1	IPR001128		Cytochrome P450 superfamily protein	-2.99076	-2.76741	7.42648	0.0064271	0.0442413	-2.97233	-1.92218	-6.7078	-4.4516	-6.7078	-4.4652
Solyc01g104340.2.1	IPR008496	778262	Protein of unknown function (DUF778)	-1.9951	-1.3813	7.37394	0.00661759	0.04533	-0.403593	-0.54021	-3.391	-3.08347	-2.19569	-3.62629
Solyc09g061700.3.1	IPR011990		Tetratricopeptide repeat (TPR)-like superfamily protein	-1.38424	-1.43573	7.35379	0.00669215	0.0457726	-0.942679	-1.70728	-4.25303	-1.06092	-2.44613	-1.94612
Solyc03g111300.1.1	IPR002403	101263302	cytochrome P450, family 94, subfamily B, polypeptide 3	1.53965	-1.67818	7.34323	0.00673159	0.0459986	-3.50413	-2.48122	-1.33833	-3.08347	-2.19569	-1.07779
Solyc04g014530.1.1	IPR001471	101267105	ethylene response factor 1	-1.12163	-0.491792	7.33404	0.00676607	0.0461967	-0.330506	0.308746	-0.818589	-0.599451	-1.11466	-2.15967
Solyc11g012660.2.1	IPR009768	101263482	microtubule-associated proteins 70-5	-2.17338	-1.9705	7.33219	0.00677304	0.0462318	-0.83766	-3.40615	-4.25303	-1.92953	-4.4948	-3.09929
Solyc10g006380.2.1	IPR027417		Ras-related small GTP-binding family protein	-4.95917	-2.76814	7.3205	0.00681724	0.0465083	-1.17887	-6.7078	-6.7078	-6.7078	-6.7078	-6.7078
Solyc11g006710.2.1	IPR002293	101245518	cationic amino acid transporter 7	-1.11862	-0.177466	7.31813	0.00682626	0.0465494	0.469392	0.44972	-0.713414	-0.599451	-0.576642	-1.76013
Solyc10g005470.3.1		104649495		1.66644	-1.7373	7.30965	0.00685853	0.0467269	-2.27936	-4.26679	-0.932039	-3.6111	-1.63195	-2.15967
Solyc02g092220.1.1				-2.04901	-2.24626	7.30731	0.00686745	0.046775	-1.46145	-2.17479	-3.391	-3.08347	-4.4948	-4.4652
Solyc12g005170.2.1	IPR001128	101253063	cytochrome p450 79a2	-3.43997	-2.53537	7.28797	0.00694177	0.0472048	-1.31325	-2.48122	-4.25303	-6.7078	-6.7078	-6.7078
Solyc03g044850.1.1				-1.46671	-1.67548	7.28493	0.00695355	0.0472467	-1.62663	-0.948573	-2.85513	-1.92953	-2.74938	-3.09929
Solyc05g053530.1.1	IPR004294		nine-cis-epoxycarotenoid dioxygenase 6	-4.11363	-3.12251	7.28281	0.00696176	0.047277	-2.27936	-6.7078	-6.7078	-4.4516	-6.7078	-6.7078
Solyc06g035530.3.1	IPR005123		2-oxoglutarate (2OG) and Fe(II)-dependent oxygenase superfamily protein	-4.11363	-3.12251	7.28281	0.00696176	0.047277	-2.27936	-6.7078	-6.7078	-4.4516	-6.7078	-6.7078
Solyc02g080580.1.1	IPR007608	101252739	Protein of unknown function, DUF584	-2.14292	-2.43465	7.27839	0.0069789	0.0473552	-2.02753	-3.40615	-4.25303	-2.14319	-4.4948	-4.4652
Solyc07g006020.3.1	IPR004254	101252897	heptahelical transmembrane protein2	-1.96381	-2.29213	7.2661	0.00702682	0.0476036	-1.8132	-2.48122	-4.25303	-2.39408	-3.13381	-6.7078
Solyc01g103360.3.1	IPR006514	101263550	Protein of unknown function (DUF579)	-2.23827	-2.3867	7.26332	0.00703772	0.0476391	-2.97233	-2.8708	-6.7078	-1.57869	-4.4948	-3.62629
Solyc03g080150.3.1	IPR000823	101252368	Peroxidase superfamily protein	-4.12668	-3.12204	7.25988	0.00705121	0.0476666	-2.27936	-4.26679	-6.7078	-6.7078	-6.7078	-6.7078
Solyc04g064763.1.1	IPR000571		Zinc finger C-x8-C-x5-C-x3-H type family protein	-4.12668	-3.12204	7.25988	0.00705121	0.0476666	-2.27936	-4.26679	-6.7078	-6.7078	-6.7078	-6.7078
Solyc12g042800.2.1				-4.12668	-3.12204	7.25988	0.00705121	0.0476666	-2.27936	-4.26679	-6.7078	-6.7078	-6.7078	-6.7078
Solyc01g104150.3.1				-1.02066	-0.765063	7.24044	0.00712794	0.048095	-0.330506	-0.453928	-1.05518	-0.766764	-1.98235	-1.59541
Solyc07g017370.2.1				-2.82545	-2.83261	7.22873	0.0071746	0.0483194	-2.58463	-2.8708	-6.7078	-3.6111	-4.4948	-6.7078
Solyc00g044750.2.1	IPR012677		RNA-binding (RRM/RBD/RNP motifs) family protein	-2.56199	-2.53577	7.18199	0.00736388	0.0493703	-1.8132	-2.17479	-4.25303	-4.4516	-4.4948	-6.7078
Solyc01g099483.1.1	IPR014001		RECQ helicase SIM	2.35618	-2.25201	7.18032	0.00737077	0.0494033	-3.50413	-6.7078	-4.25303	-4.4516	-1.48423	-1.94612
Solyc05g009610.1.1	IPR013094		alpha/beta-Hydrolases superfamily protein	-1.01533	-0.360001	7.1779	0.00738072	0.0494569	-0.260943	-0.295455	-0.713414	0.265482	-1.98235	-0.7837
